# Supplementary material for: Spatially Resolved Transcriptomics Deconvolutes Prognostic Histological Subgroups in Patients with Colorectal Cancer and Synchronous Liver Metastases
Source: PubMed Central journal article supplement (PMC10102851; doi:10.1158/0008-5472.can-22-2794), 2023-04-14
Supplement: can-22-2794_supplementary_data_suppst1-st2sf1-sf13.pdf [file can-22-2794_supplementary_data_suppst1-st2sf1-sf13.pdf]

|        |         |        |        |         |         |       |
|--------|---------|--------|--------|---------|---------|-------|
| ABCB1  | CSF1R   | FGFR4  | KMT2A  | PHF6    | SLC22A1 | ZMYM3 |
| ABCC2  | CTNNB1  | FLT1   | KRAS   | PIK3CA  | SLC22A2 |       |
| ABL1   | CYP19A1 | FLT3   | LAMA2  | PIK3R1  | SLC31A1 |       |
| ABL2   | CYP2A6  | FLT4   | LCK    | PSMB1   | SLC34A2 |       |
| AKT1   | CYP2B6  | FSTL5  | LTK    | PSMB2   | SLC45A3 |       |
| AKT2   | CYP2C19 | GNA11  | MAP2K1 | PSMB5   | SLCO1B1 |       |
| AKT3   | CYP2C9  | GNAQ   | MAP2K2 | PSMD1   | SMAD4   |       |
| ALK    | CYP2D6  | GNAS   | MAP2K4 | PSMD2   | SMARCA4 |       |
| APC    | DDR1    | GSTP1  | MAP3K1 | PTCH1   | SMARCB1 |       |
| ASXL1  | DDR2    | H3F3A  | MAPK1  | PTEN    | SMO     |       |
| ATM    | DDX3X   | HNF1A  | MED13  | PTPN11  | SNCAIP  |       |
| ATRX   | DNMT3A  | HRAS   | MET    | RAF1    | SOS1    |       |
| BRAF   | DPYD    | IDH1   | MLH1   | RARA    | SPRED1  |       |
| BRCA1  | EGFR    | IDH2   | MPL    | RARB    | SRC     |       |
| BRCA2  | ERBB2   | IKZF1  | MST1R  | RARG    | STK11   |       |
| CBL    | ERBB3   | IL2RA  | MTOR   | RB1     | SUFU    |       |
| CDA    | ERBB4   | IL2RB  | MYC    | RET     | TAS2R38 |       |
| CDH1   | ERG     | IL2RG  | MYD88  | ROS1    | TET2    |       |
| CDKN2A | ESR1    | INPP4B | NELL2  | RPS6KB1 | TP53    |       |
| CDKN2B | ESR2    | JAK1   | NF1    | RUNX1   | TRRAP   |       |
| CEBPA  | EZH2    | JAK2   | NOTCH1 | RXRA    | TYK2    |       |
| CHD7   | FBXW7   | JAK3   | NPM1   | RXRB    | UGT1A1  |       |
| CHIC2  | FGFR1   | KDM6A  | NRAS   | RXRG    | VHL     |       |
| CREBBP | FGFR2   | KDR    | PDGFRA | SHH     | WT1     |       |
| CRLF2  | FGFR3   | KIT    | PDGFRB | SHOC2   | YES1    |       |

**Supplemental Table 1:**  
GPOL 151 cancer-associated gene panel

| Step                 | Temp. | Time   | Cycles |
|----------------------|-------|--------|--------|
| UDG incubation       | 37°C  | 30 min | 1 X    |
| UDG deactivation     | 50°C  | 10 min | 1 X    |
| Initial denaturation | 95°C  | 3 min  | 1 X    |
| Denaturation         | 95°C  | 15 sec | 18 X   |
| Anneal               | 65°C  | 60 sec |        |
| Extend               | 68°C  | 30 sec |        |
| Final extension      | 68°C  | 5 min  | 1 X    |
| Hold                 | 4°C   | ∞      | 1 X    |

**Supplemental Table 2:**

The cycling conditions of the PCR plate during the library preparation. Protocol provided by Nanostring.

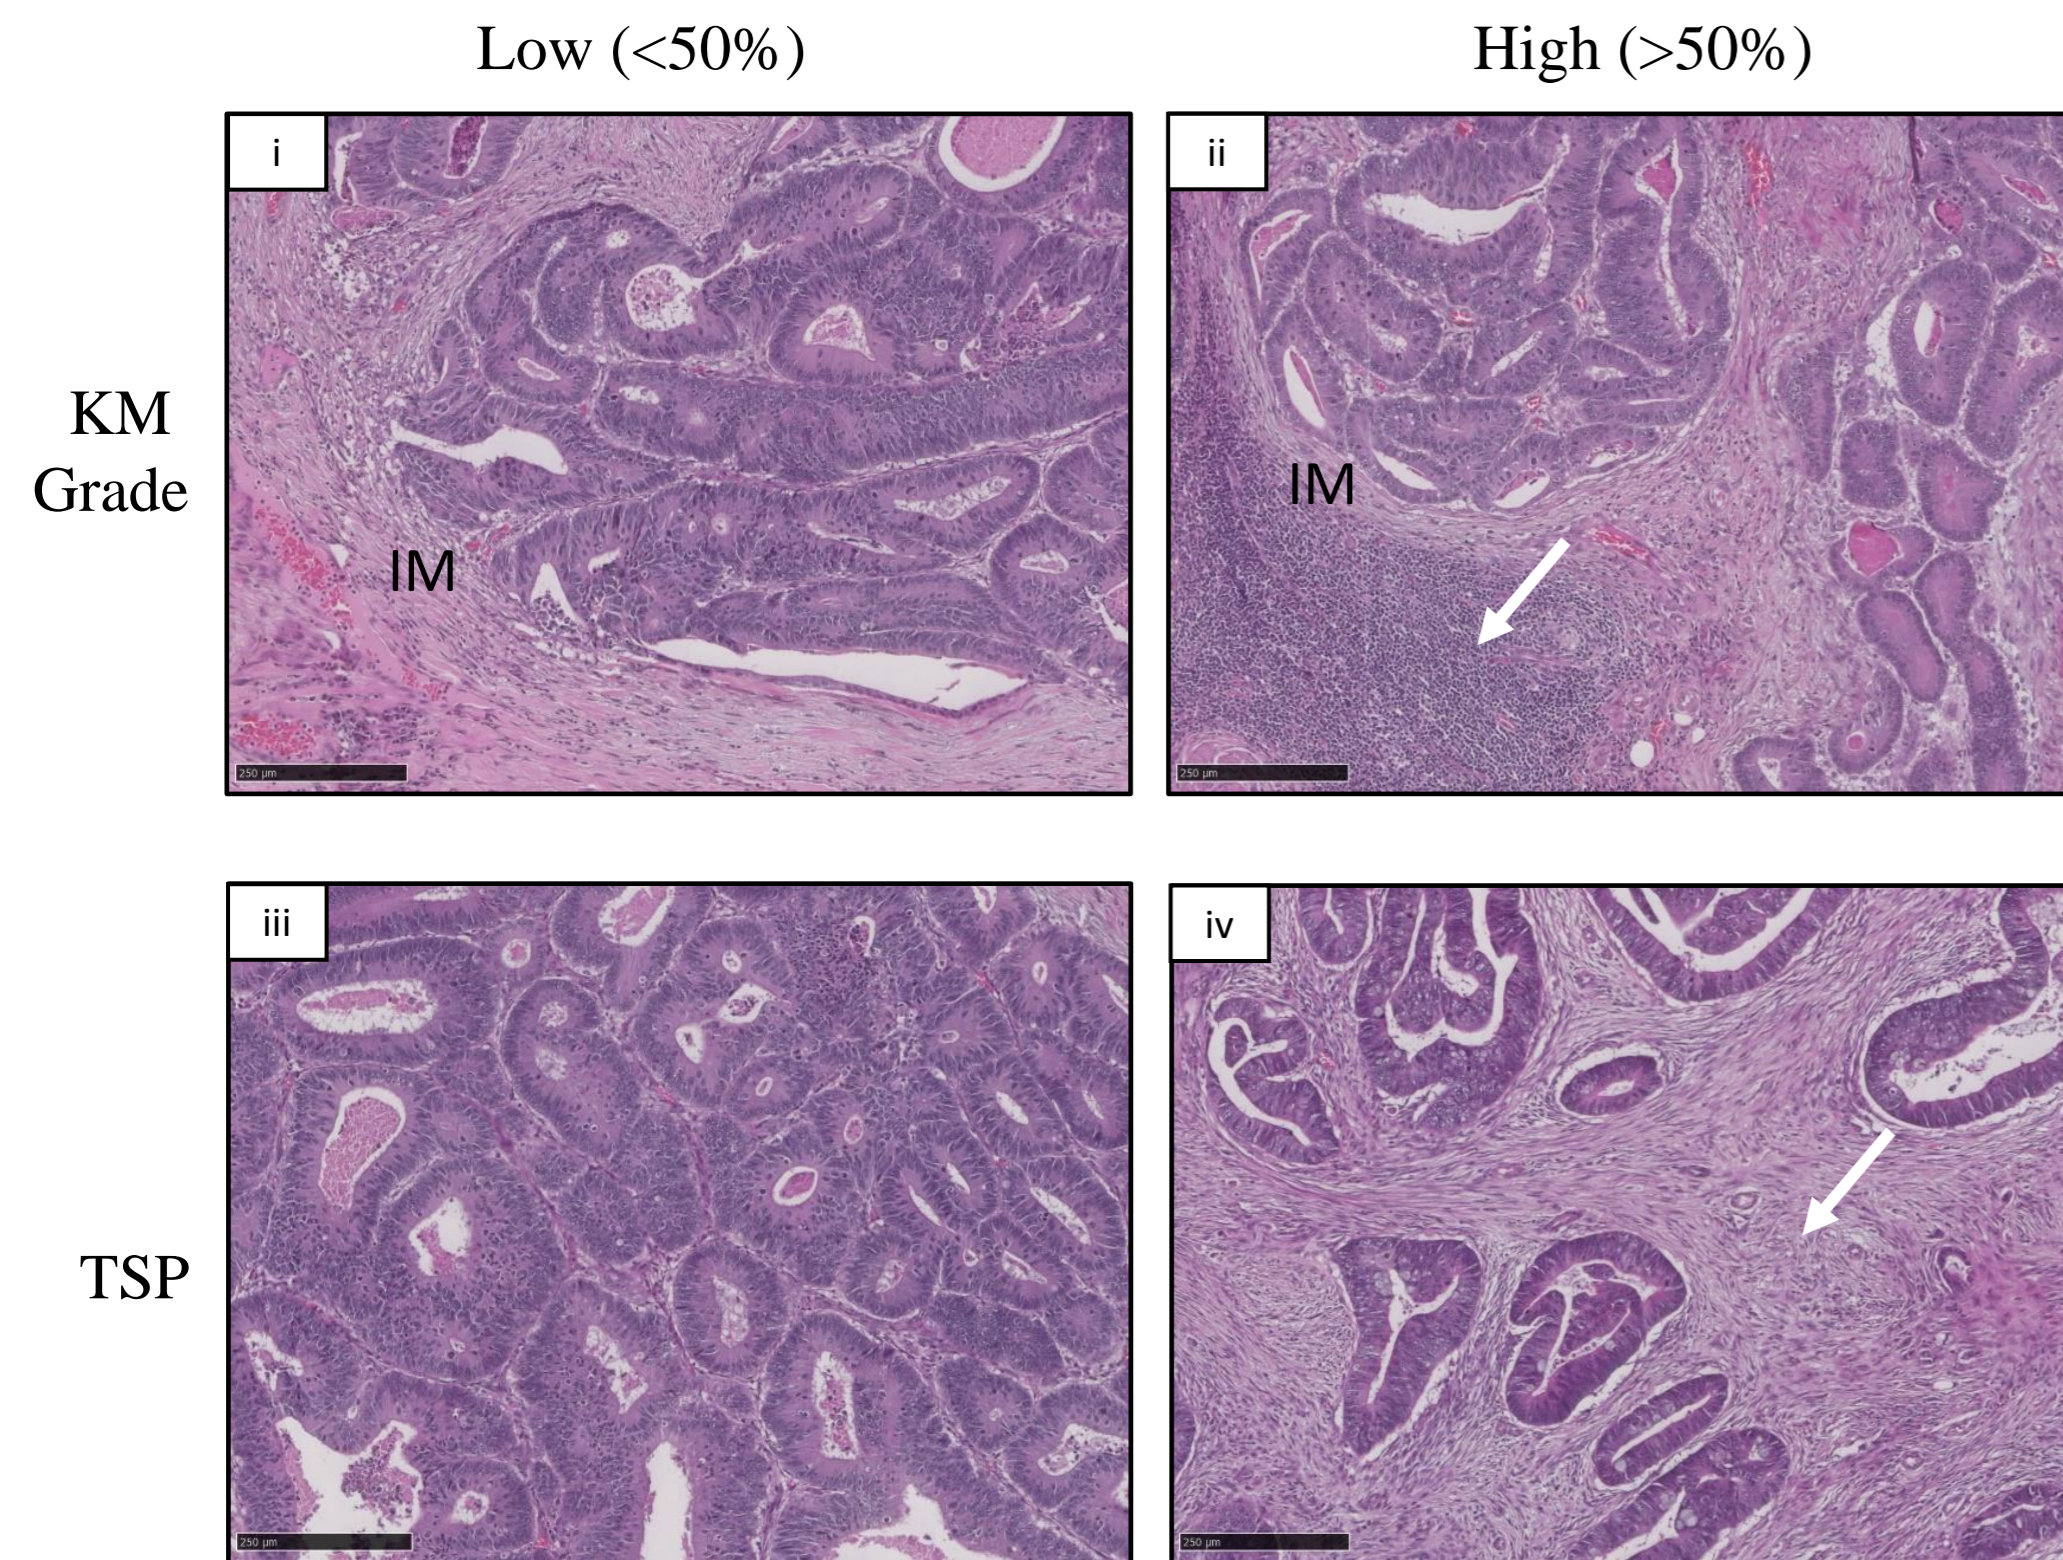

**Supplementary Figure 1:  
Representative images of H&E sections for scoring of Klintrup-makinen KM grade and Tumor stroma percentage) TSP of primary colorectal cancer.**

Images taken at x10 magnification (NDP Viewer software), scale bar 250 $\mu$ M. (i) KM<sup>low</sup> graded tumor (ii) KM<sup>high</sup> tumor (high immune infiltration arrowed). (iii) low intra-tumor stromal percentage (TSP) (<50%) (iv) high (>50%) TSP tumor (stromal area arrowed) . IM: Invasive margin

# CD3 COLONIC PRIMARY

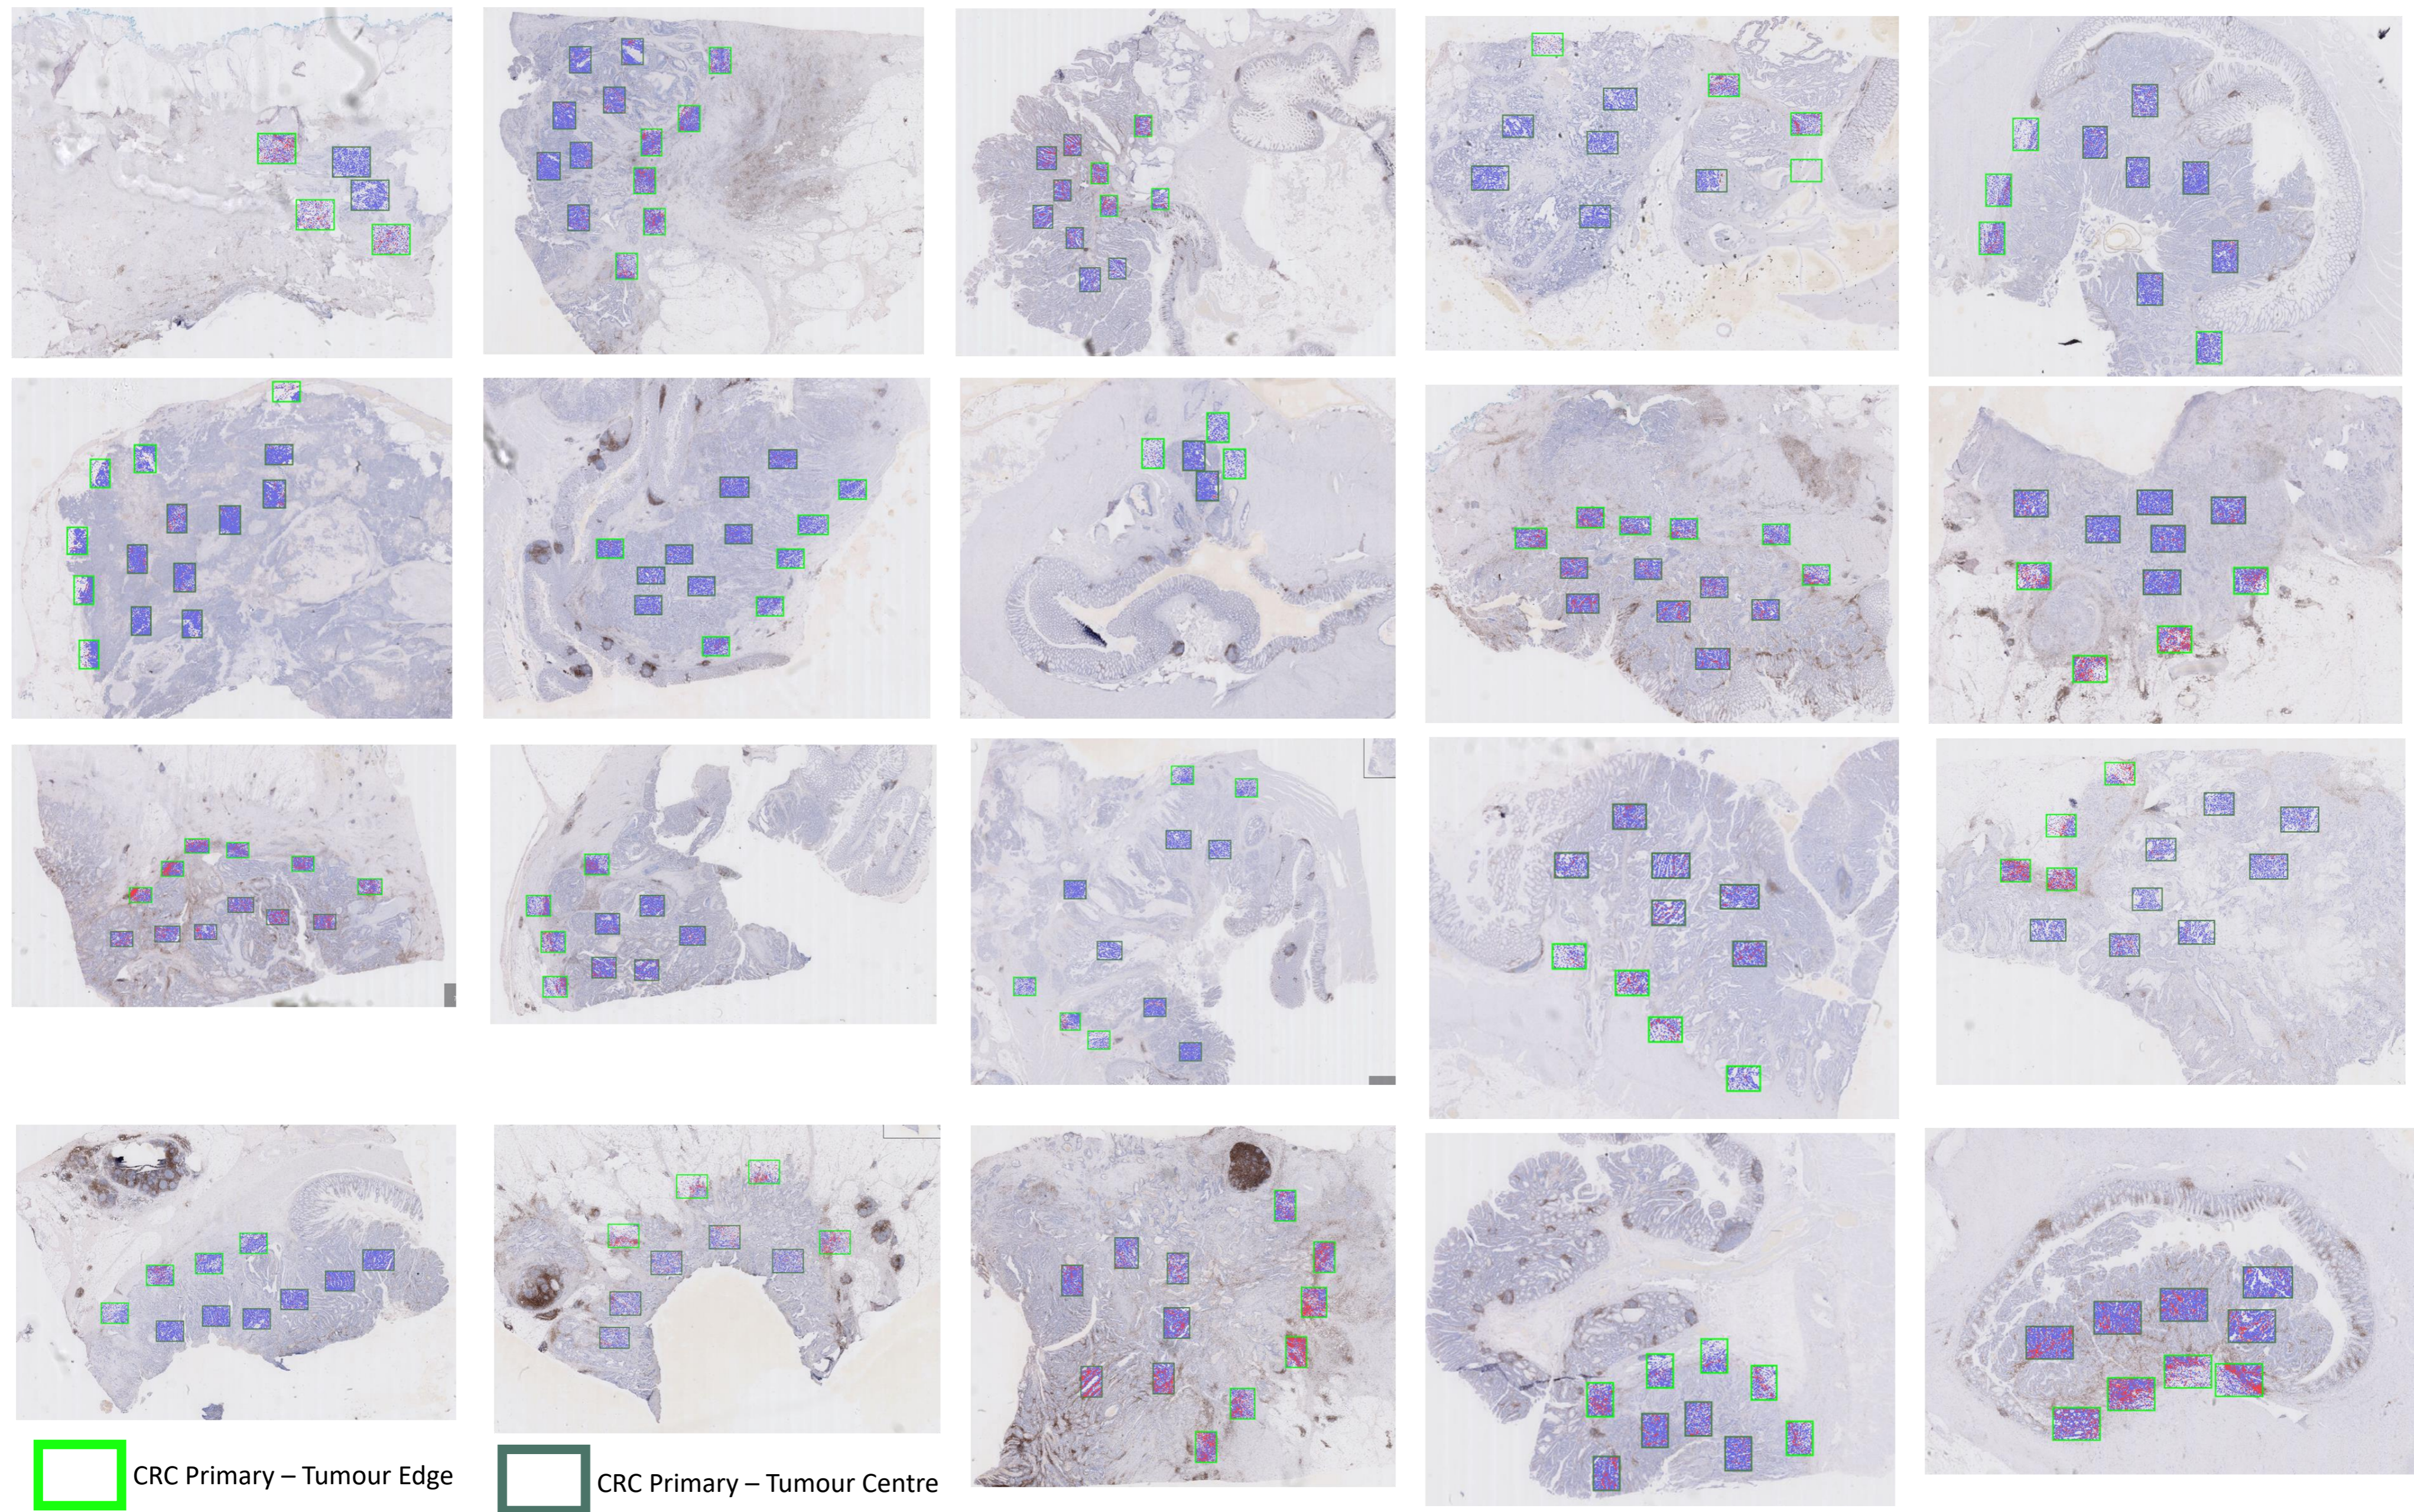

**Supplementary Figure 2a:**

## **Representative images of CD3 stained IHC of Colorectal Cancer Primary**

CRC: Colorectal Cancer CRLM: Colorectal Liver Metastasis

# CD3 COLONIC PRIMARY

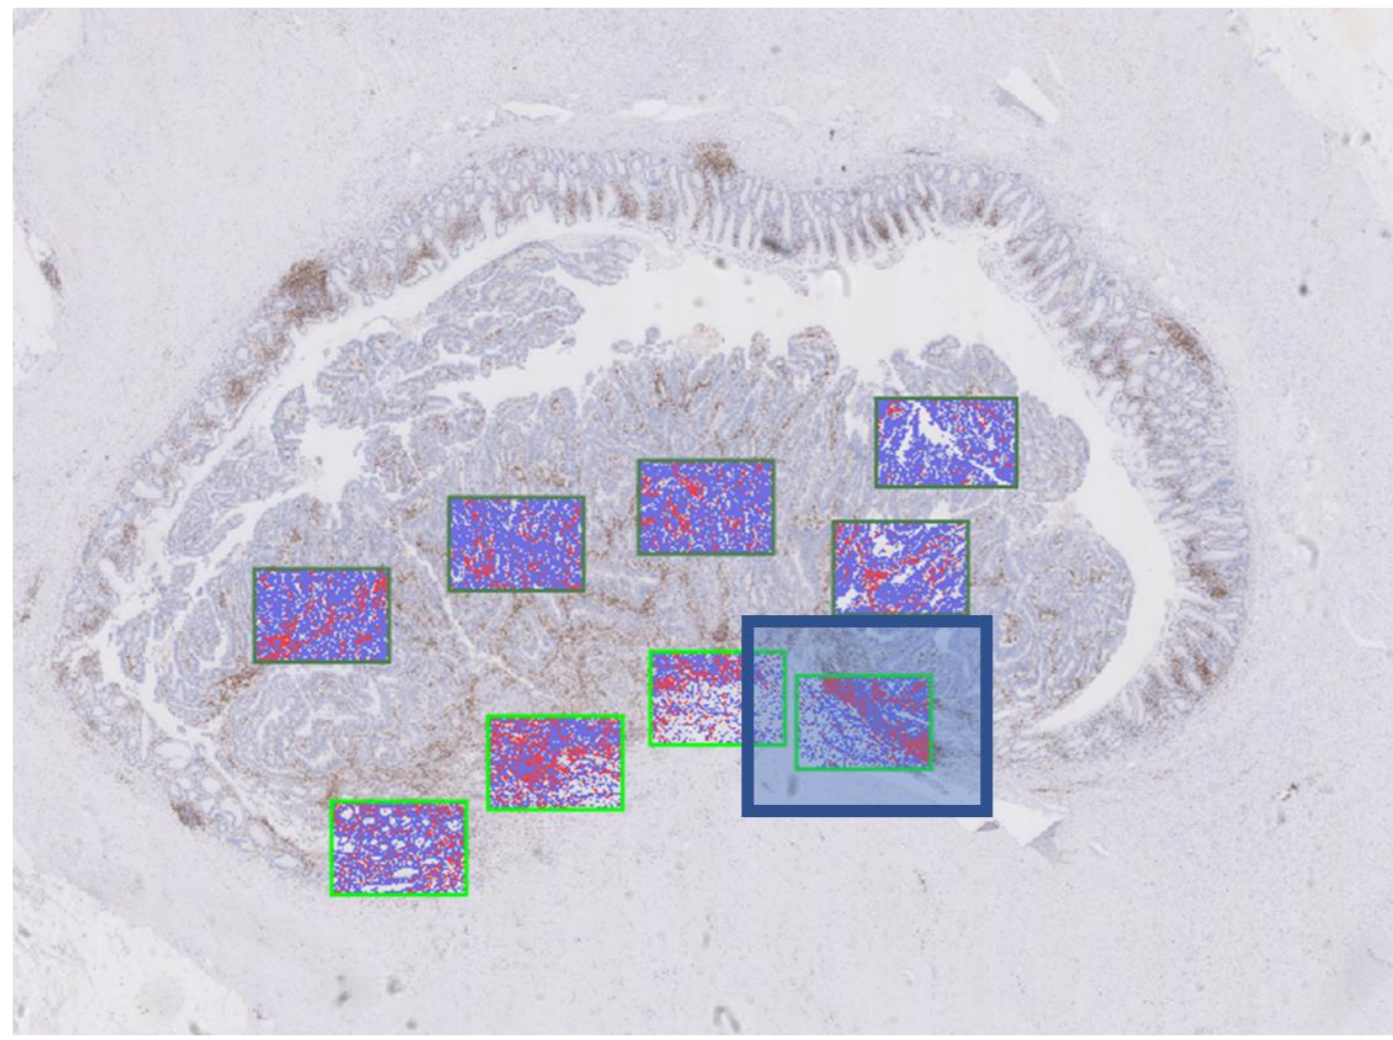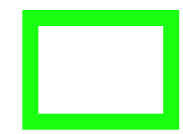

CRC Primary – Tumour Edge

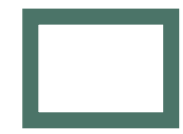

CRC Primary – Tumour Centre

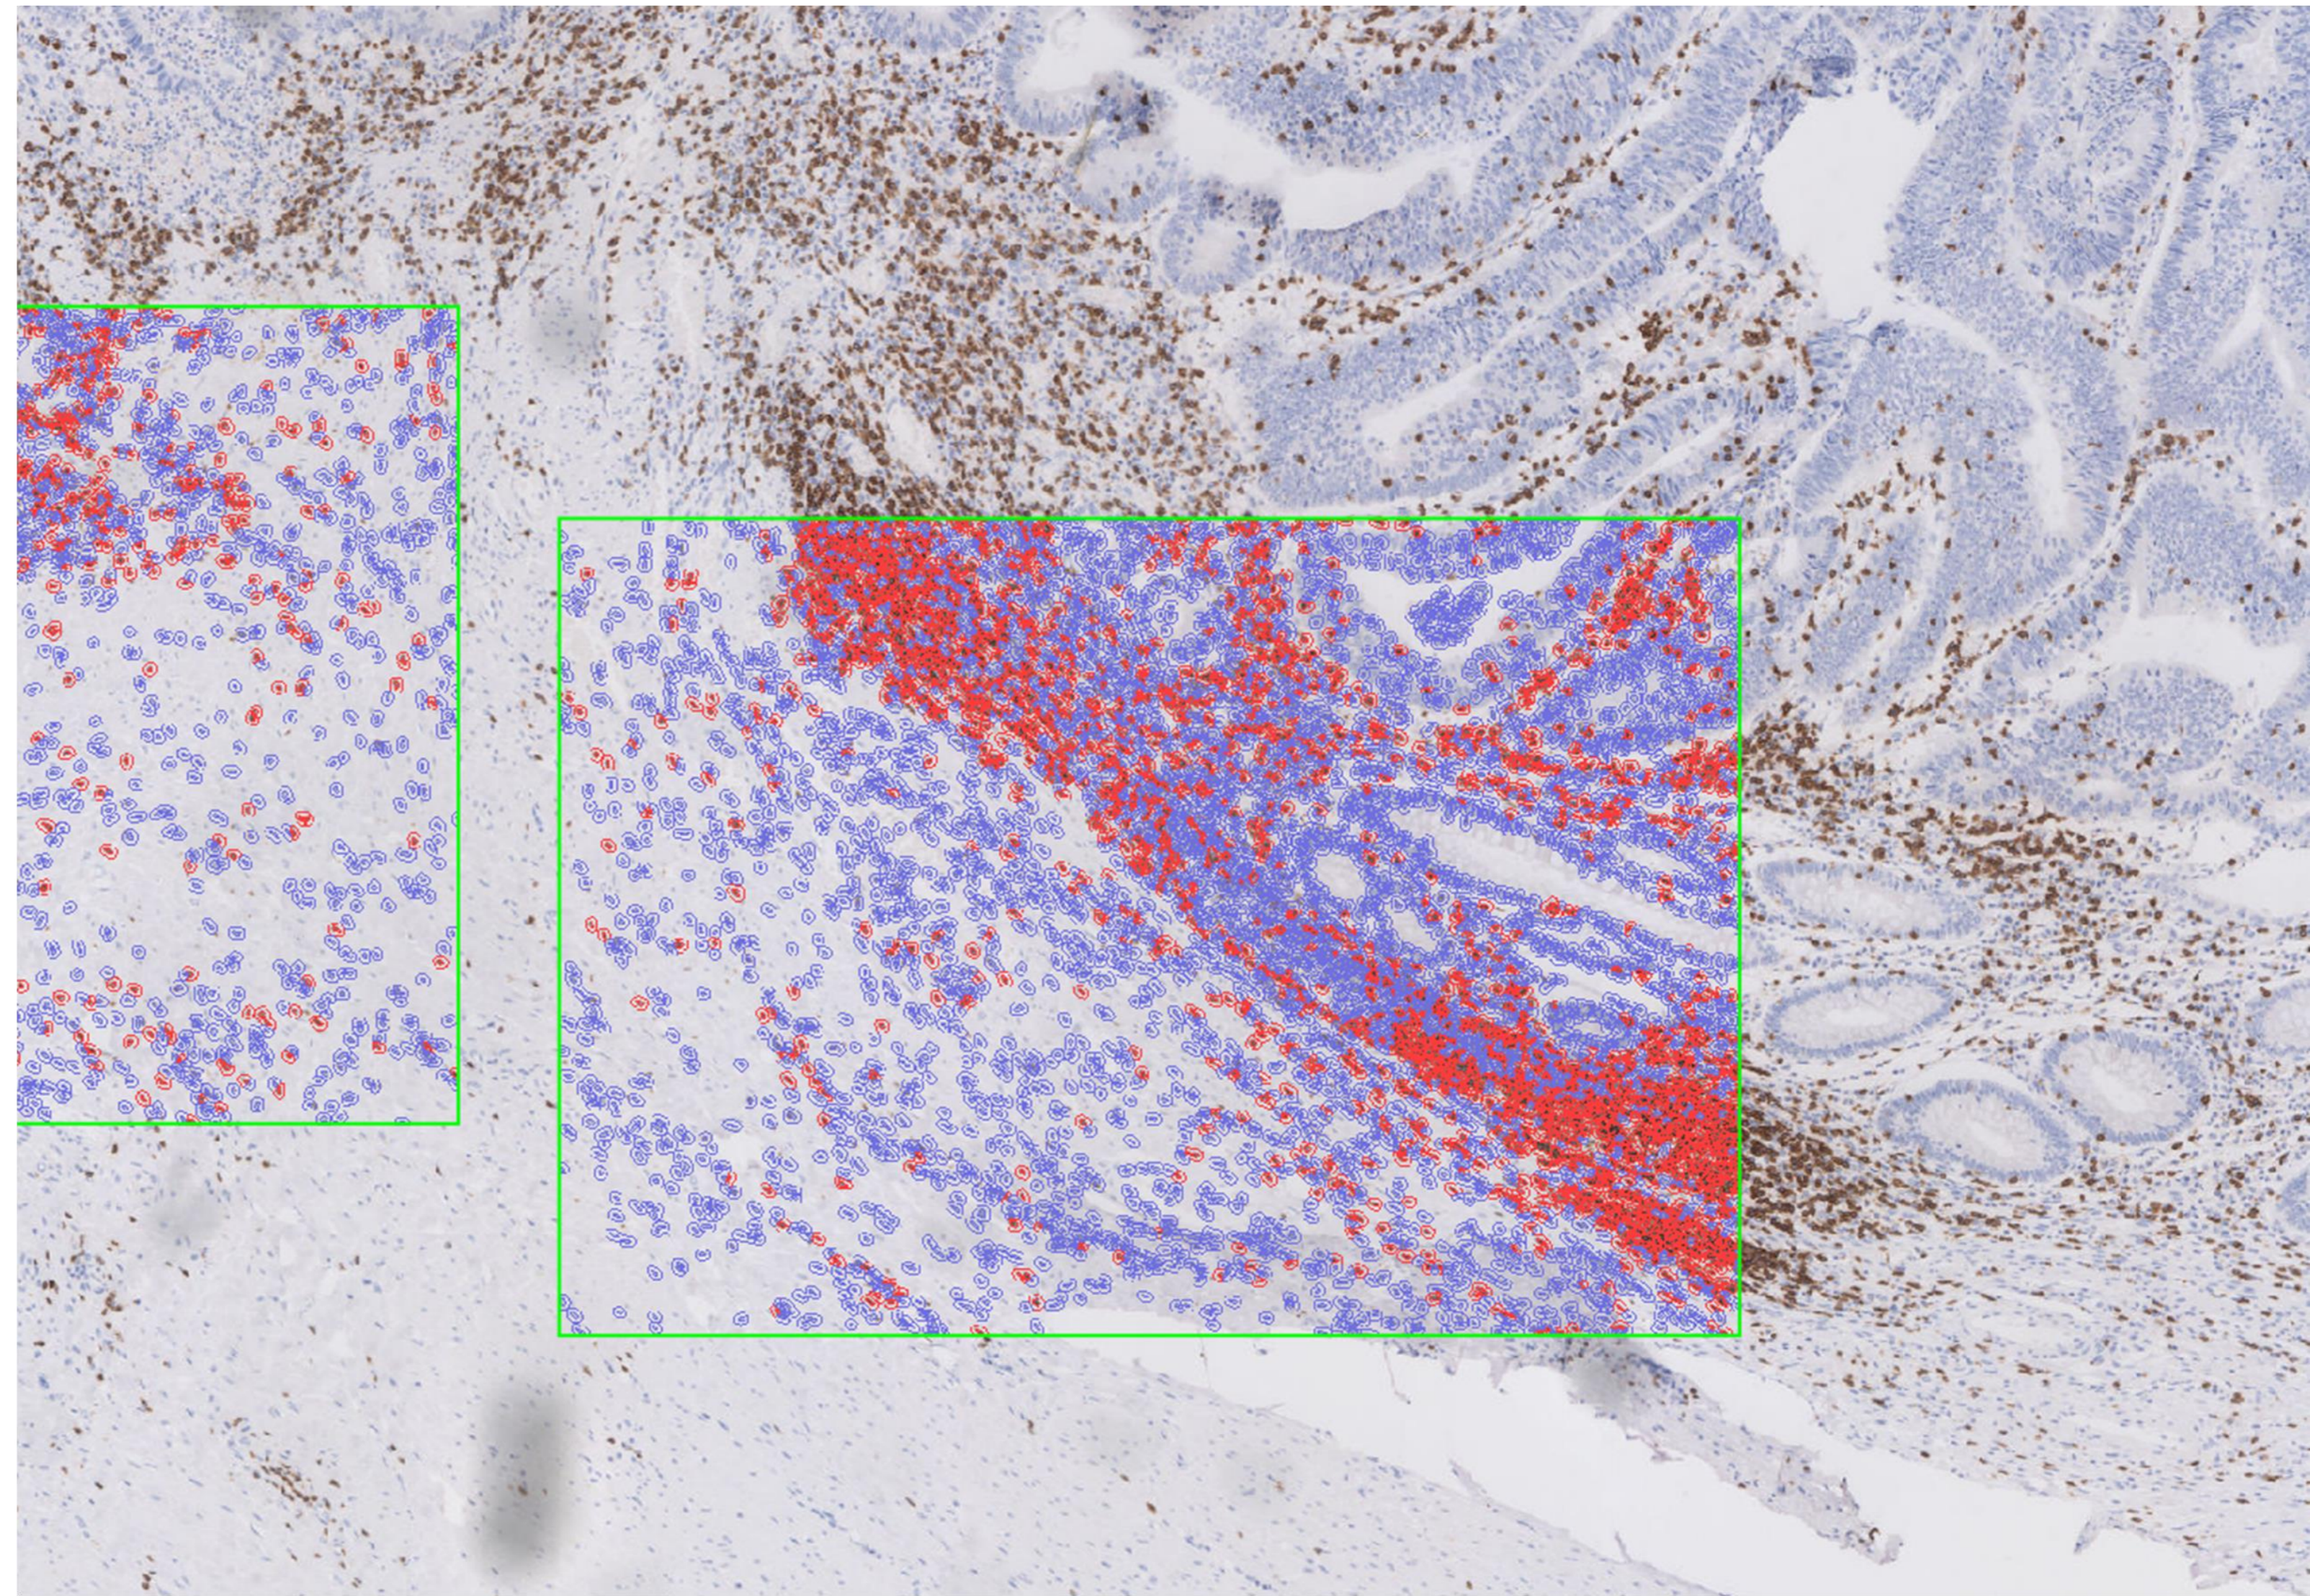

**Supplementary Figure 2b:**

**Magnified representative image of CD3 stained IHC of Colorectal Cancer Primary**

CRC: Colorectal Cancer CRLM: Colorectal Liver Metastasis

# CD3 LIVER METASTASES

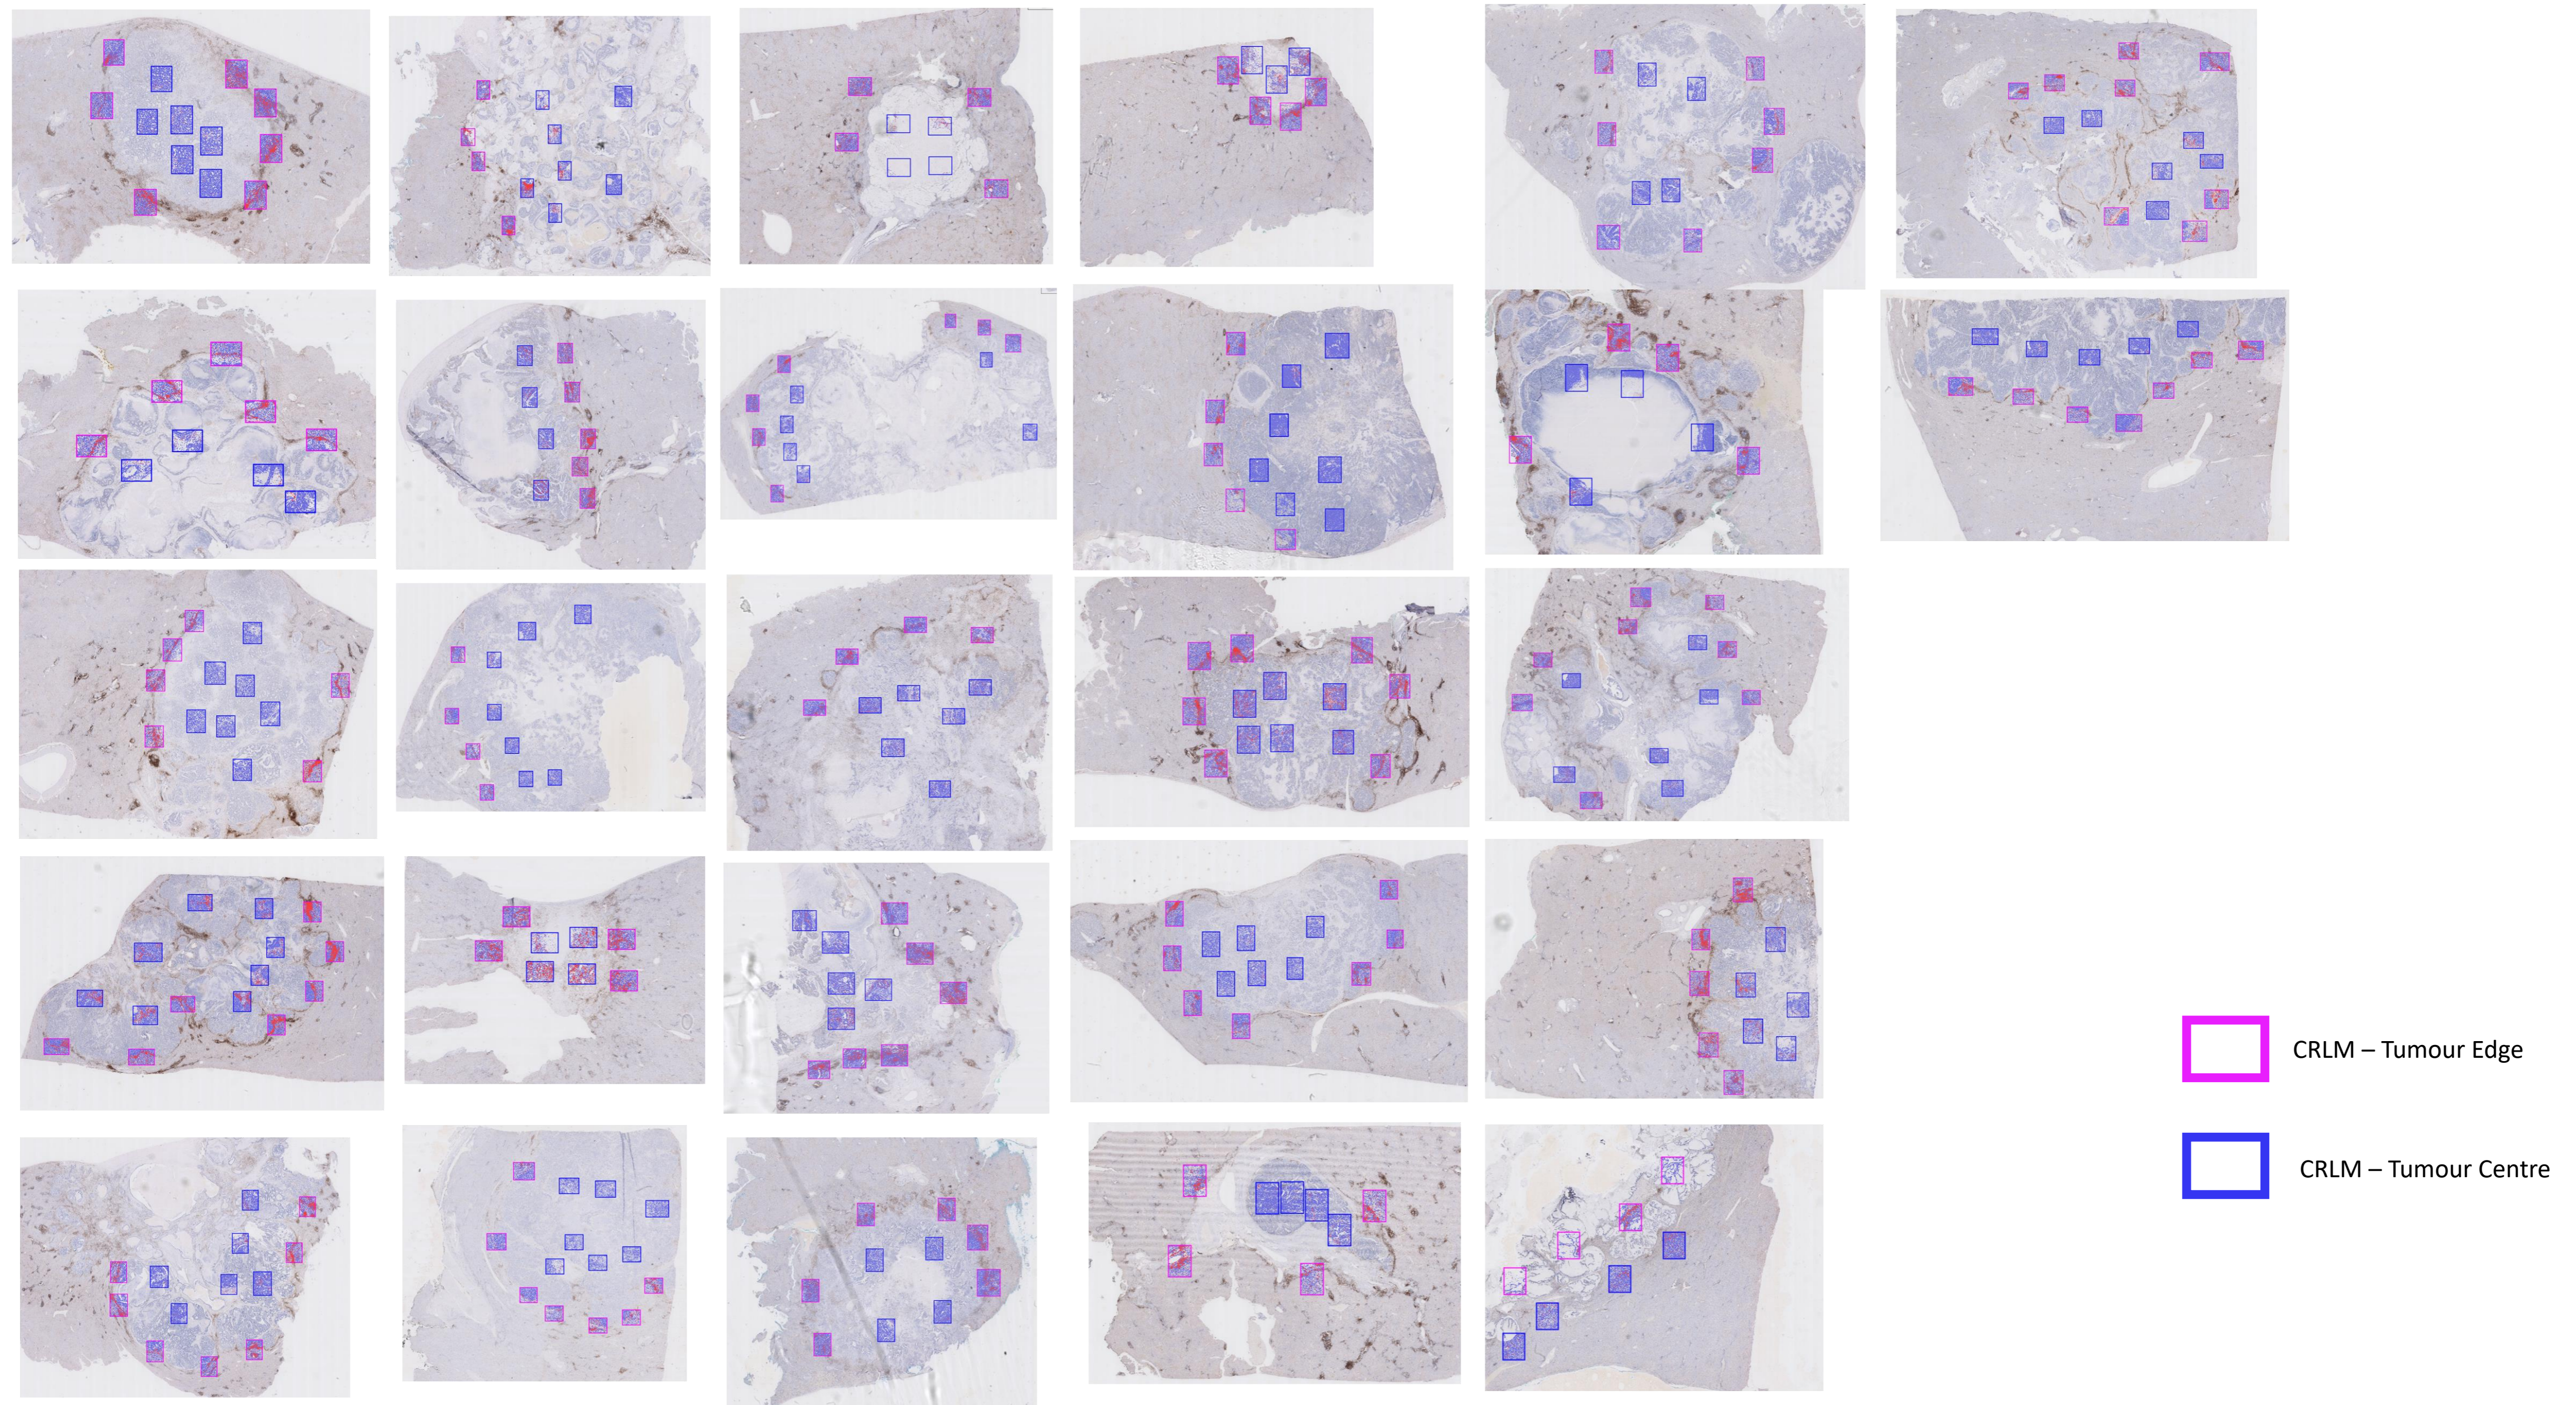

**Supplementary Figure 2c:**

**Representative images of CD3 stained IHC of Colorectal Cancer Liver Metastases**

CRC: Colorectal Cancer CRLM: Colorectal Liver Metastasis

# CD3 LIVER METASTASES

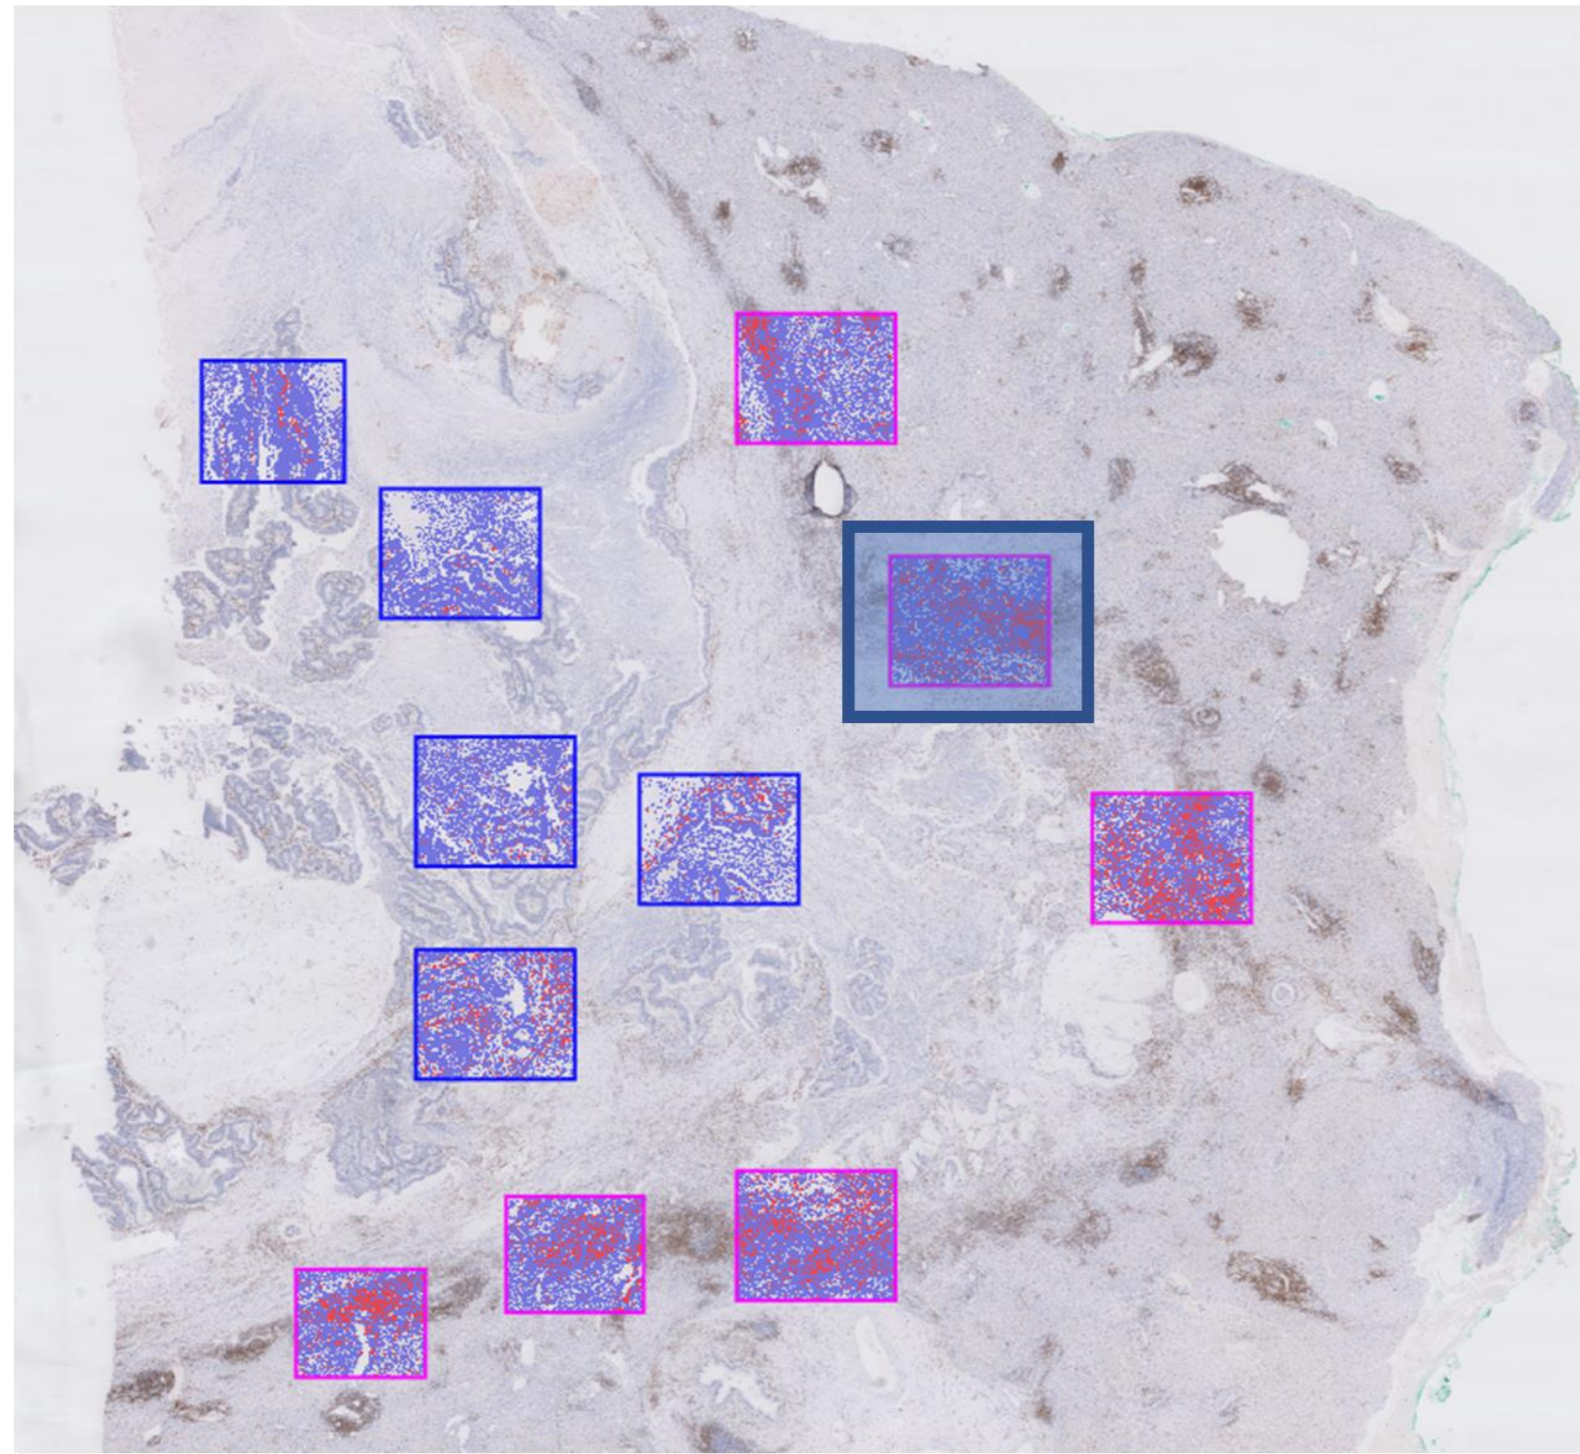

-  CRLM – Tumour Edge
-  CRLM – Tumour Centre

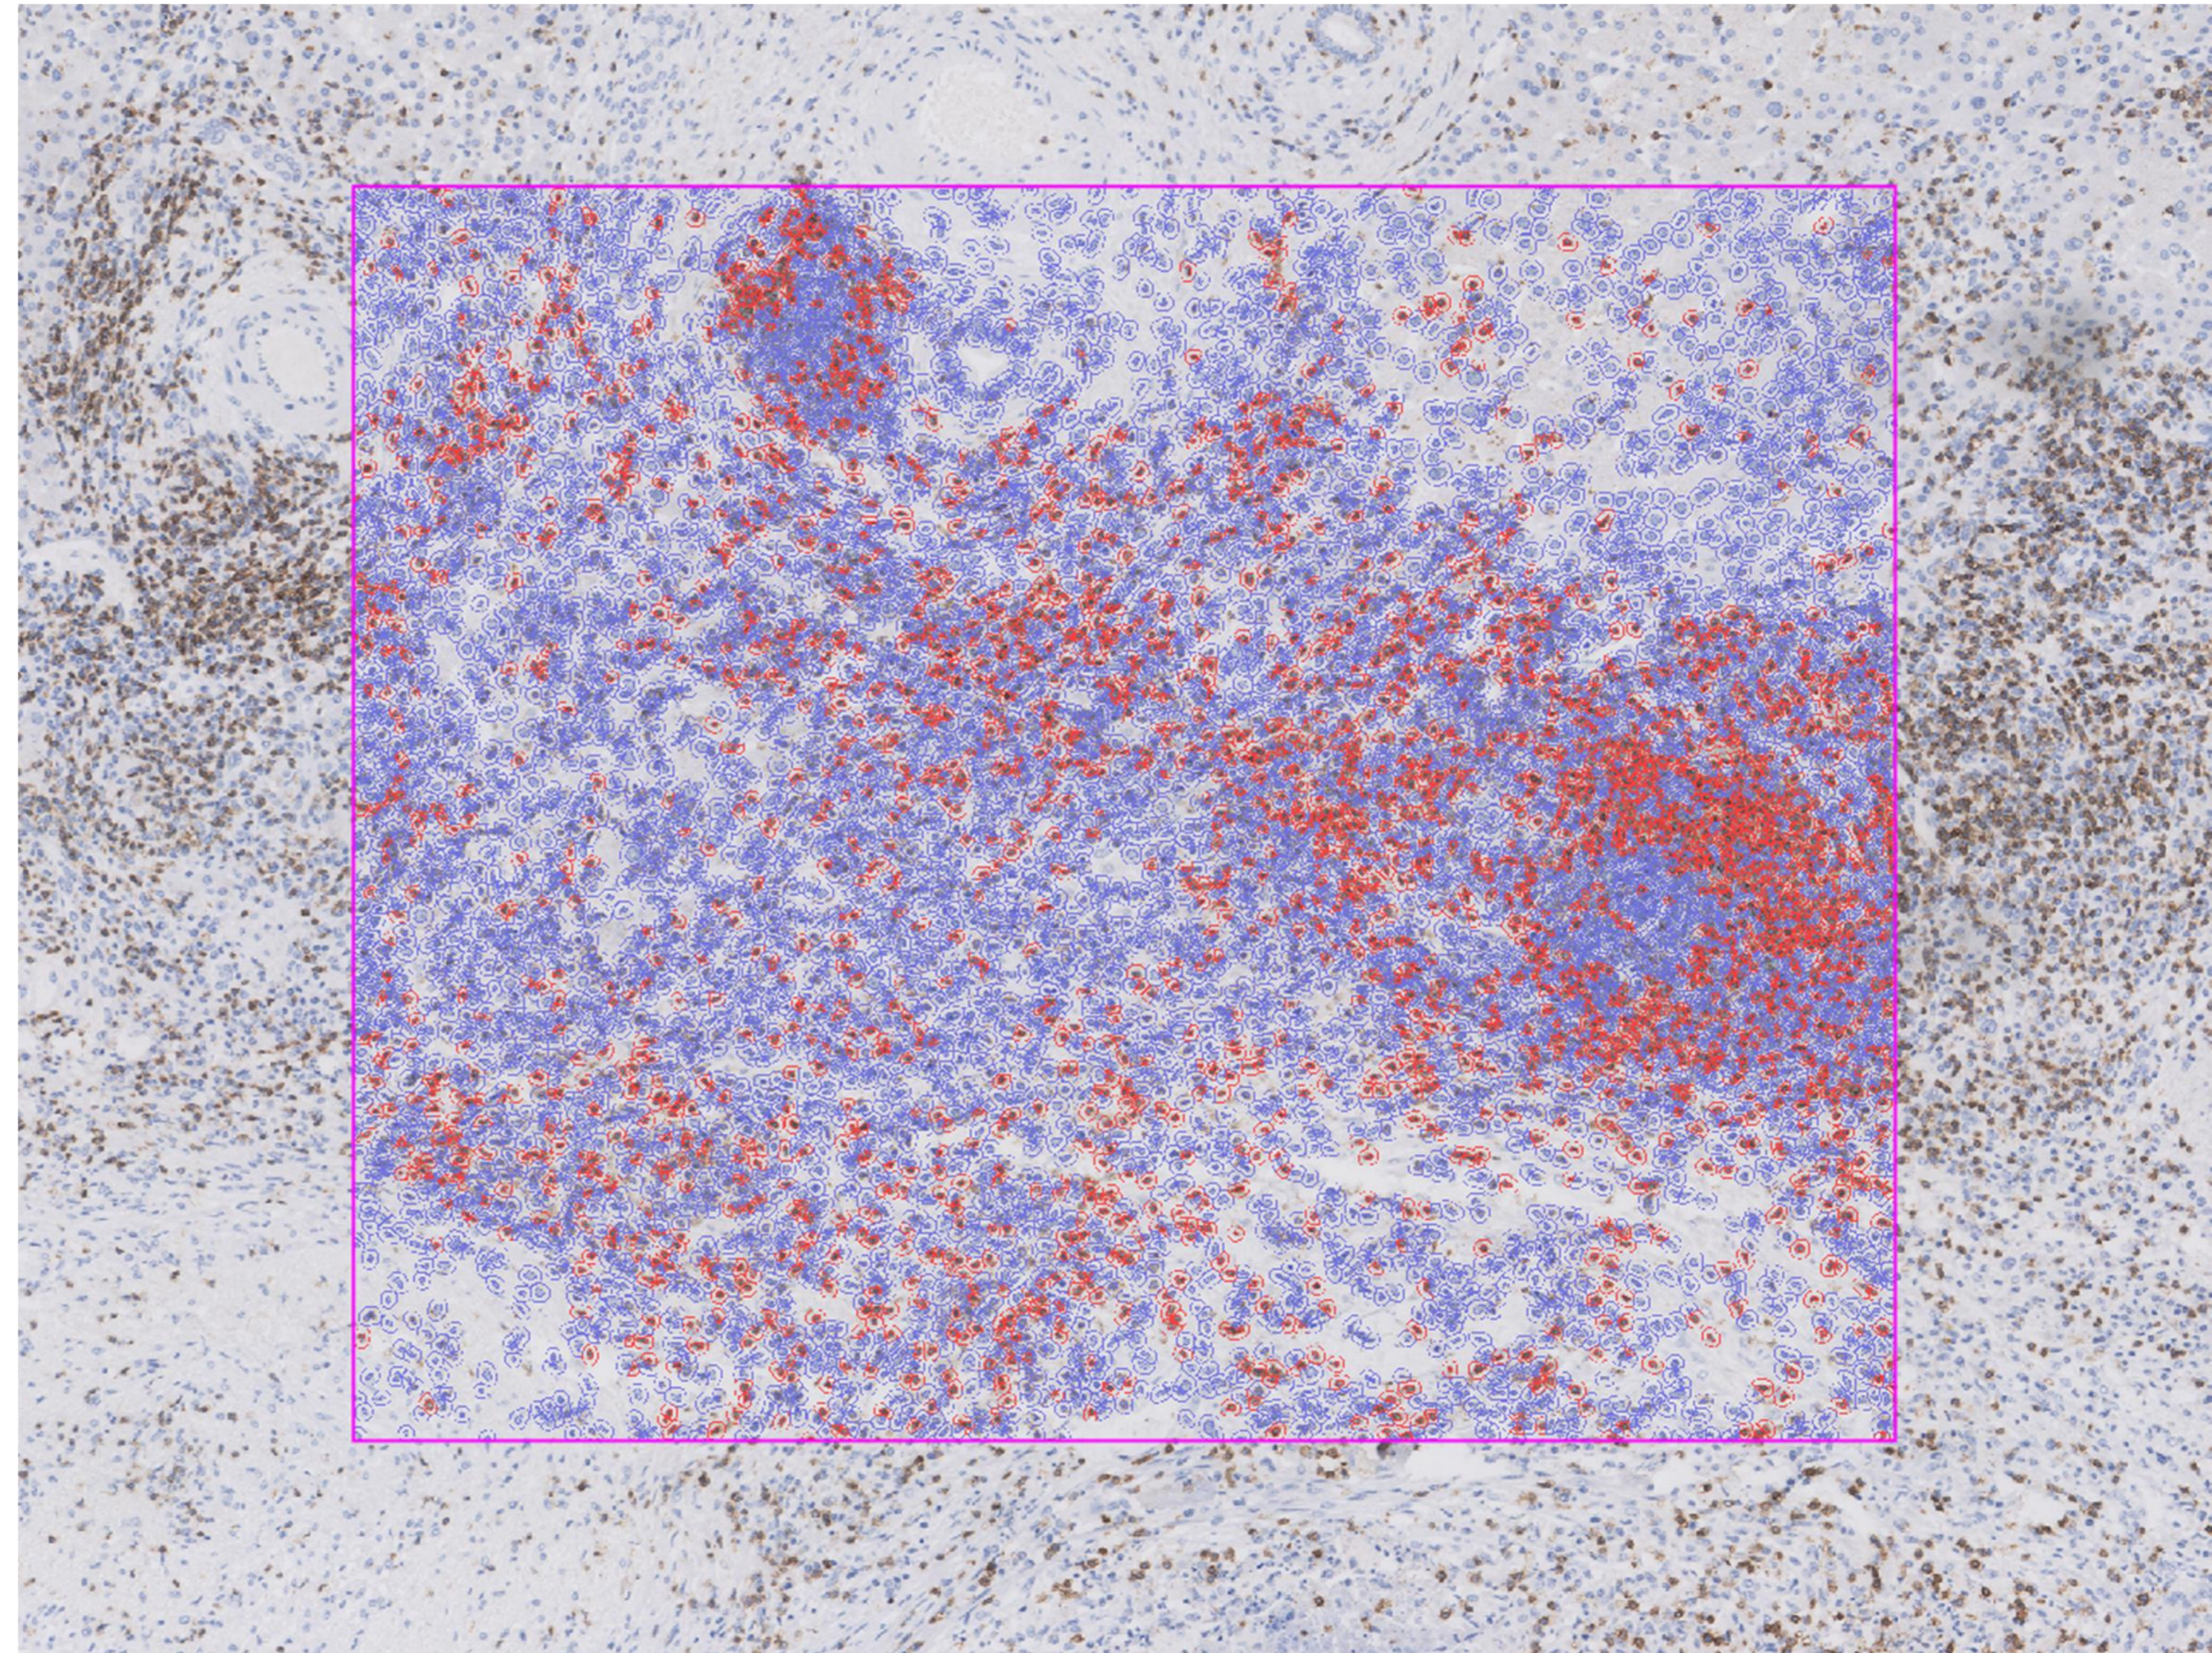

**Supplementary Figure 2d:**  
**Magnified representative images of CD3 stained IHC of Colorectal Cancer Liver Metastases**  
CRC: Colorectal Cancer CRLM: Colorectal Liver Metastasis

# CD66b COLONIC PRIMARY

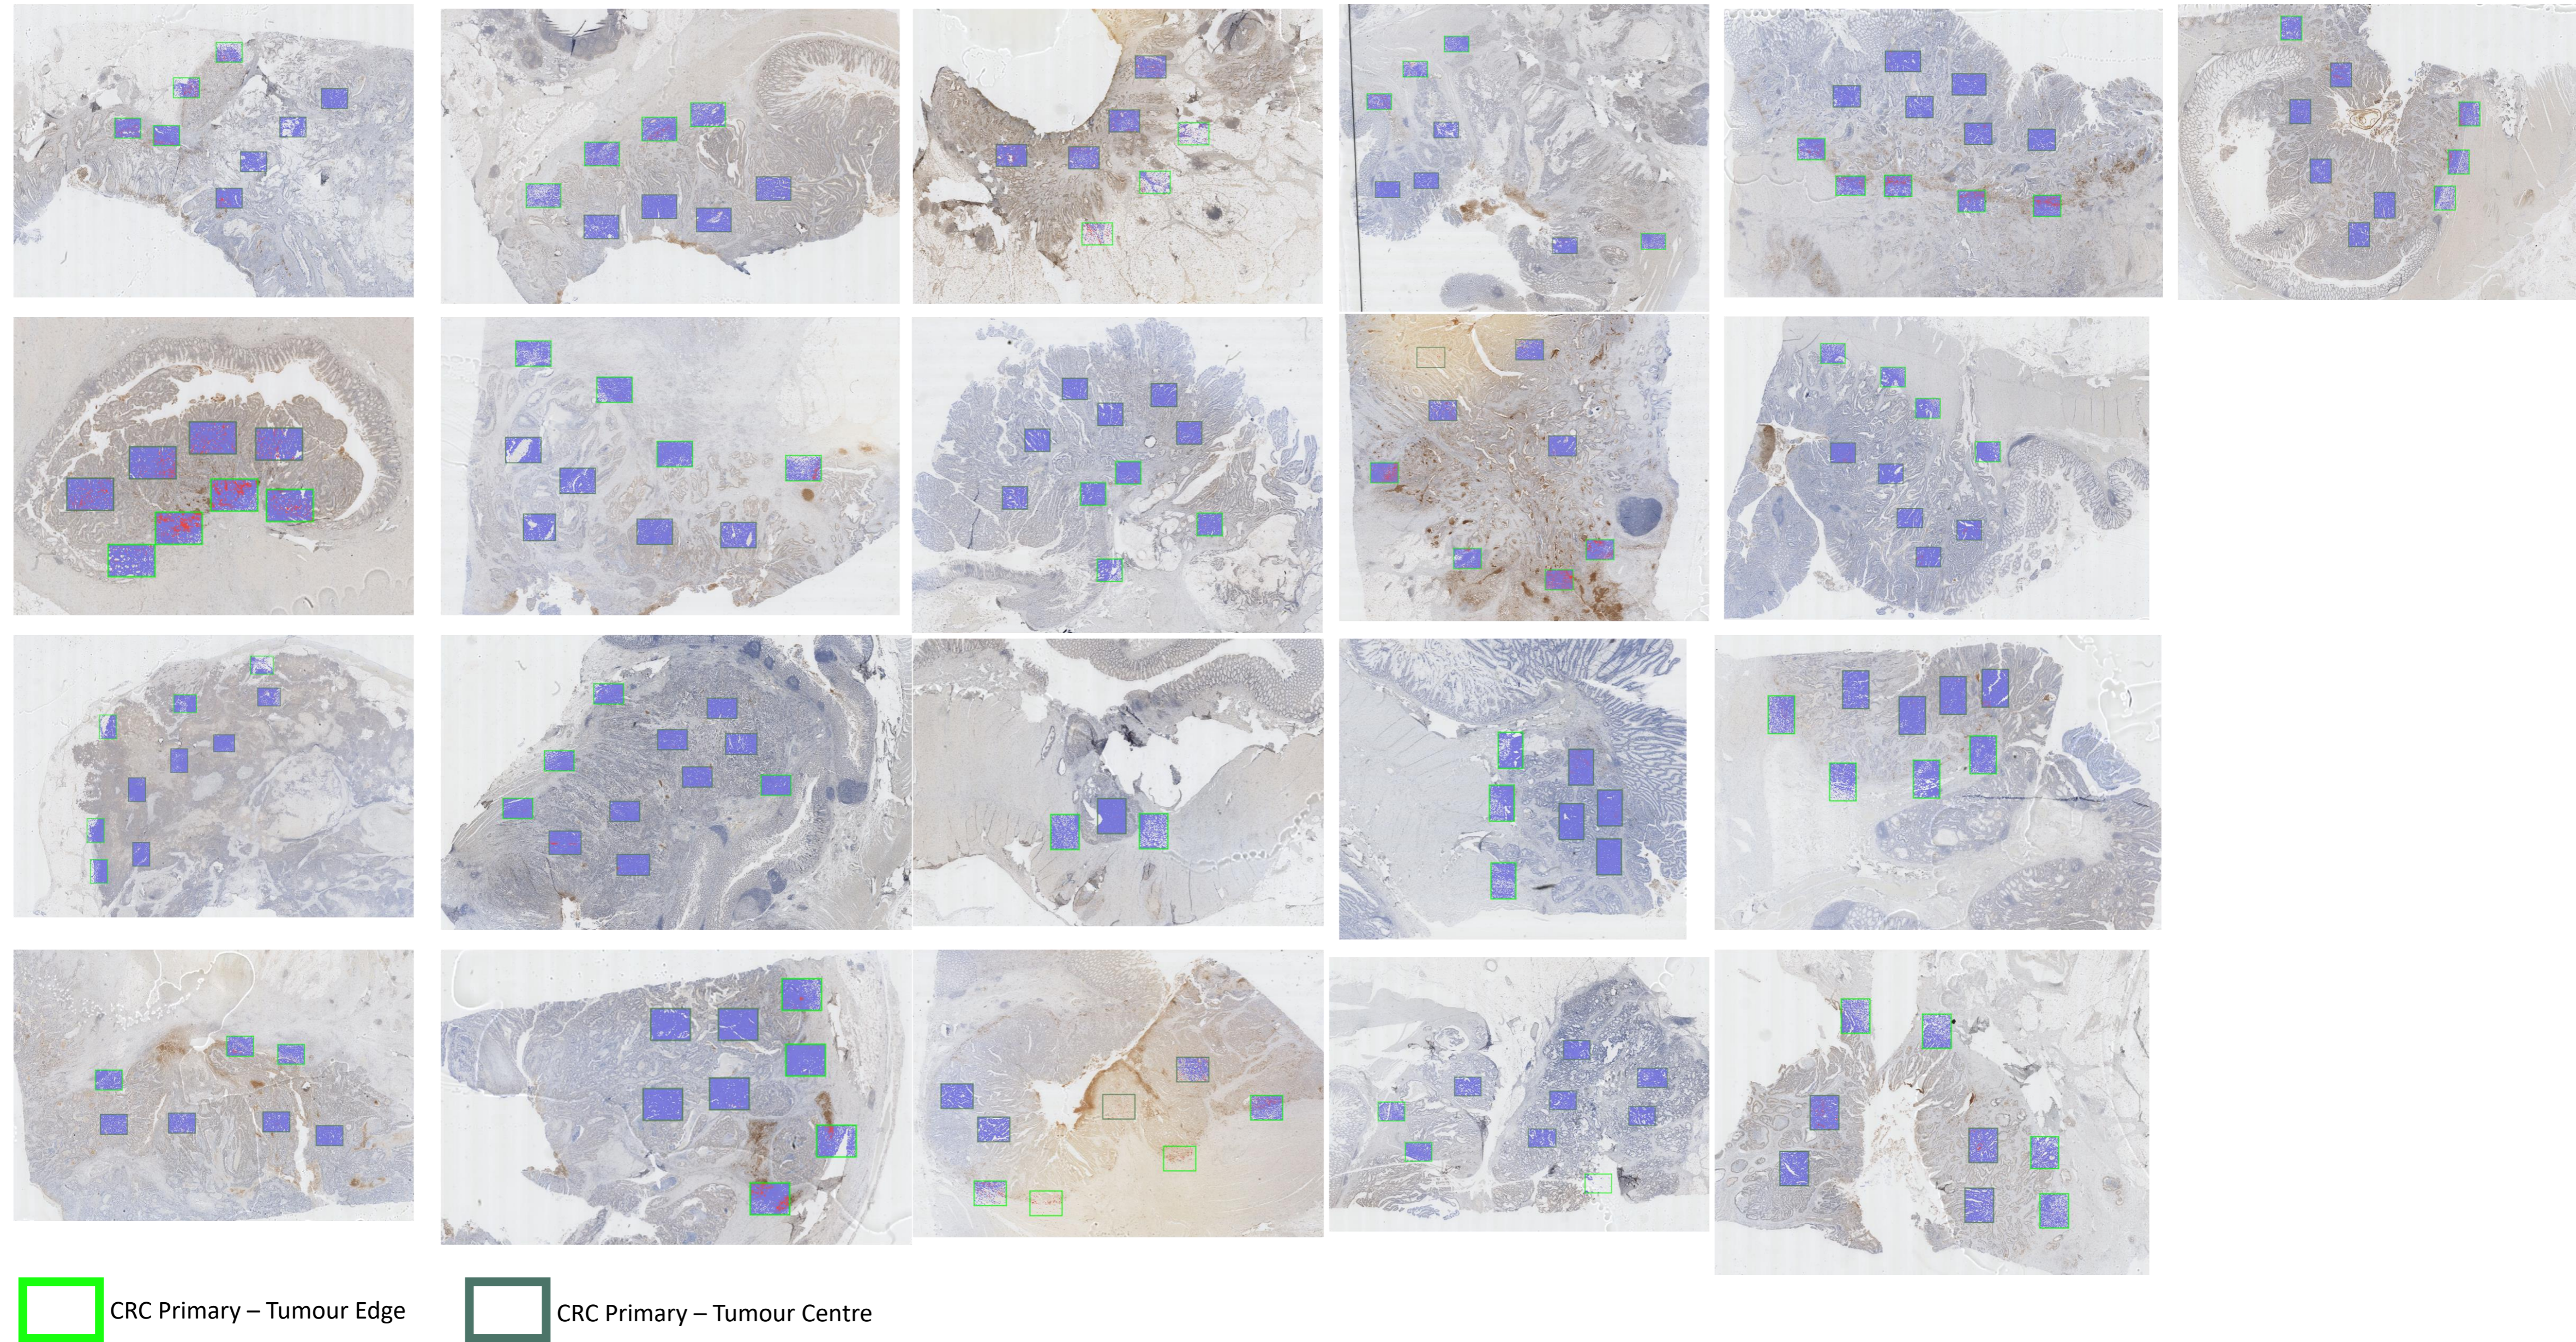

**Supplementary Figure 2e:**

**Representative images of CD66b stained IHC of Colorectal Cancer Primary**

CRC: Colorectal Cancer  
CRLM: Colorectal Liver Metastasis

# CD66b COLONIC PRIMARY

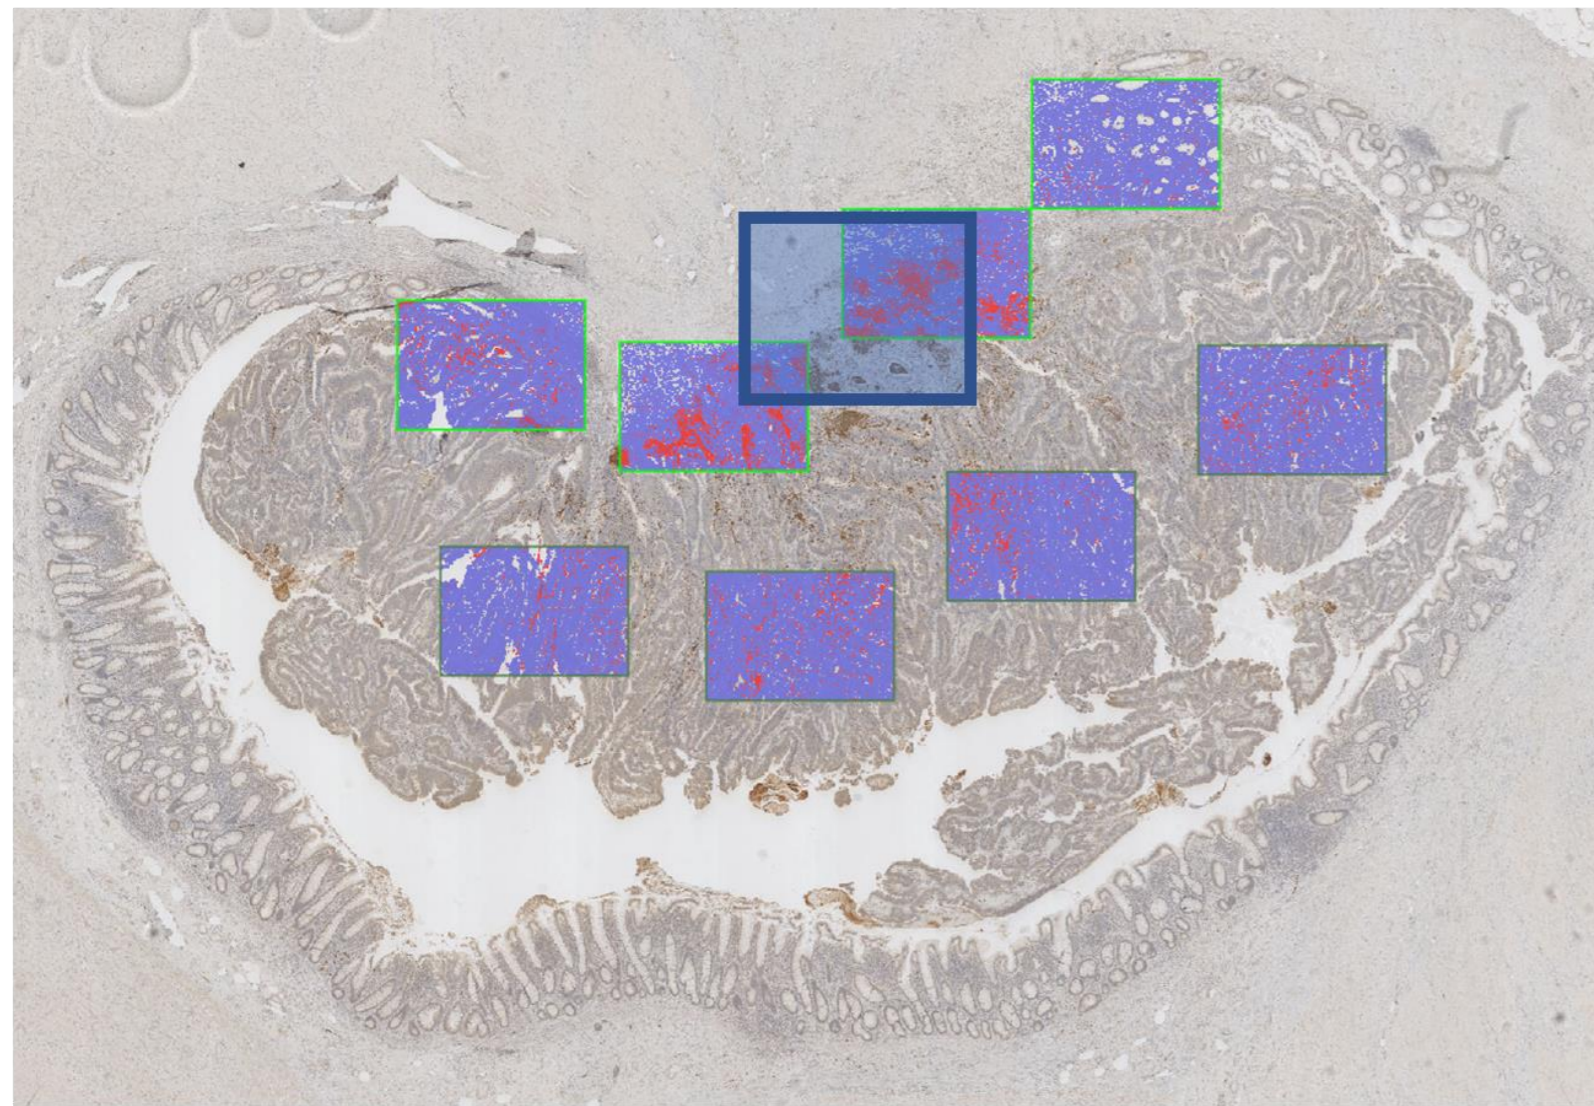

CRC Primary – Tumour Edge

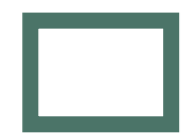

CRC Primary – Tumour Centre

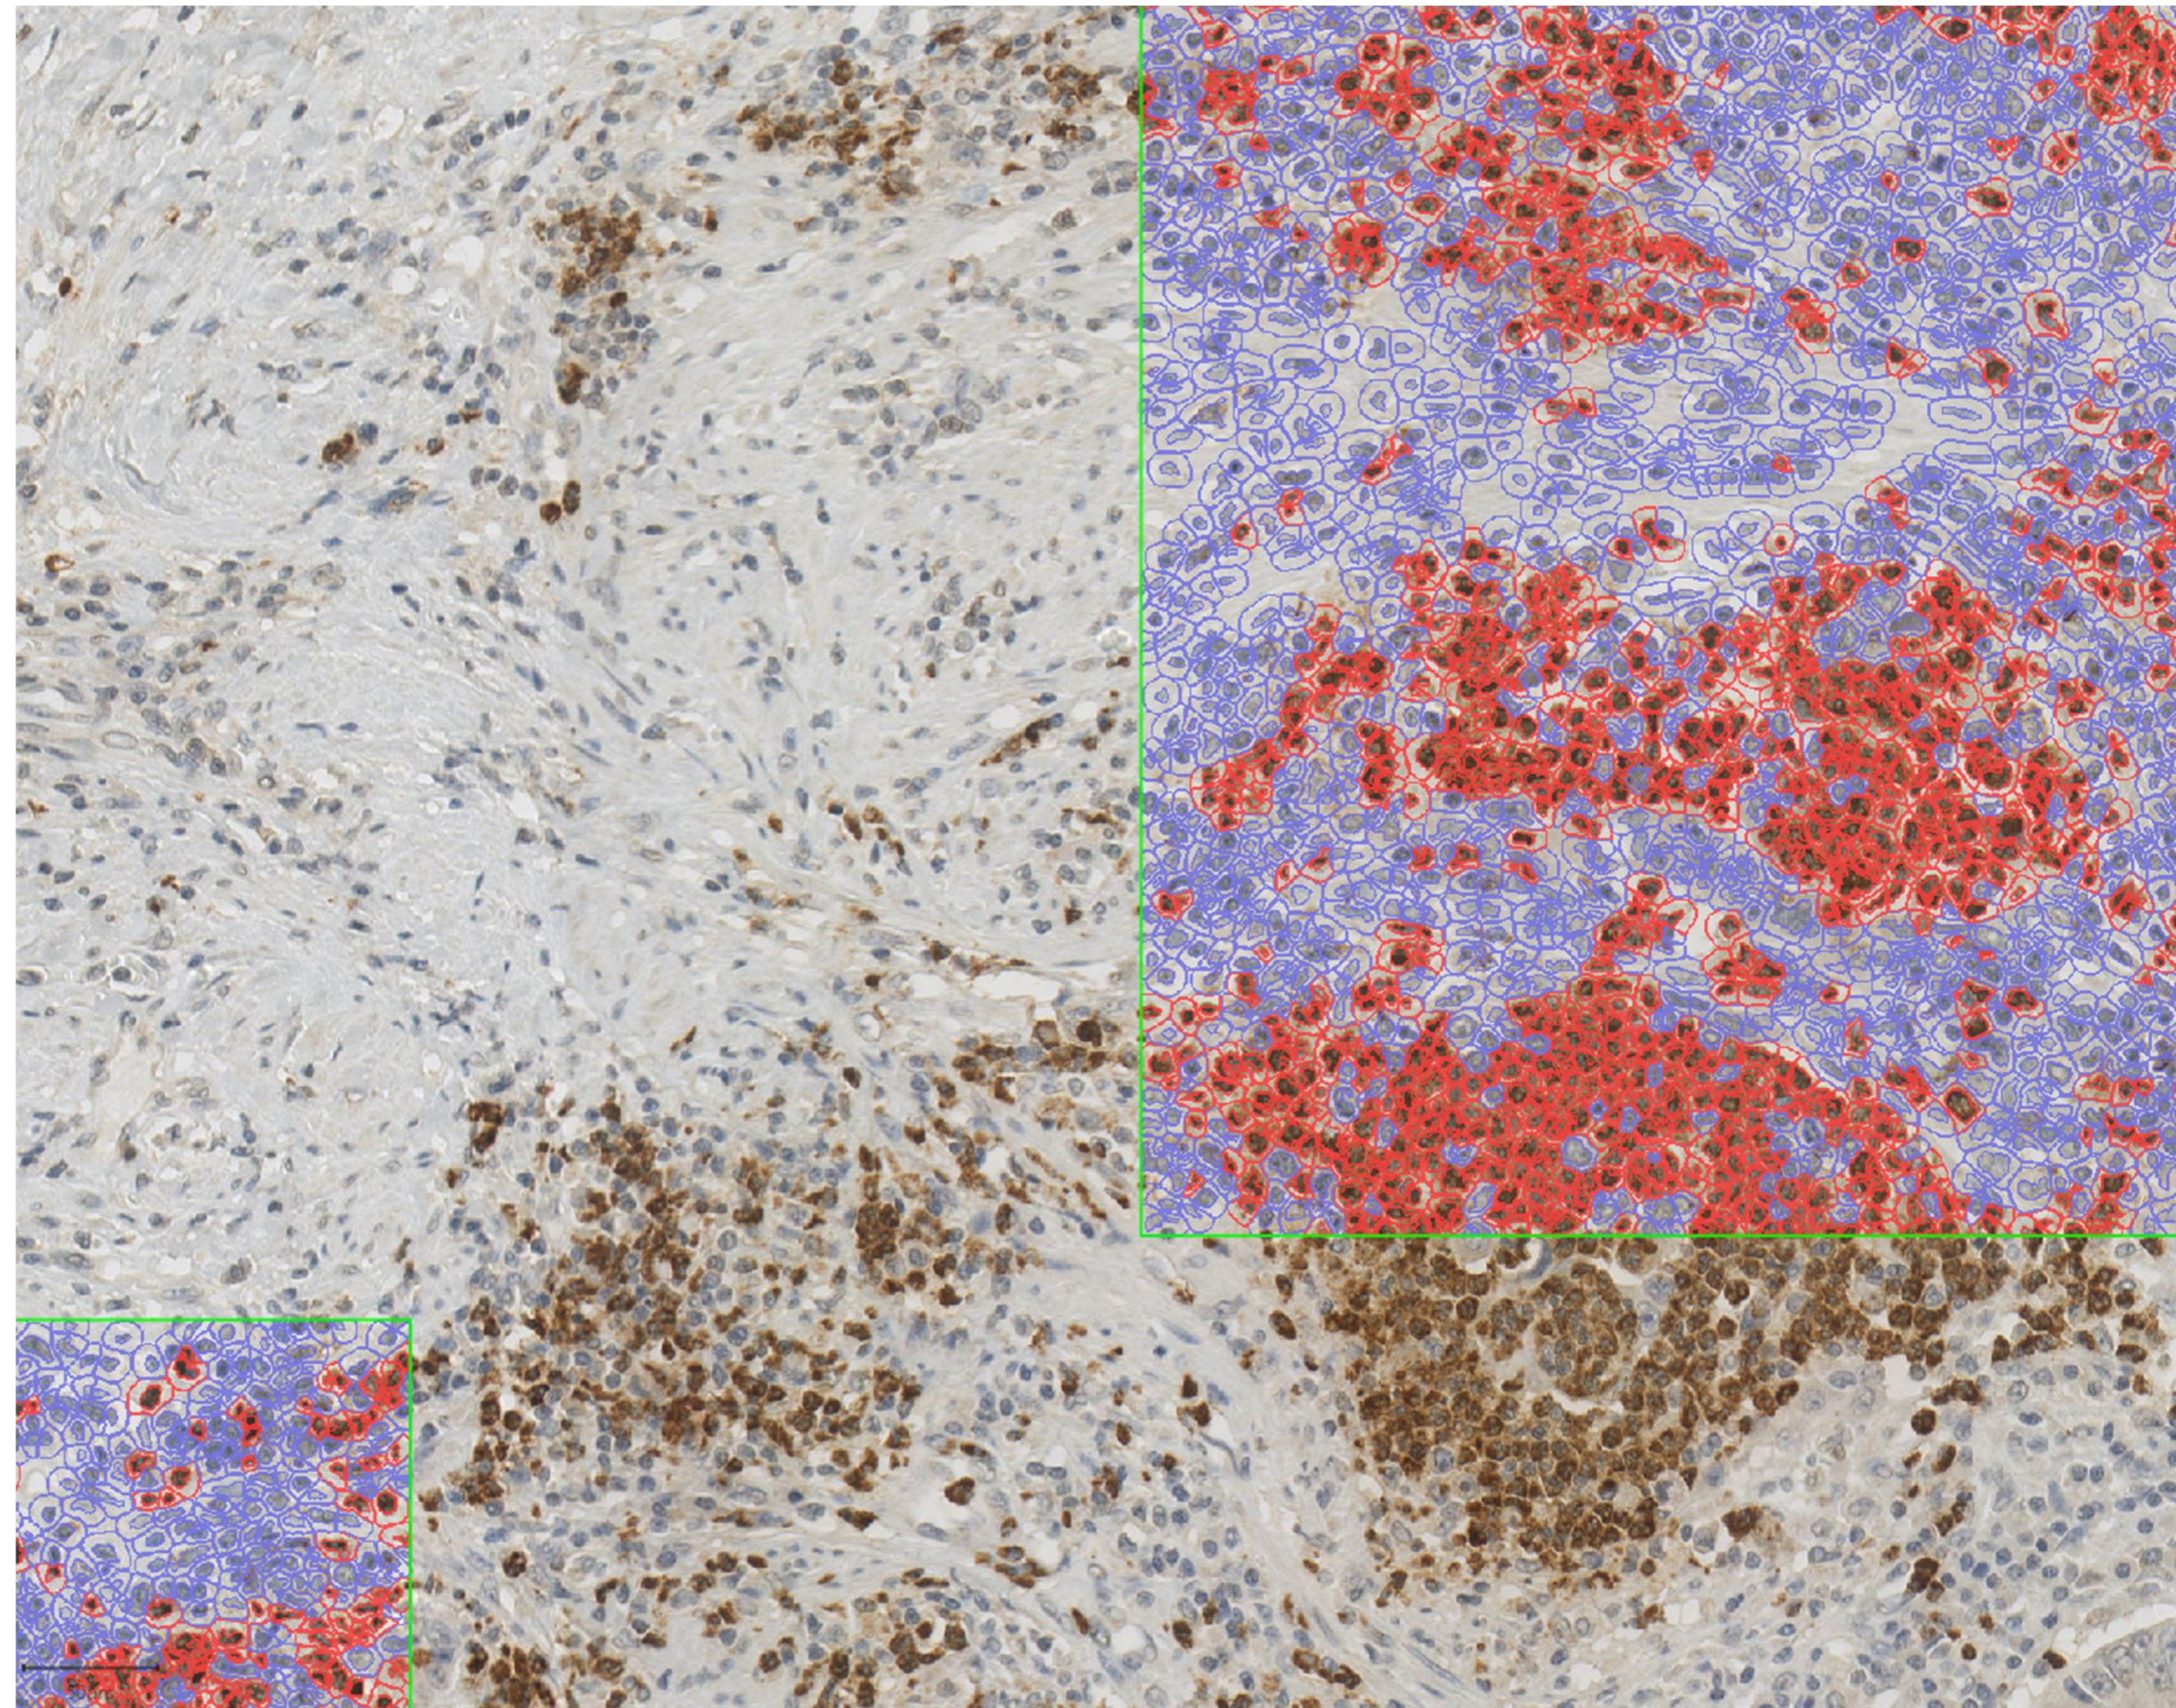

**Supplementary Figure 2f:**

**Magnified representative images of CD66b stained IHC of Colorectal Cancer Primary**

CRC: Colorectal Cancer CRLM: Colorectal Liver Metastasis



# CD66b LIVER METASTASES

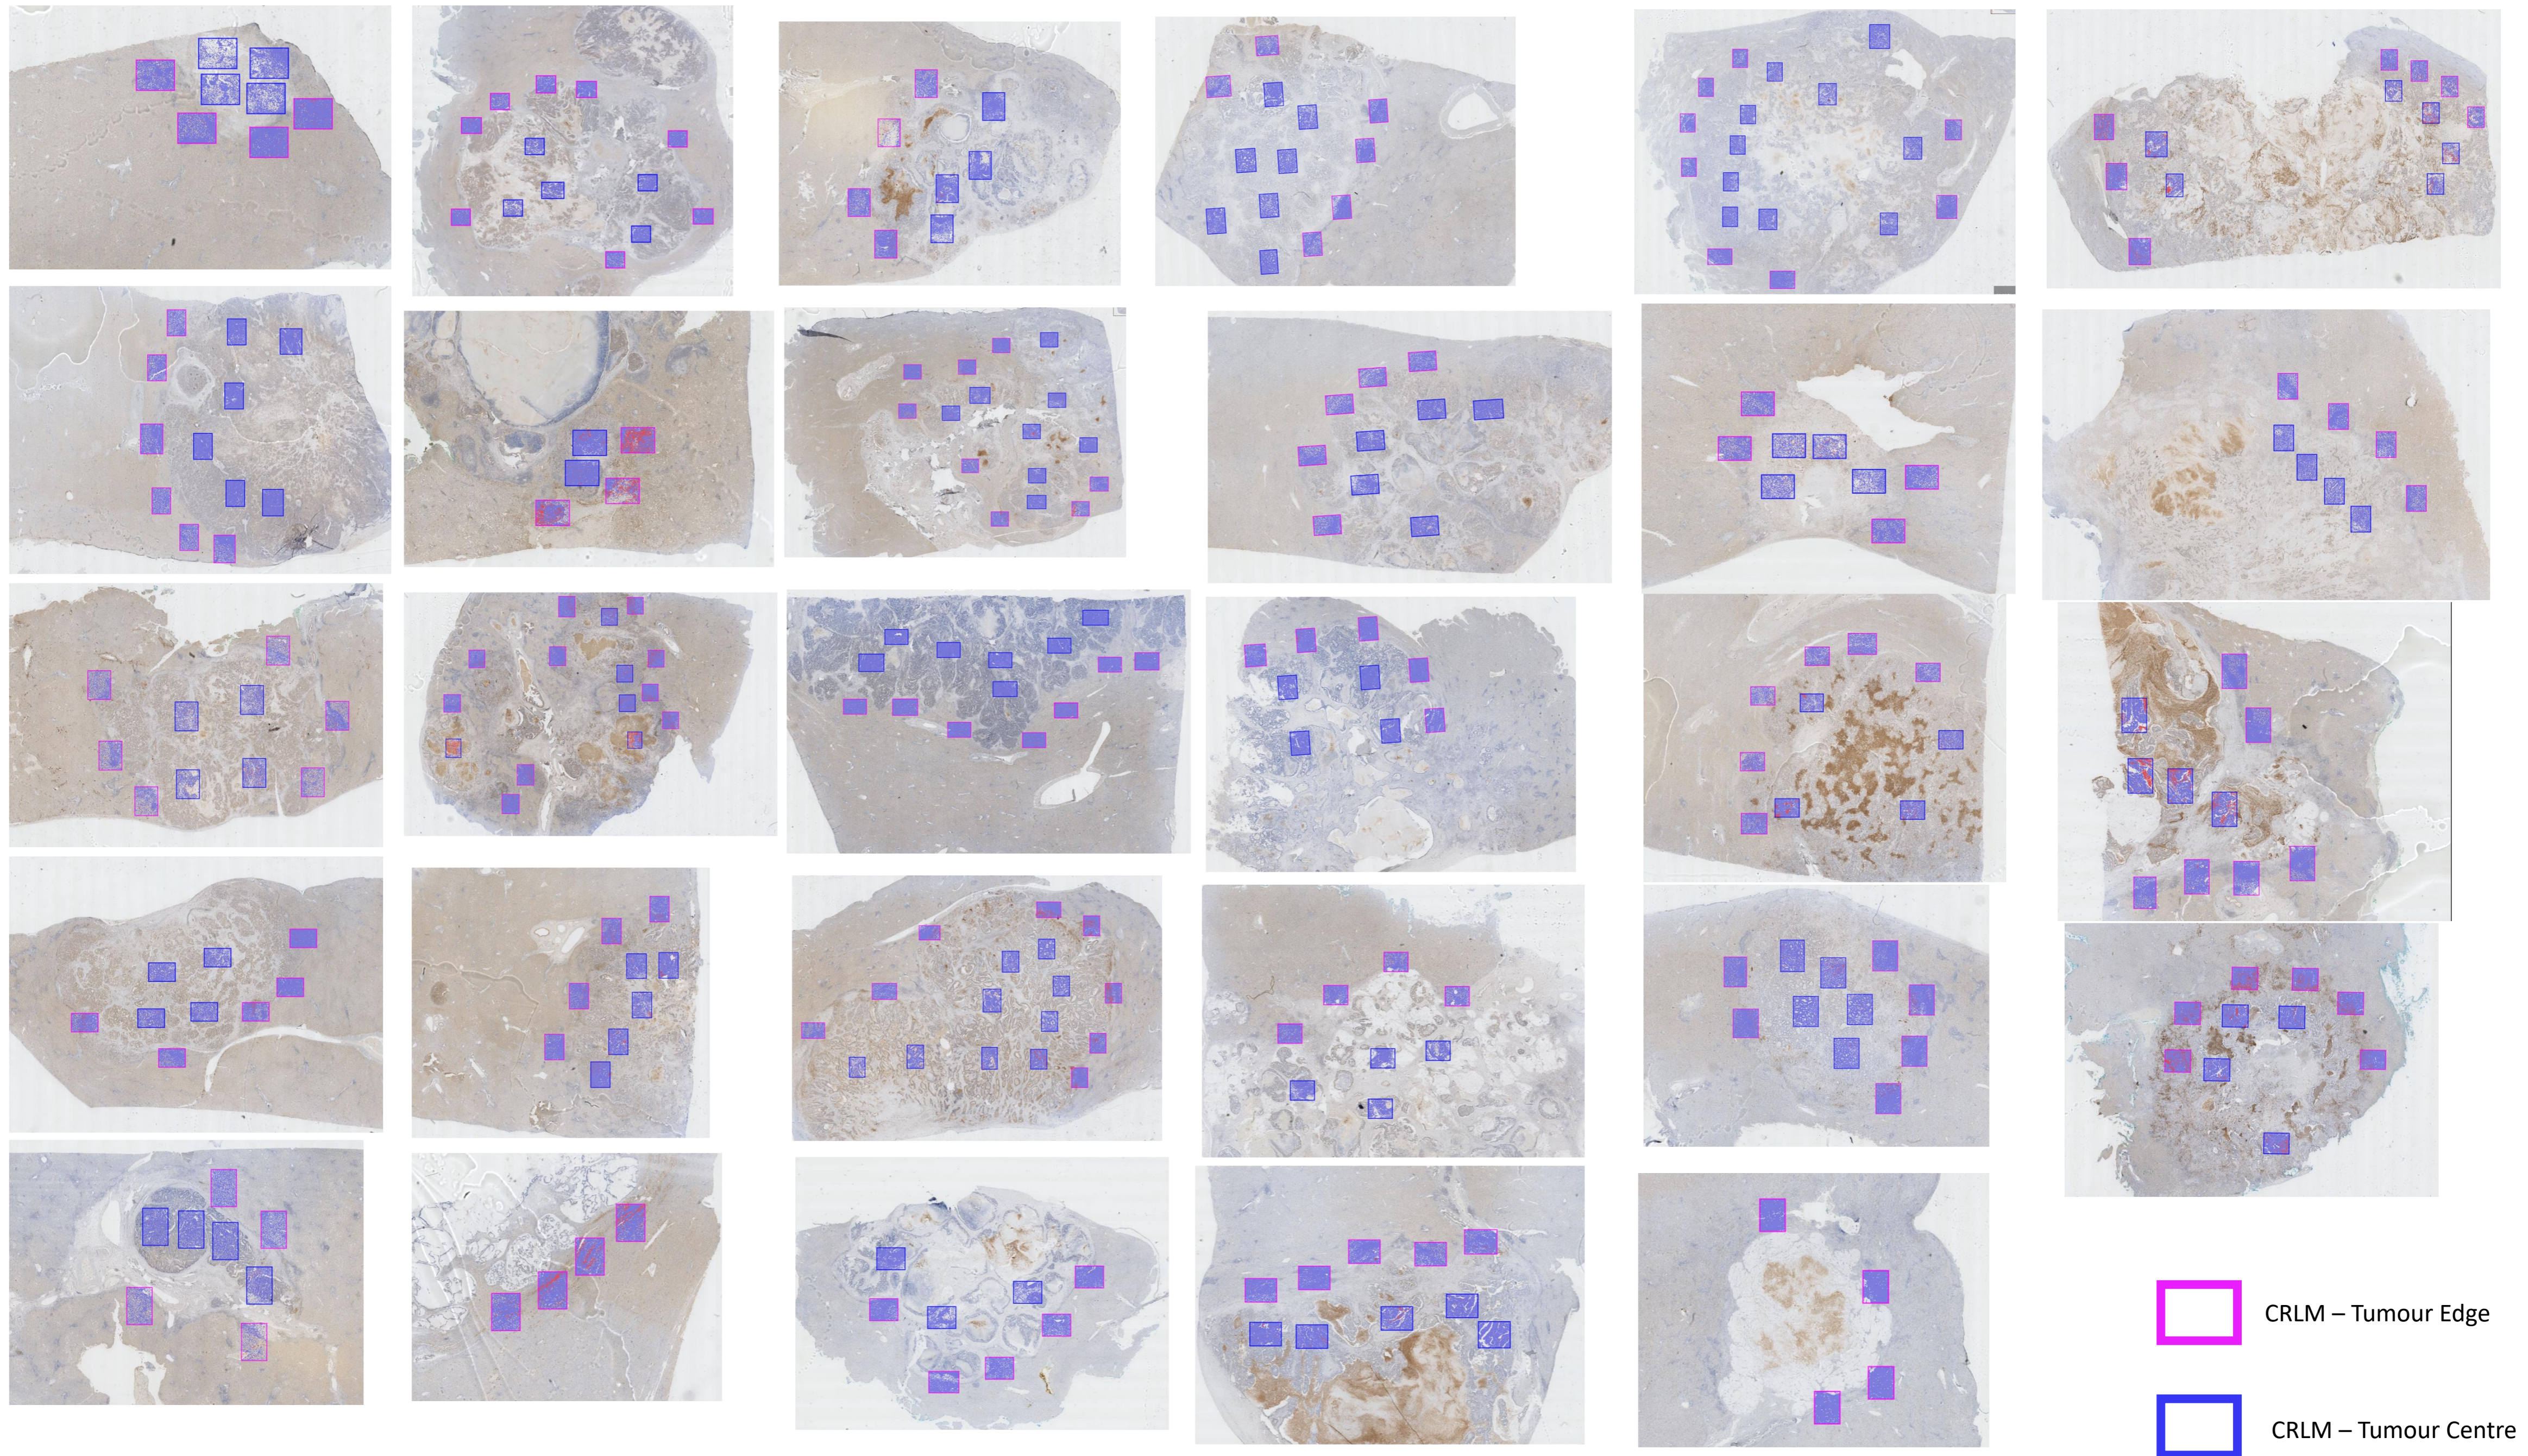

**Supplementary Figure 2g: Representative images of CD66b stained IHC of Colorectal Cancer Liver Metastases**  
CRC: Colorectal Cancer CRLM: Colorectal Liver Metastasis

# CD66b LIVER METASTASES

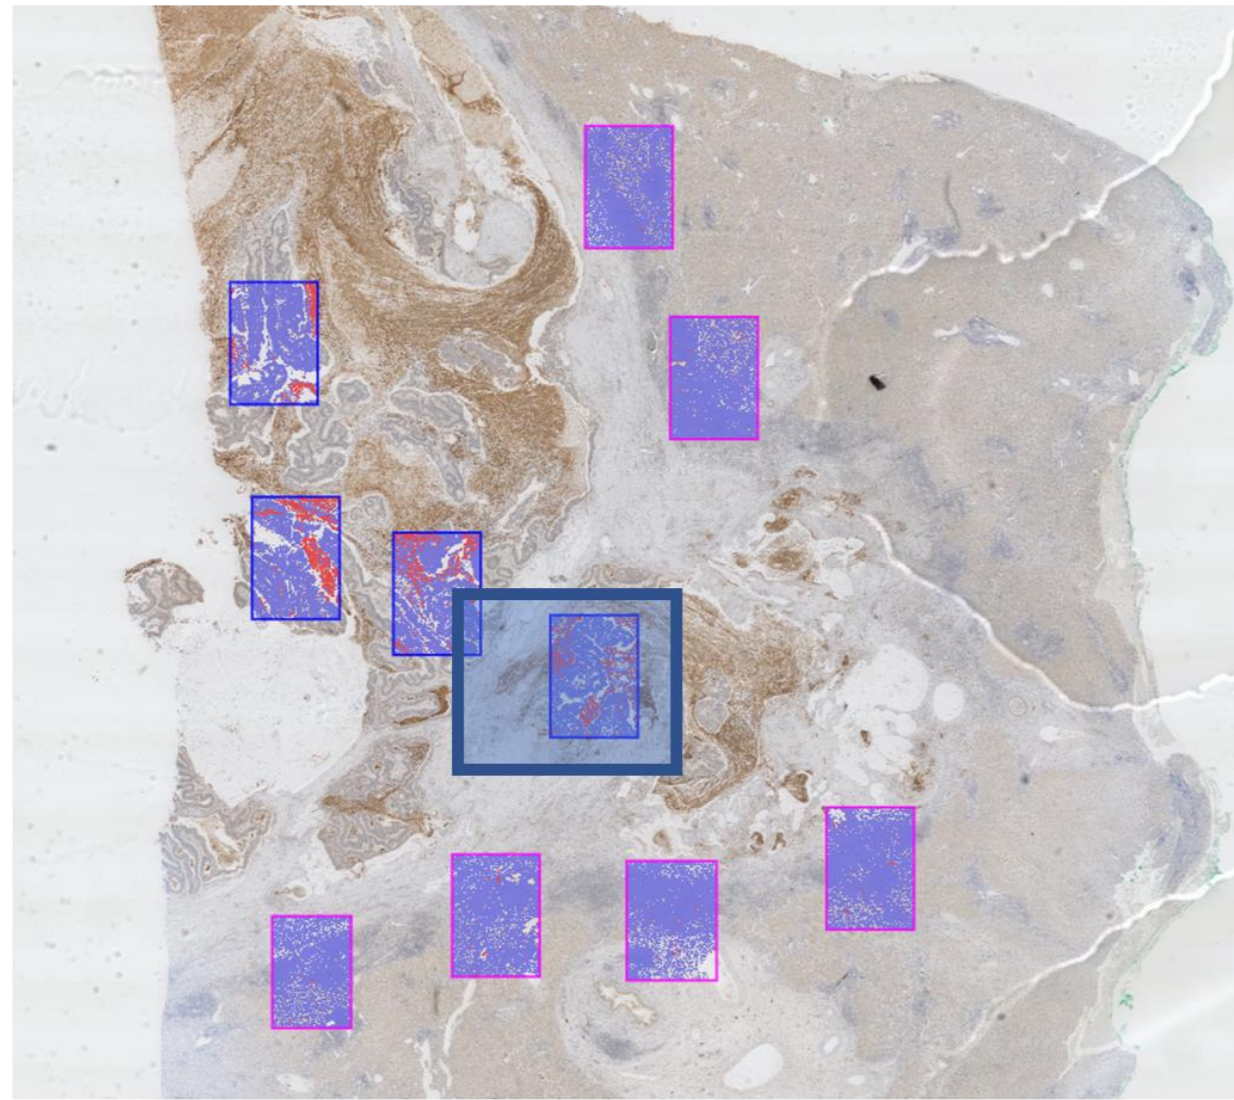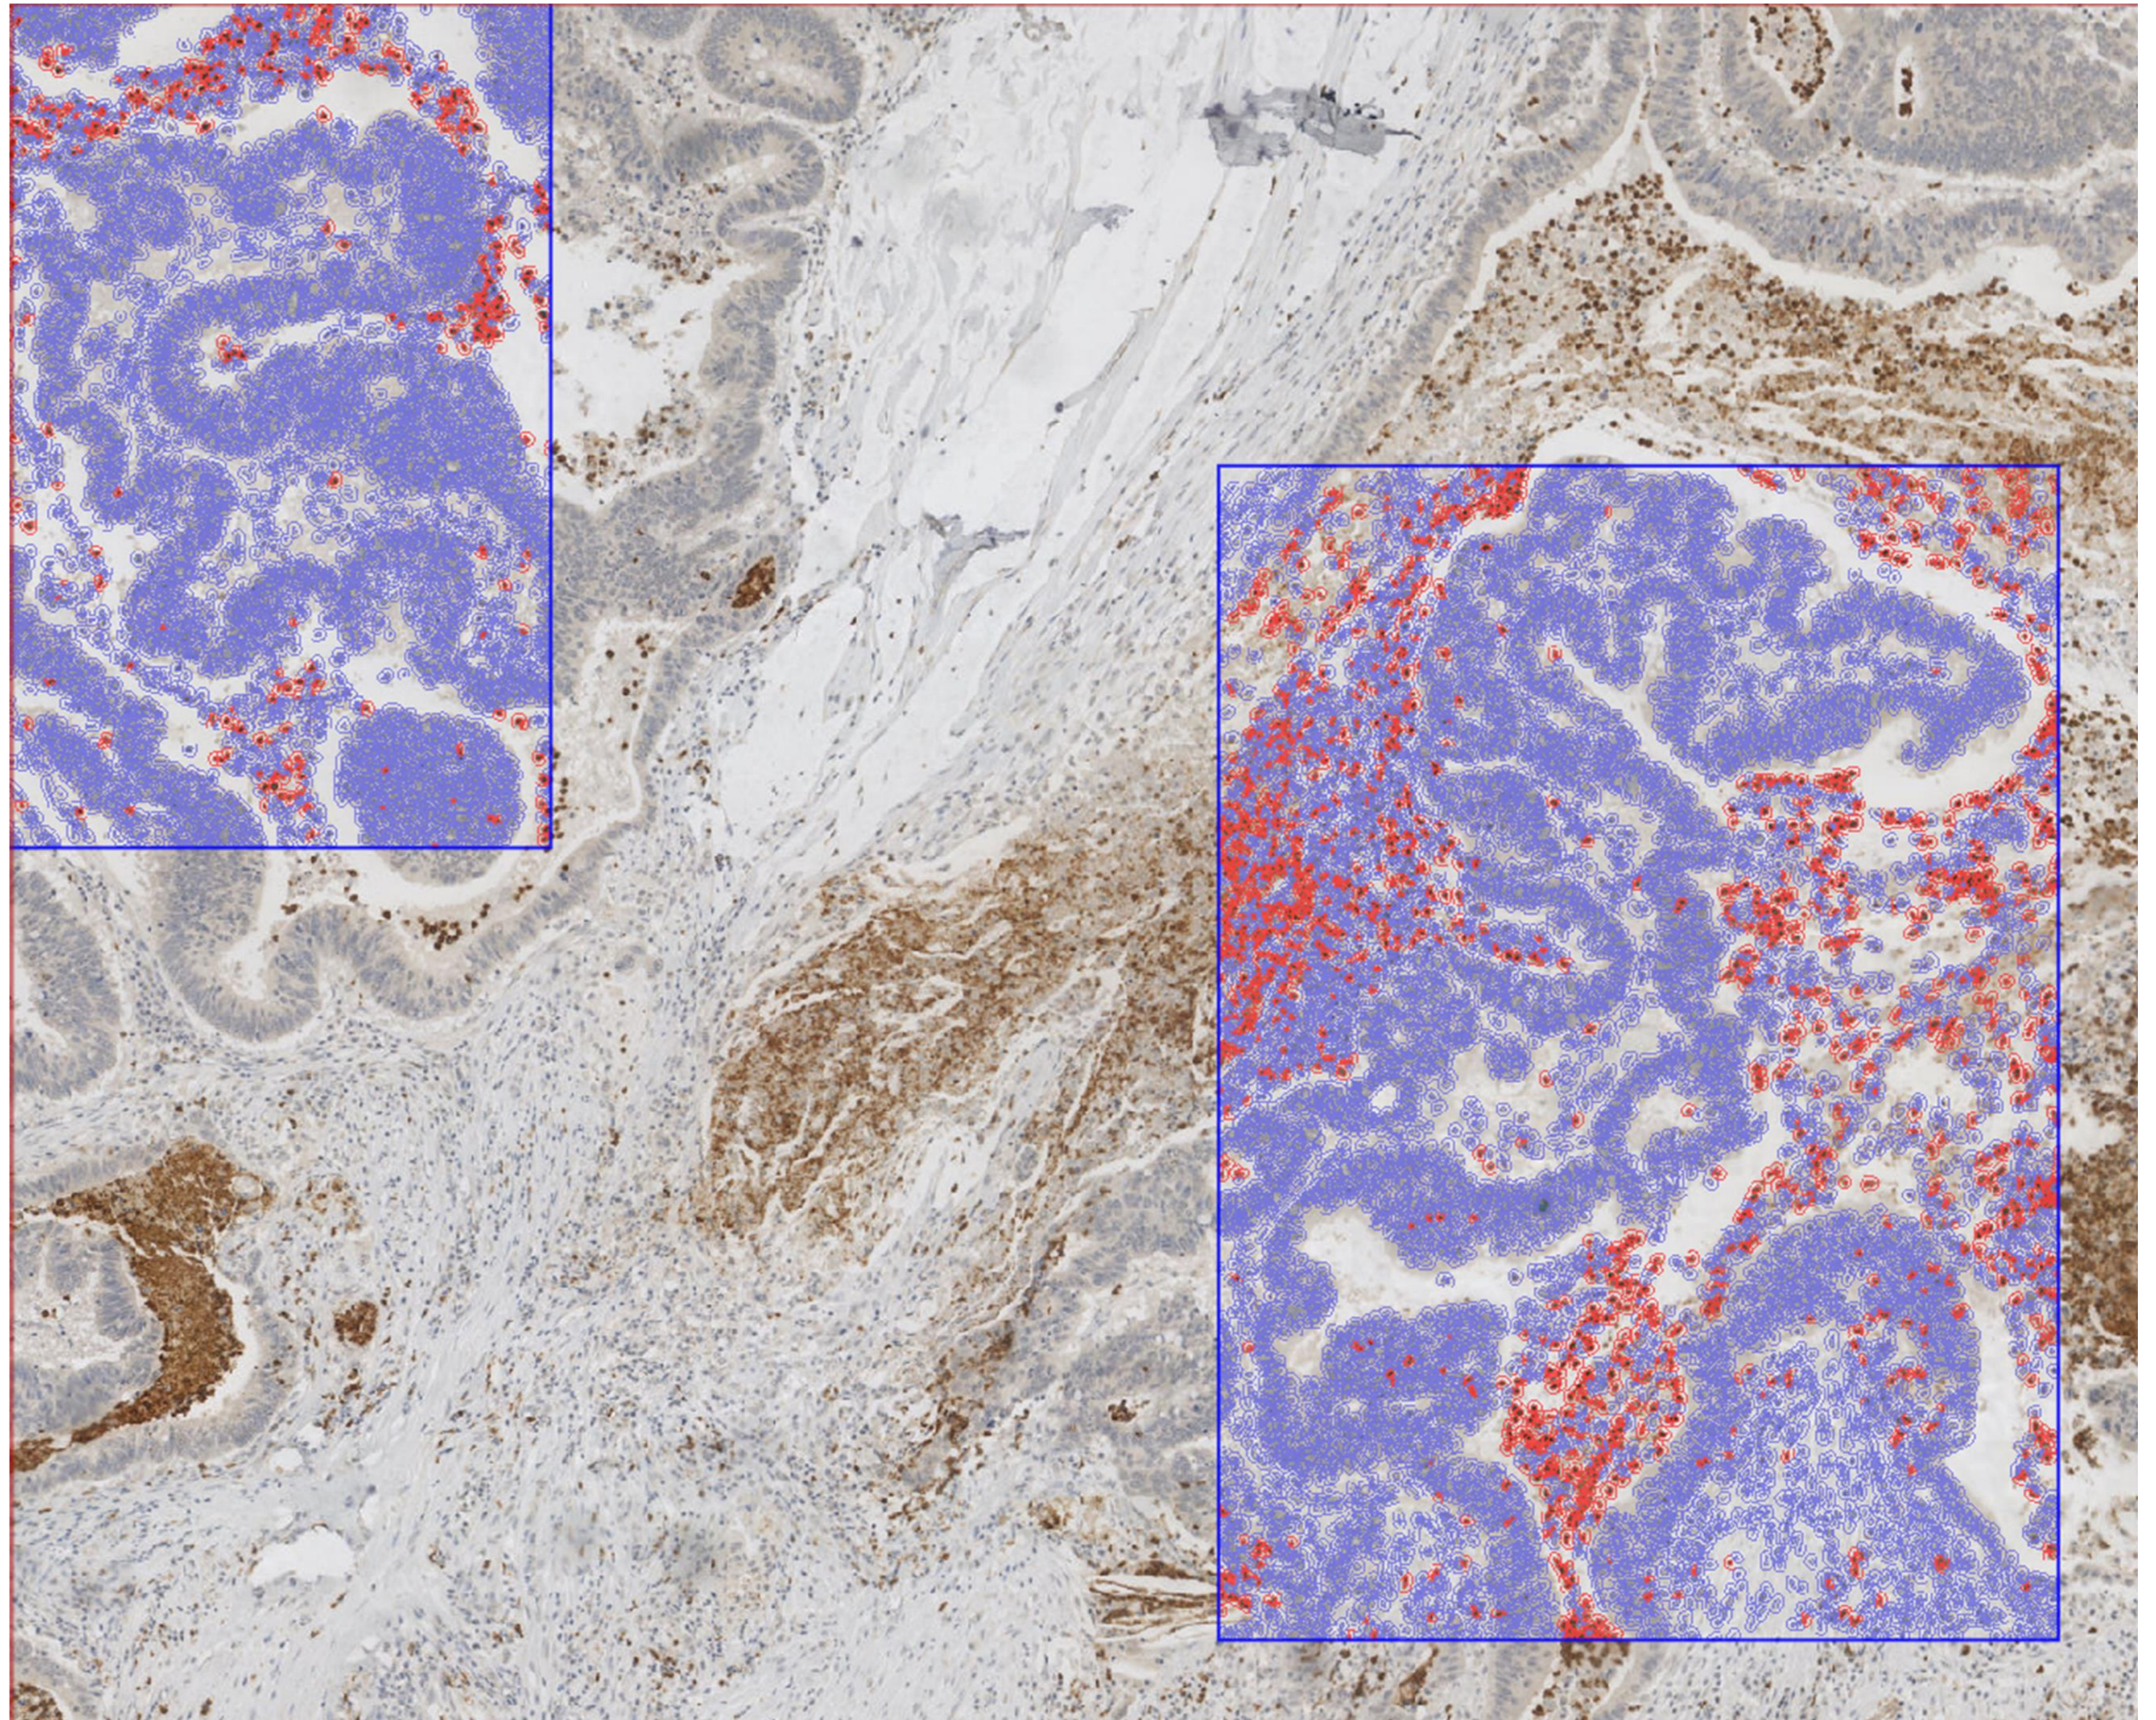

-  CRLM – Tumour Edge
-  CRLM – Tumour Centre

**Supplementary Figure 2h:**  
**Magnified representative images of CD66b stained IHC of Colorectal Cancer Liver Metastases**  
CRC: Colorectal Cancer CRLM: Colorectal Liver Metastasis

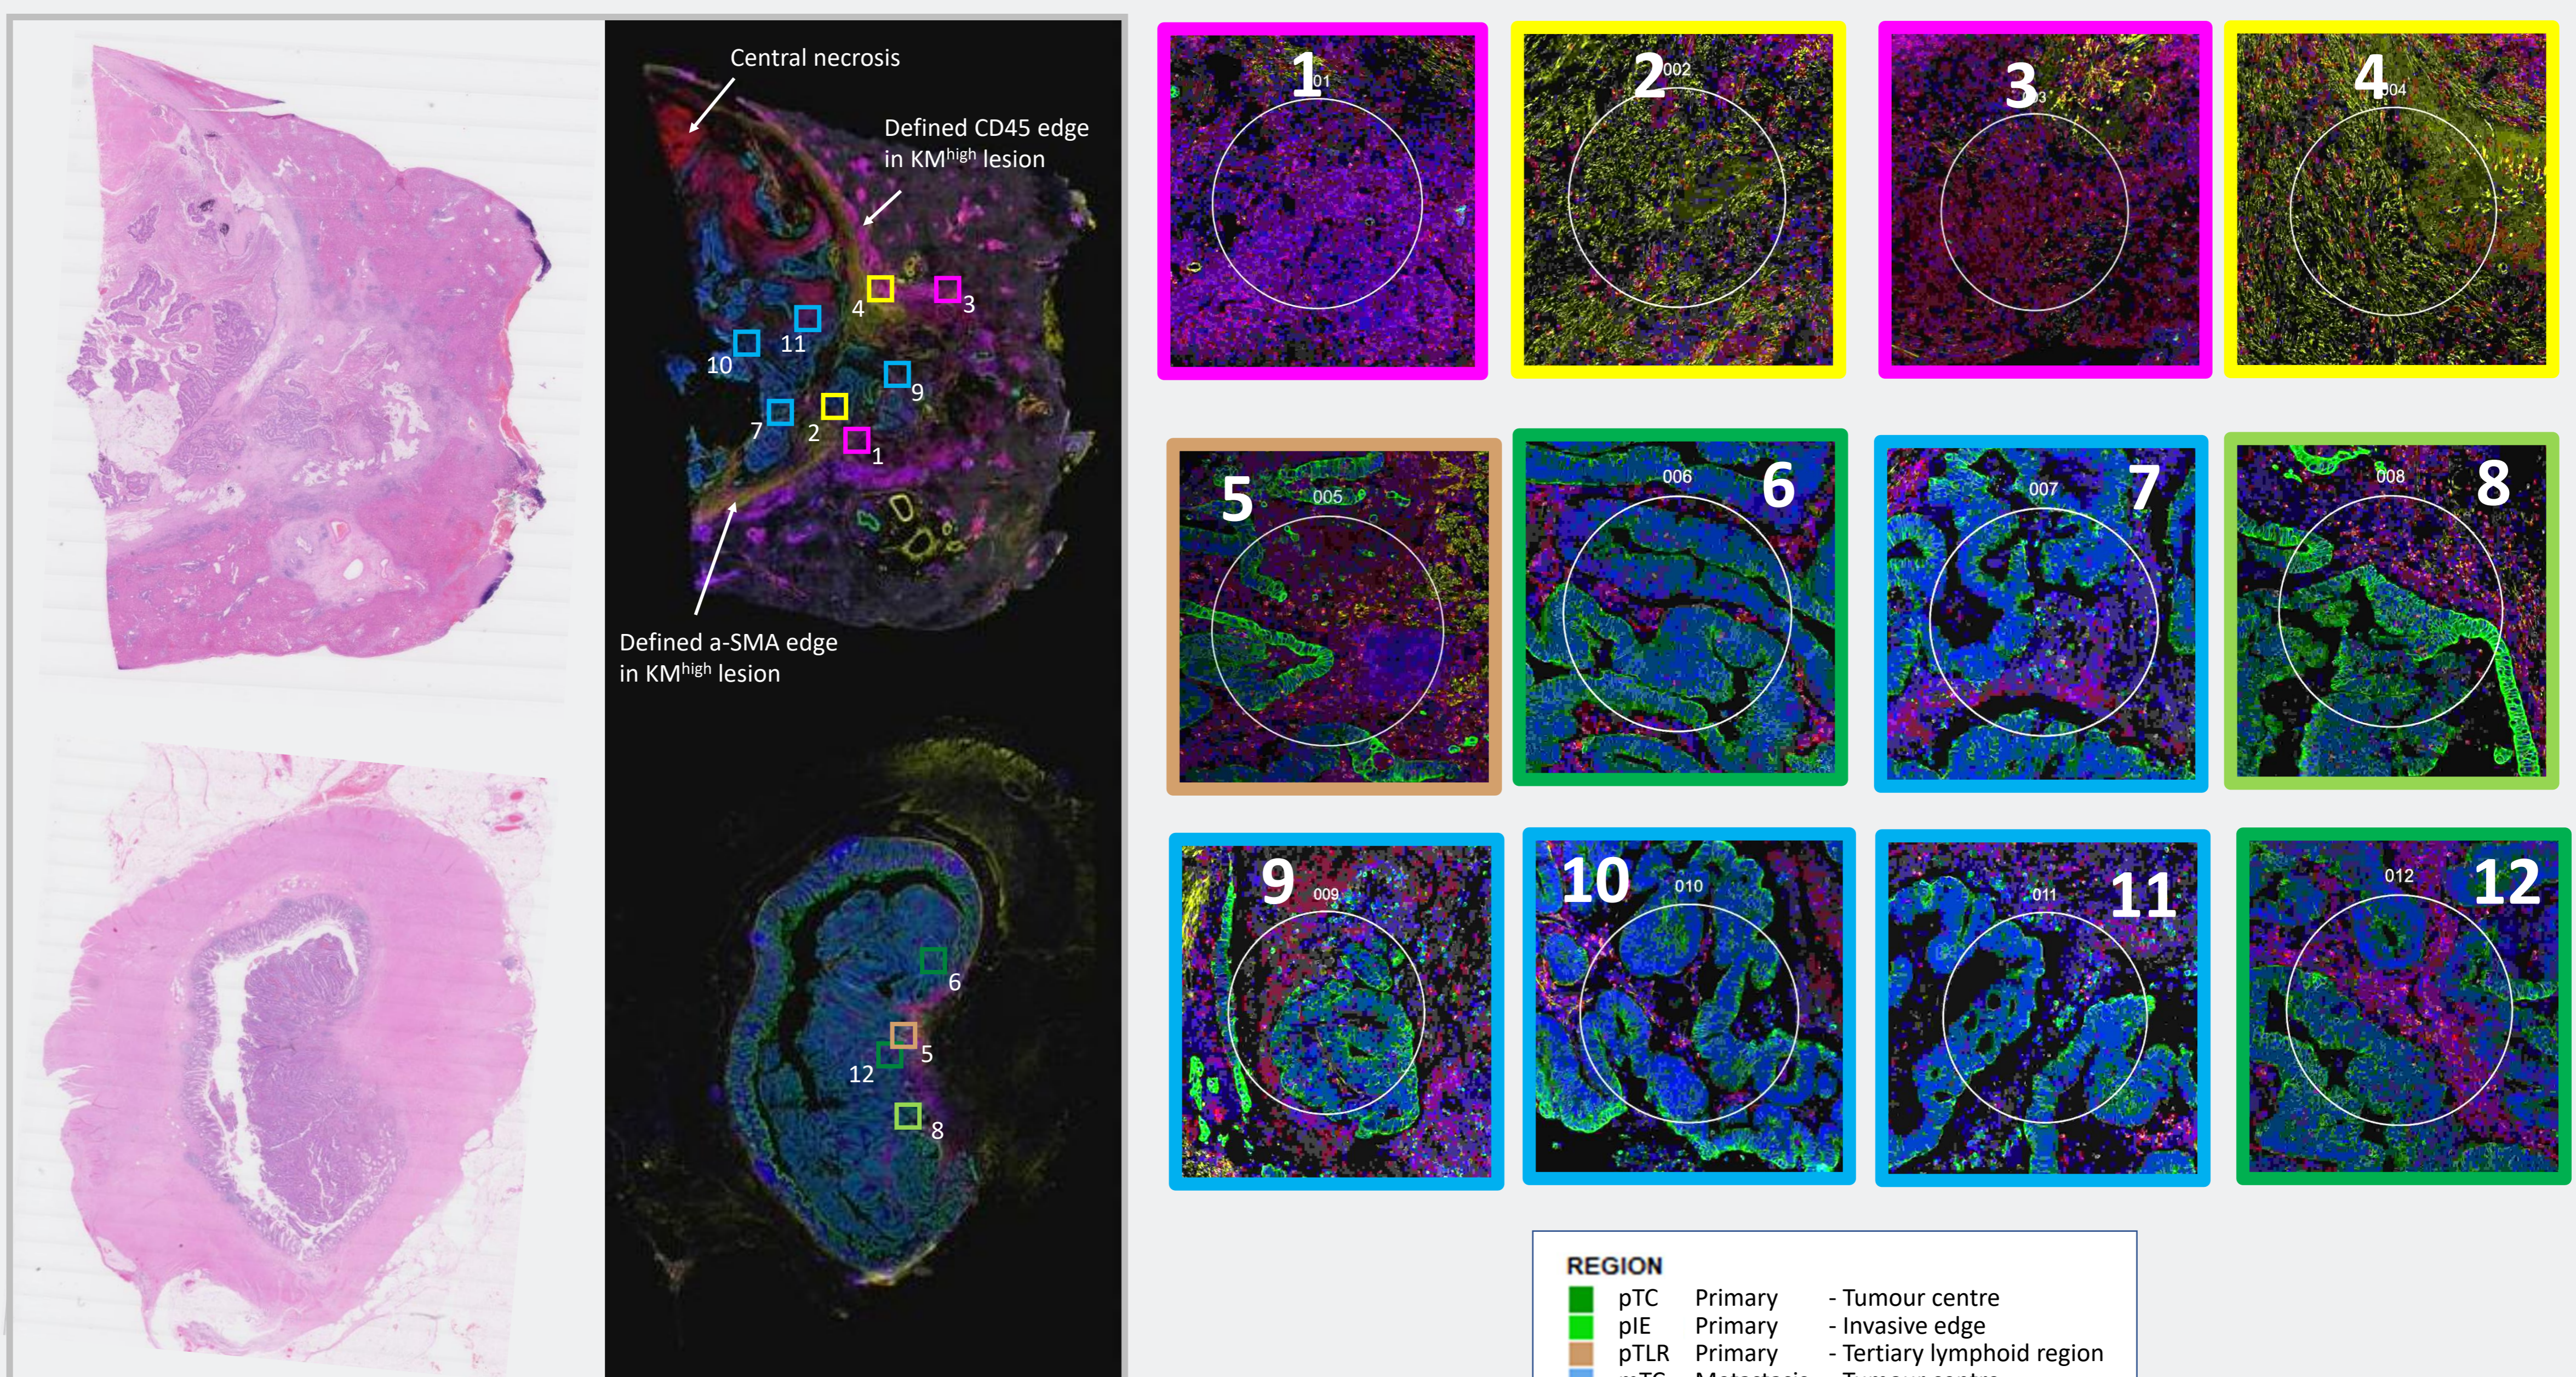

### Supplemental Figure 3 Patient A: $KM^{high}$ , KRAS wildtype type

Representative H+E and mIF stained sample with annotated regions colour coded alongside magnified image of regions, 4 primary and 8 metastases, from patient A from GeoMx experiment.

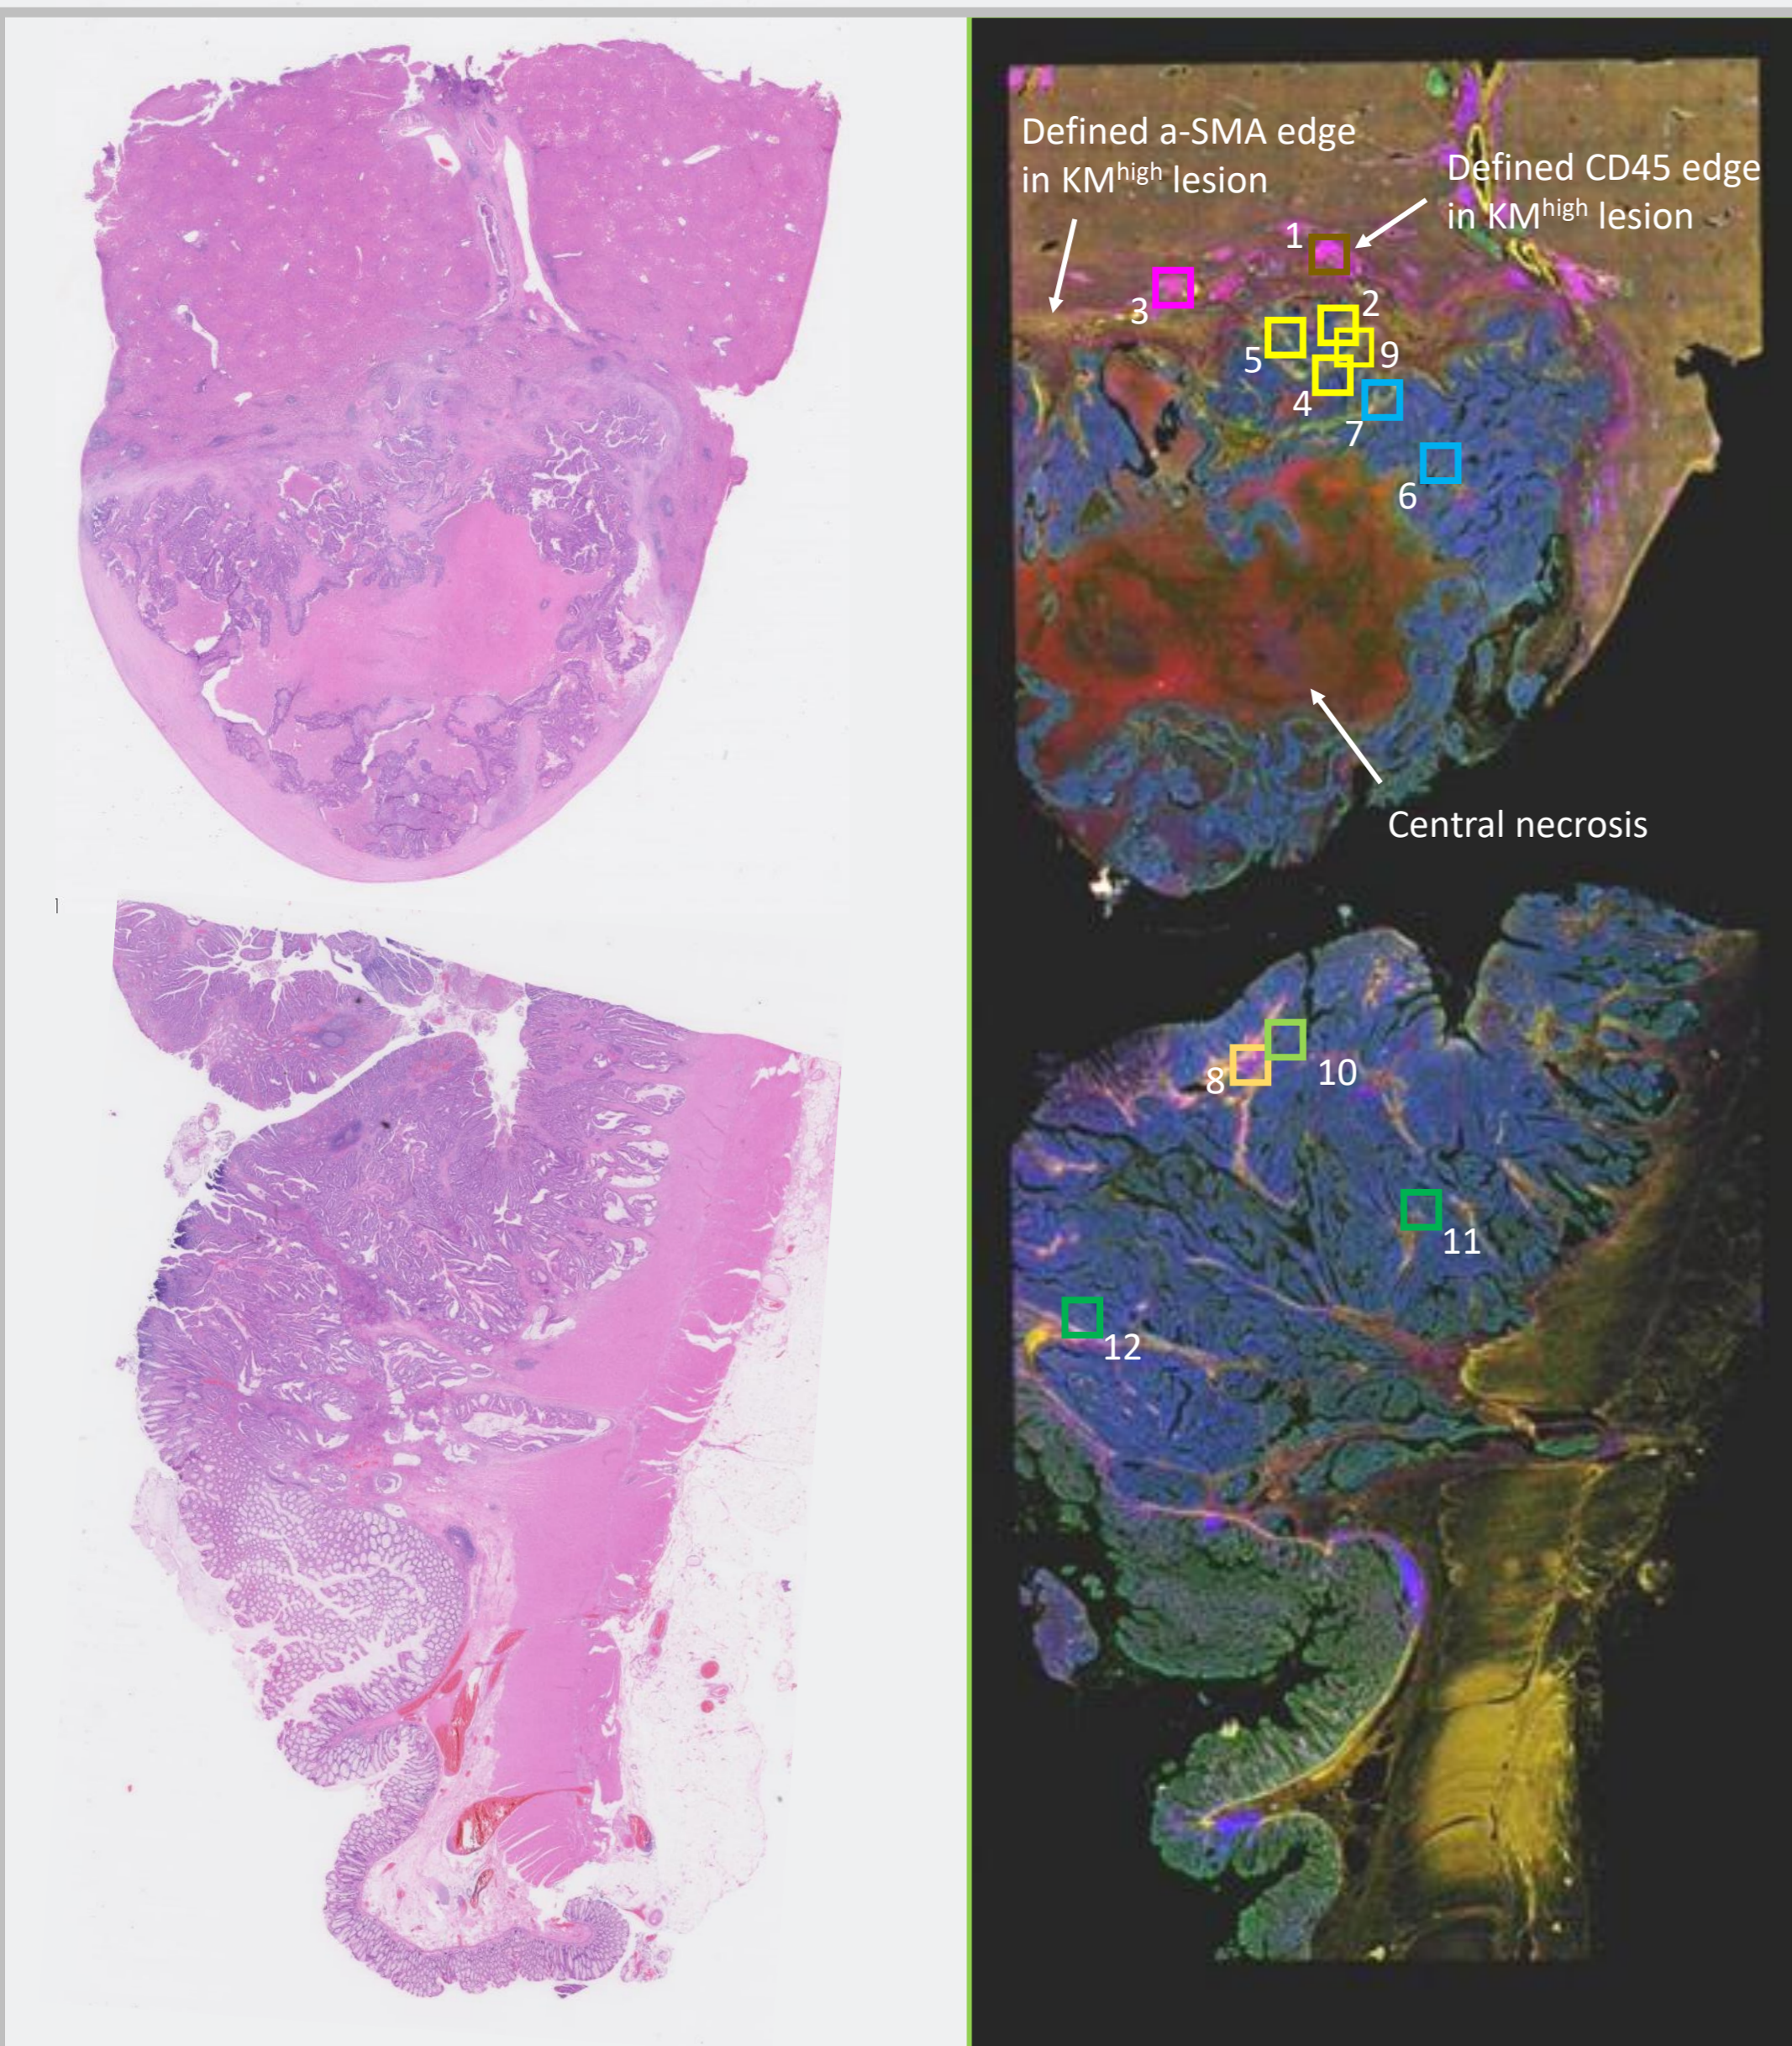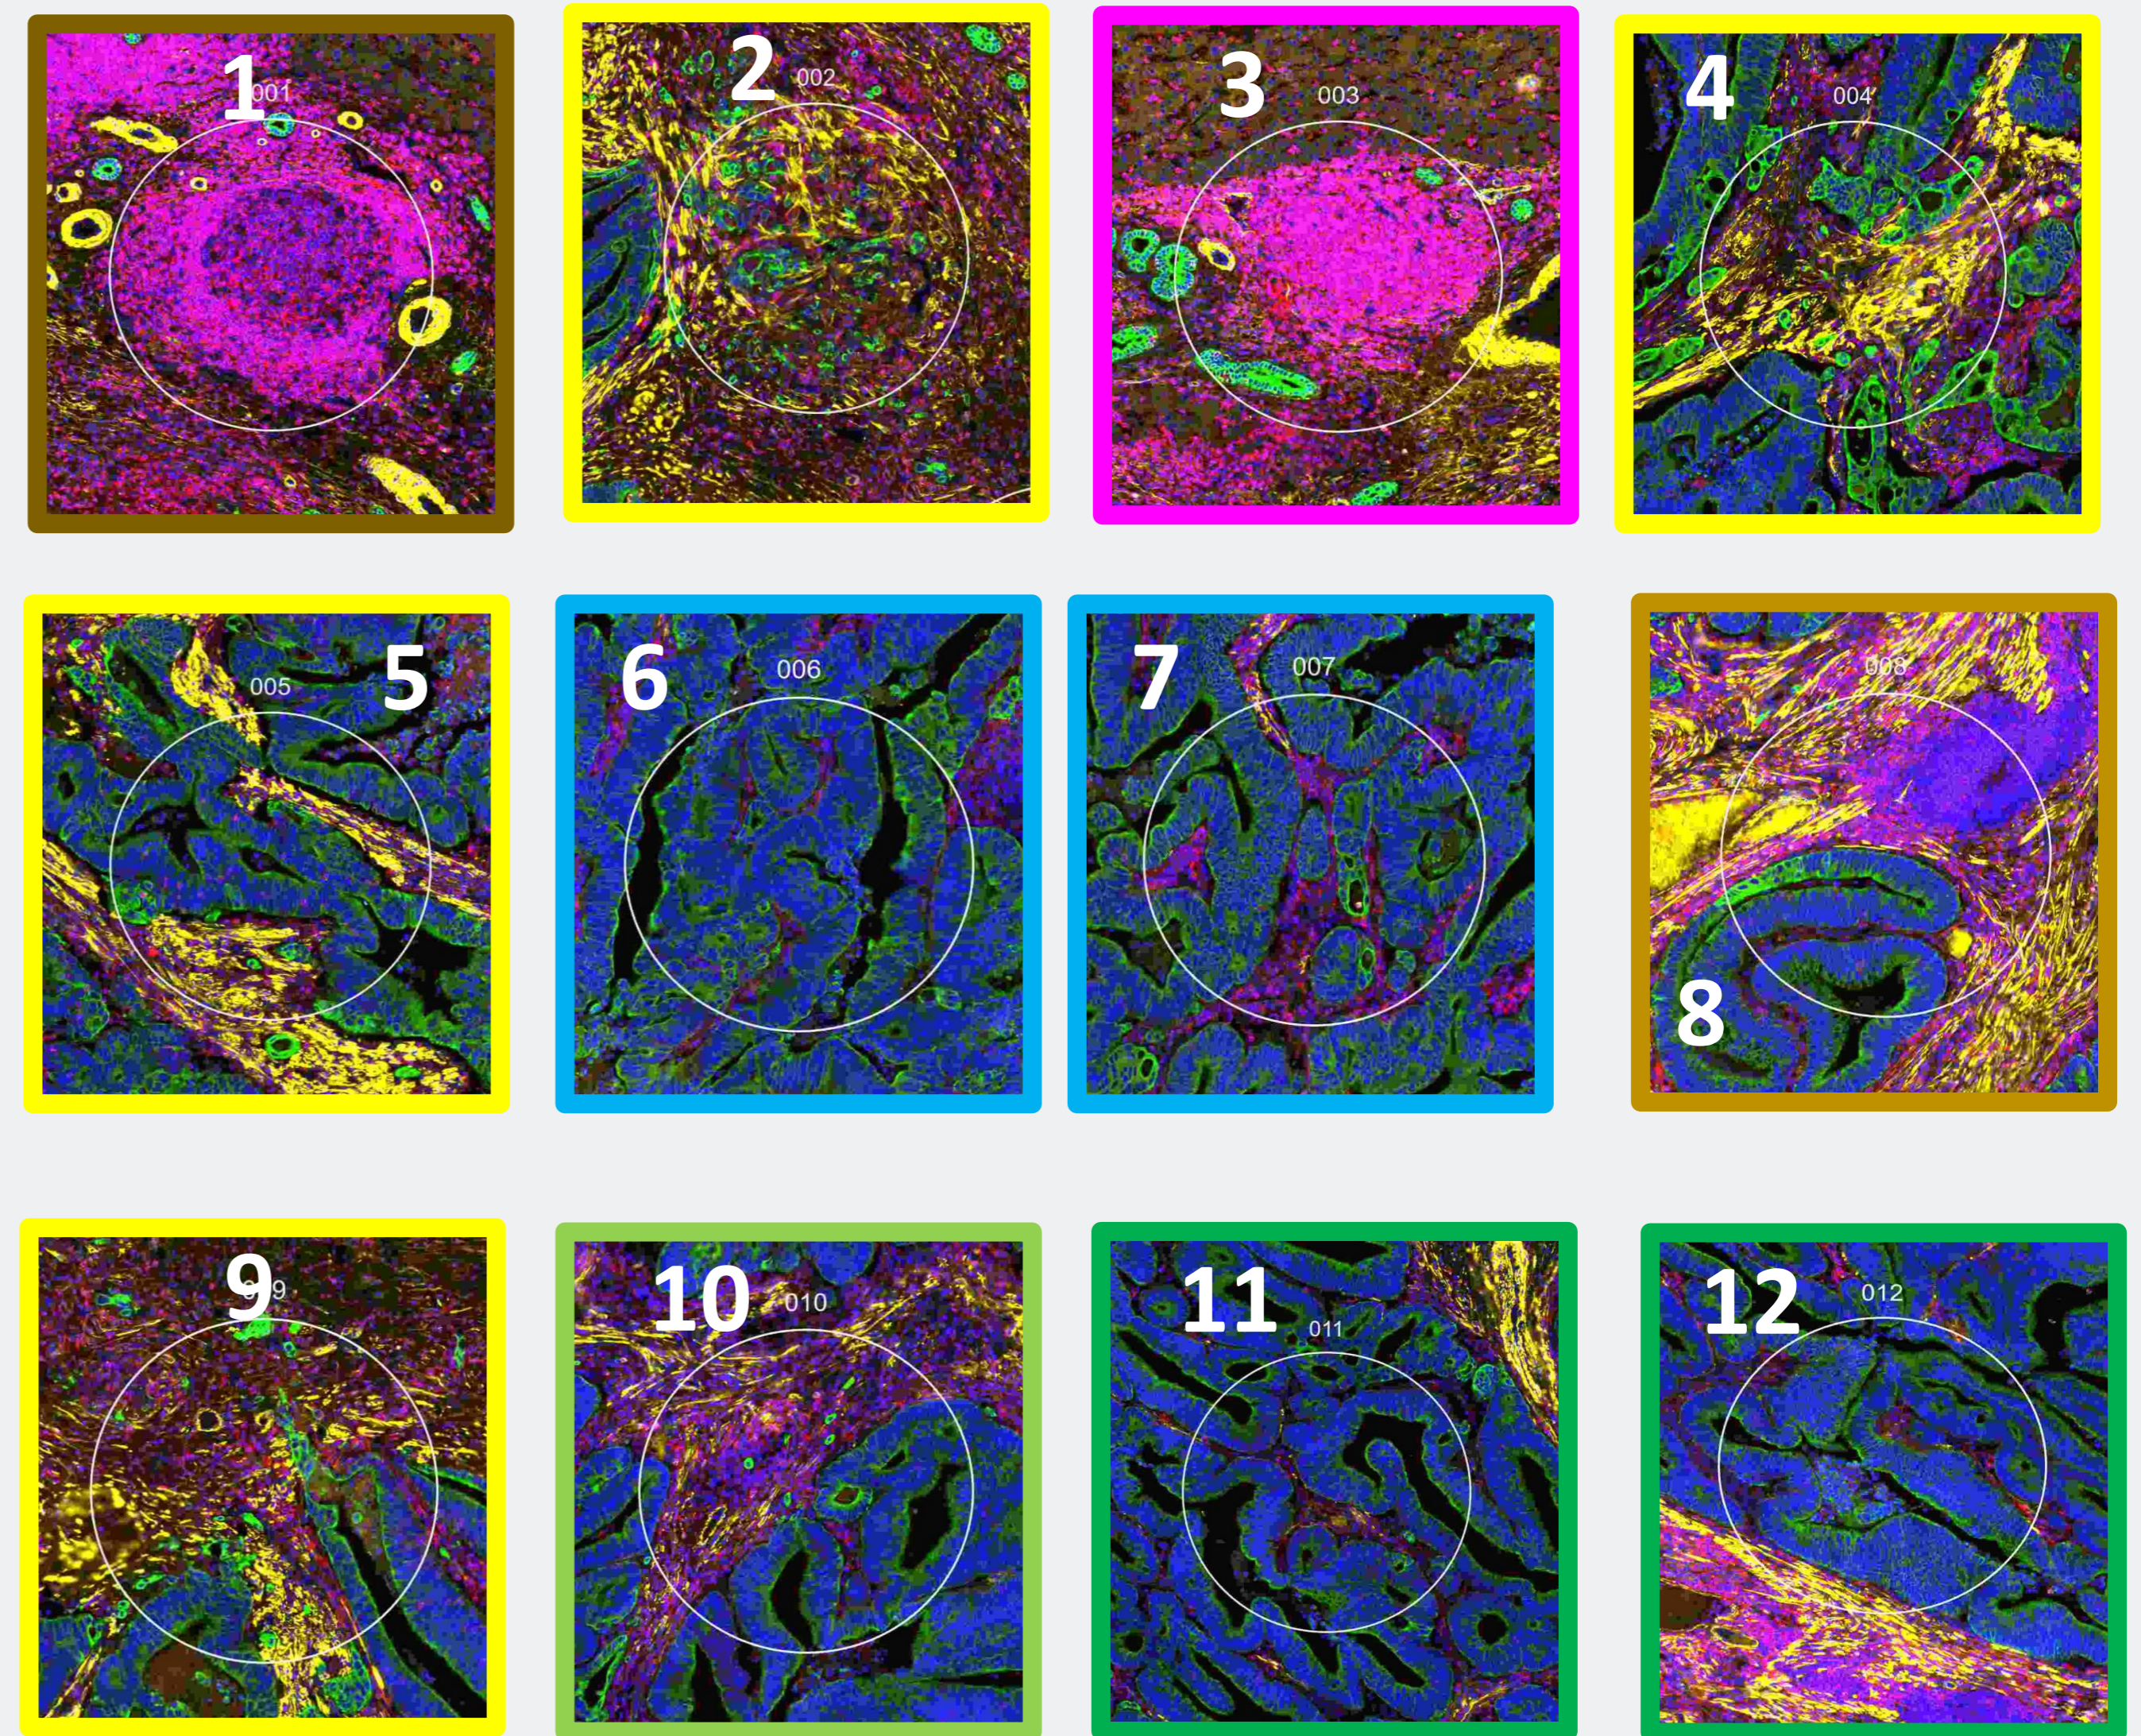

| REGION                                    |      |                                       |
|-------------------------------------------|------|---------------------------------------|
| <span style="color: green;">■</span>      | pTC  | Primary - Tumour centre               |
| <span style="color: lightgreen;">■</span> | pIE  | Primary - Invasive edge               |
| <span style="color: brown;">■</span>      | pTLR | Primary - Tertiary lymphoid region    |
| <span style="color: blue;">■</span>       | mTC  | Metastasis - Tumour centre            |
| <span style="color: magenta;">■</span>    | mIE  | Metastasis - Invasive edge (immune)   |
| <span style="color: yellow;">■</span>     | mSE  | Metastasis - Invasive edge (stromal)  |
| <span style="color: darkred;">■</span>    | mTLR | Metastasis - Tertiary lymphoid region |

## Supplemental Figure 4 Patient B: $KM^{high}$ immune, KRAS mutation

Representative H+E and mIF stained sample with annotated regions colour coded alongside magnified image of regions, 4 primary and 8 metastases, from patient B from GeoMx experiment

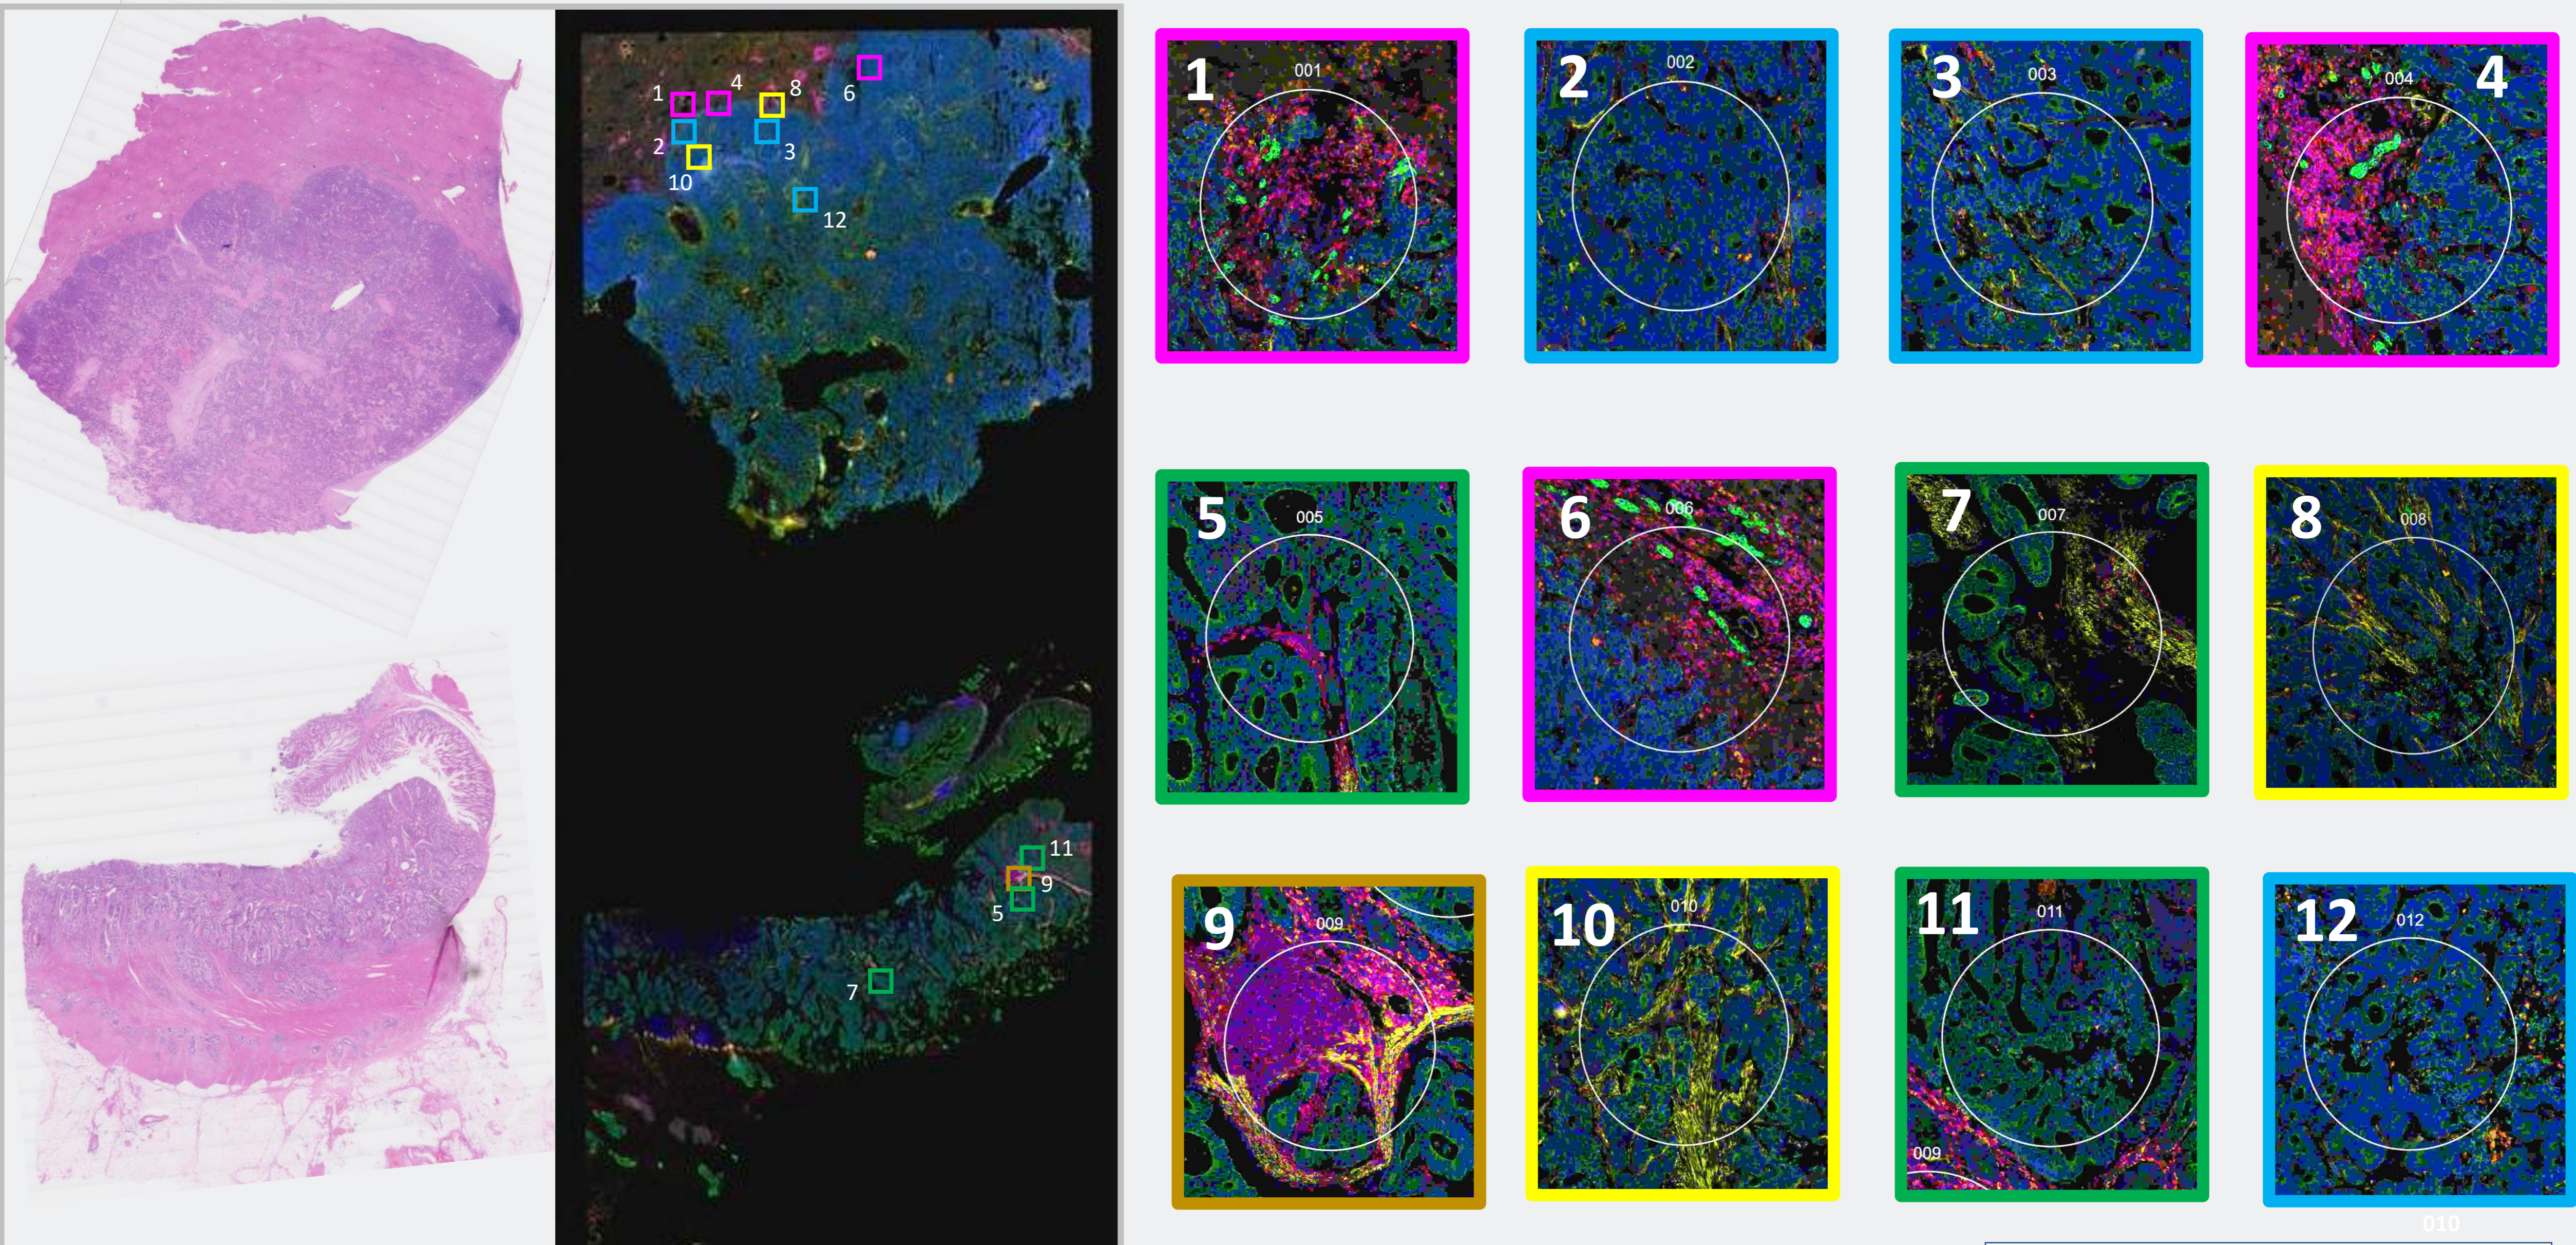

| REGION |            |                            |
|--------|------------|----------------------------|
| ■ pTC  | Primary    | - Tumour centre            |
| ■ pIE  | Primary    | - Invasive edge            |
| ■ pTLR | Primary    | - Tertiary lymphoid region |
| ■ mTC  | Metastasis | - Tumour centre            |
| ■ mIE  | Metastasis | - Invasive edge (immune)   |
| ■ mSE  | Metastasis | - Invasive edge (stromal)  |
| ■ mTLR | Metastasis | - Tertiary lymphoid region |

## Supplemental Figure 5 Patient C: $KM^{low}$ immune, KRAS mutation

Representative H+E and mIF stained sample with annotated regions colour coded alongside magnified image of regions, 4 primary and 8 metastases, from patient C from GeoMx experiment

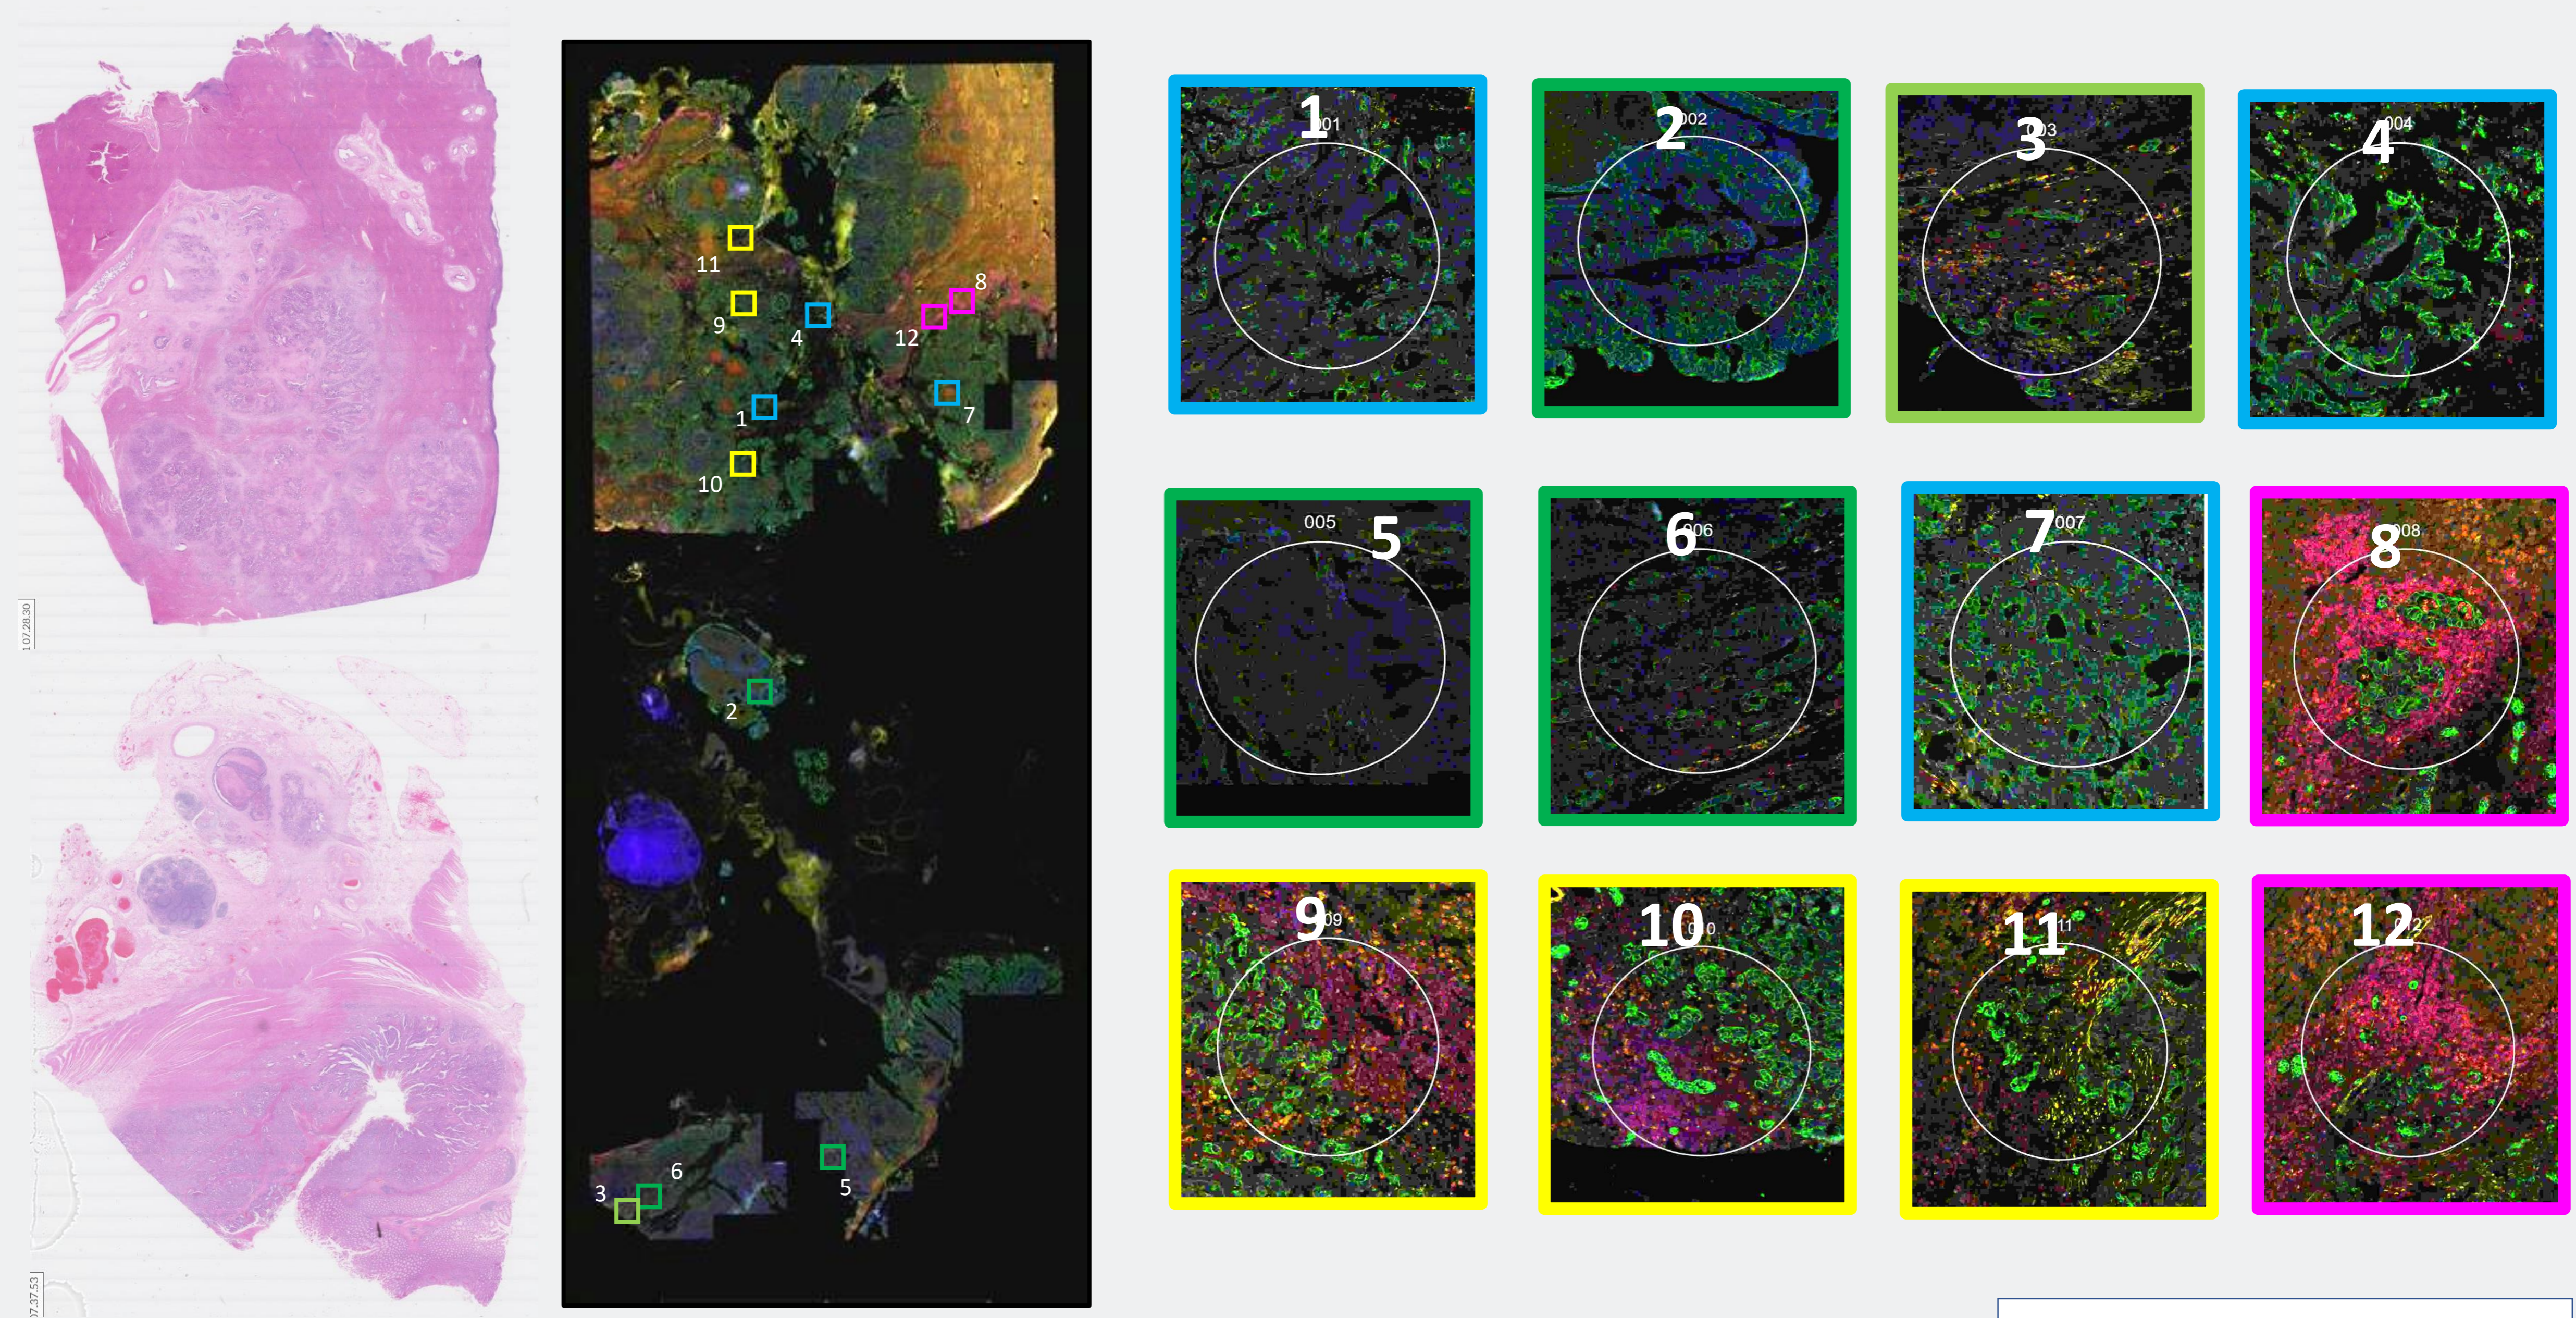

**Supplemental Figure 6 Patient D:  $KM^{low}$  immune, KRAS wildtype, BRAF mutant**

Representative H+E and mIF stained sample with annotated regions colour coded alongside magnified image of regions, 4 primary and 8 metastases, from patient D from GeoMx experiment

| REGION |      |                                       |
|--------|------|---------------------------------------|
| ■      | pTC  | Primary - Tumour centre               |
| ■      | pIE  | Primary - Invasive edge               |
| ■      | pTLR | Primary - Tertiary lymphoid region    |
| ■      | mTC  | Metastasis - Tumour centre            |
| ■      | mIE  | Metastasis - Invasive edge (immune)   |
| ■      | mSE  | Metastasis - Invasive edge (stromal)  |
| ■      | mTLR | Metastasis - Tertiary lymphoid region |

**A**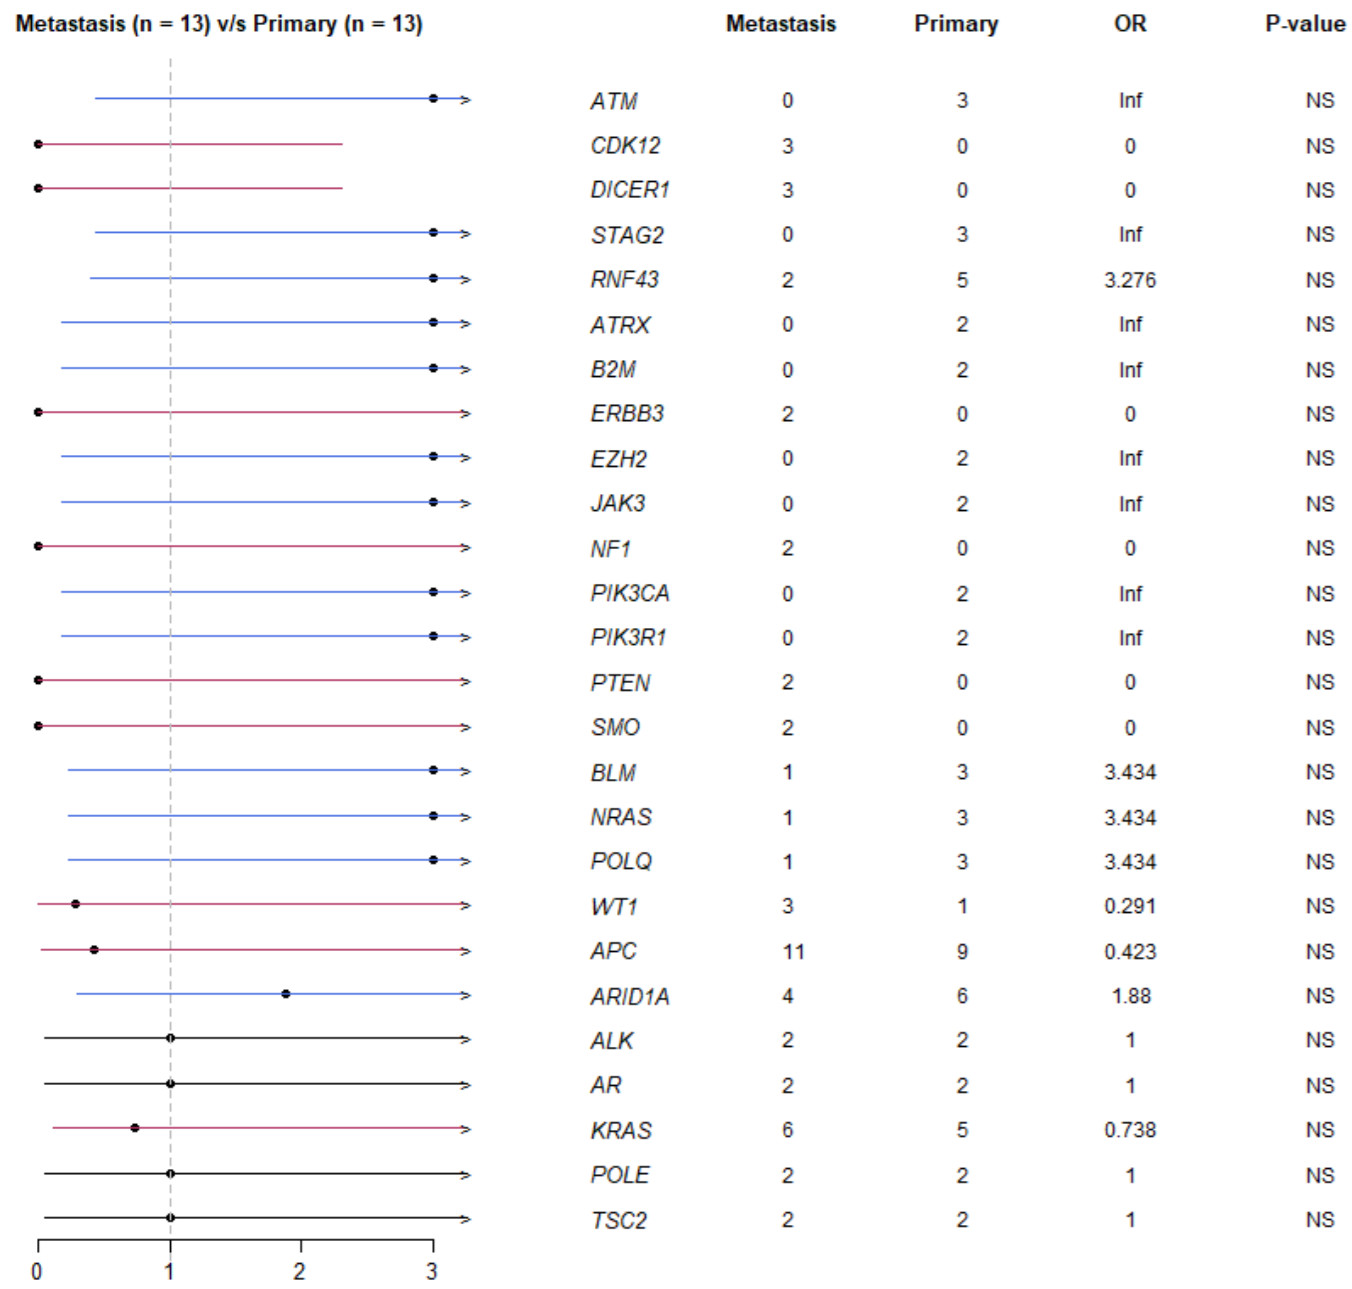

Odds ratio with 95% CI  
(1 = no effect, < 1 Metastasis has more mutants)

**B**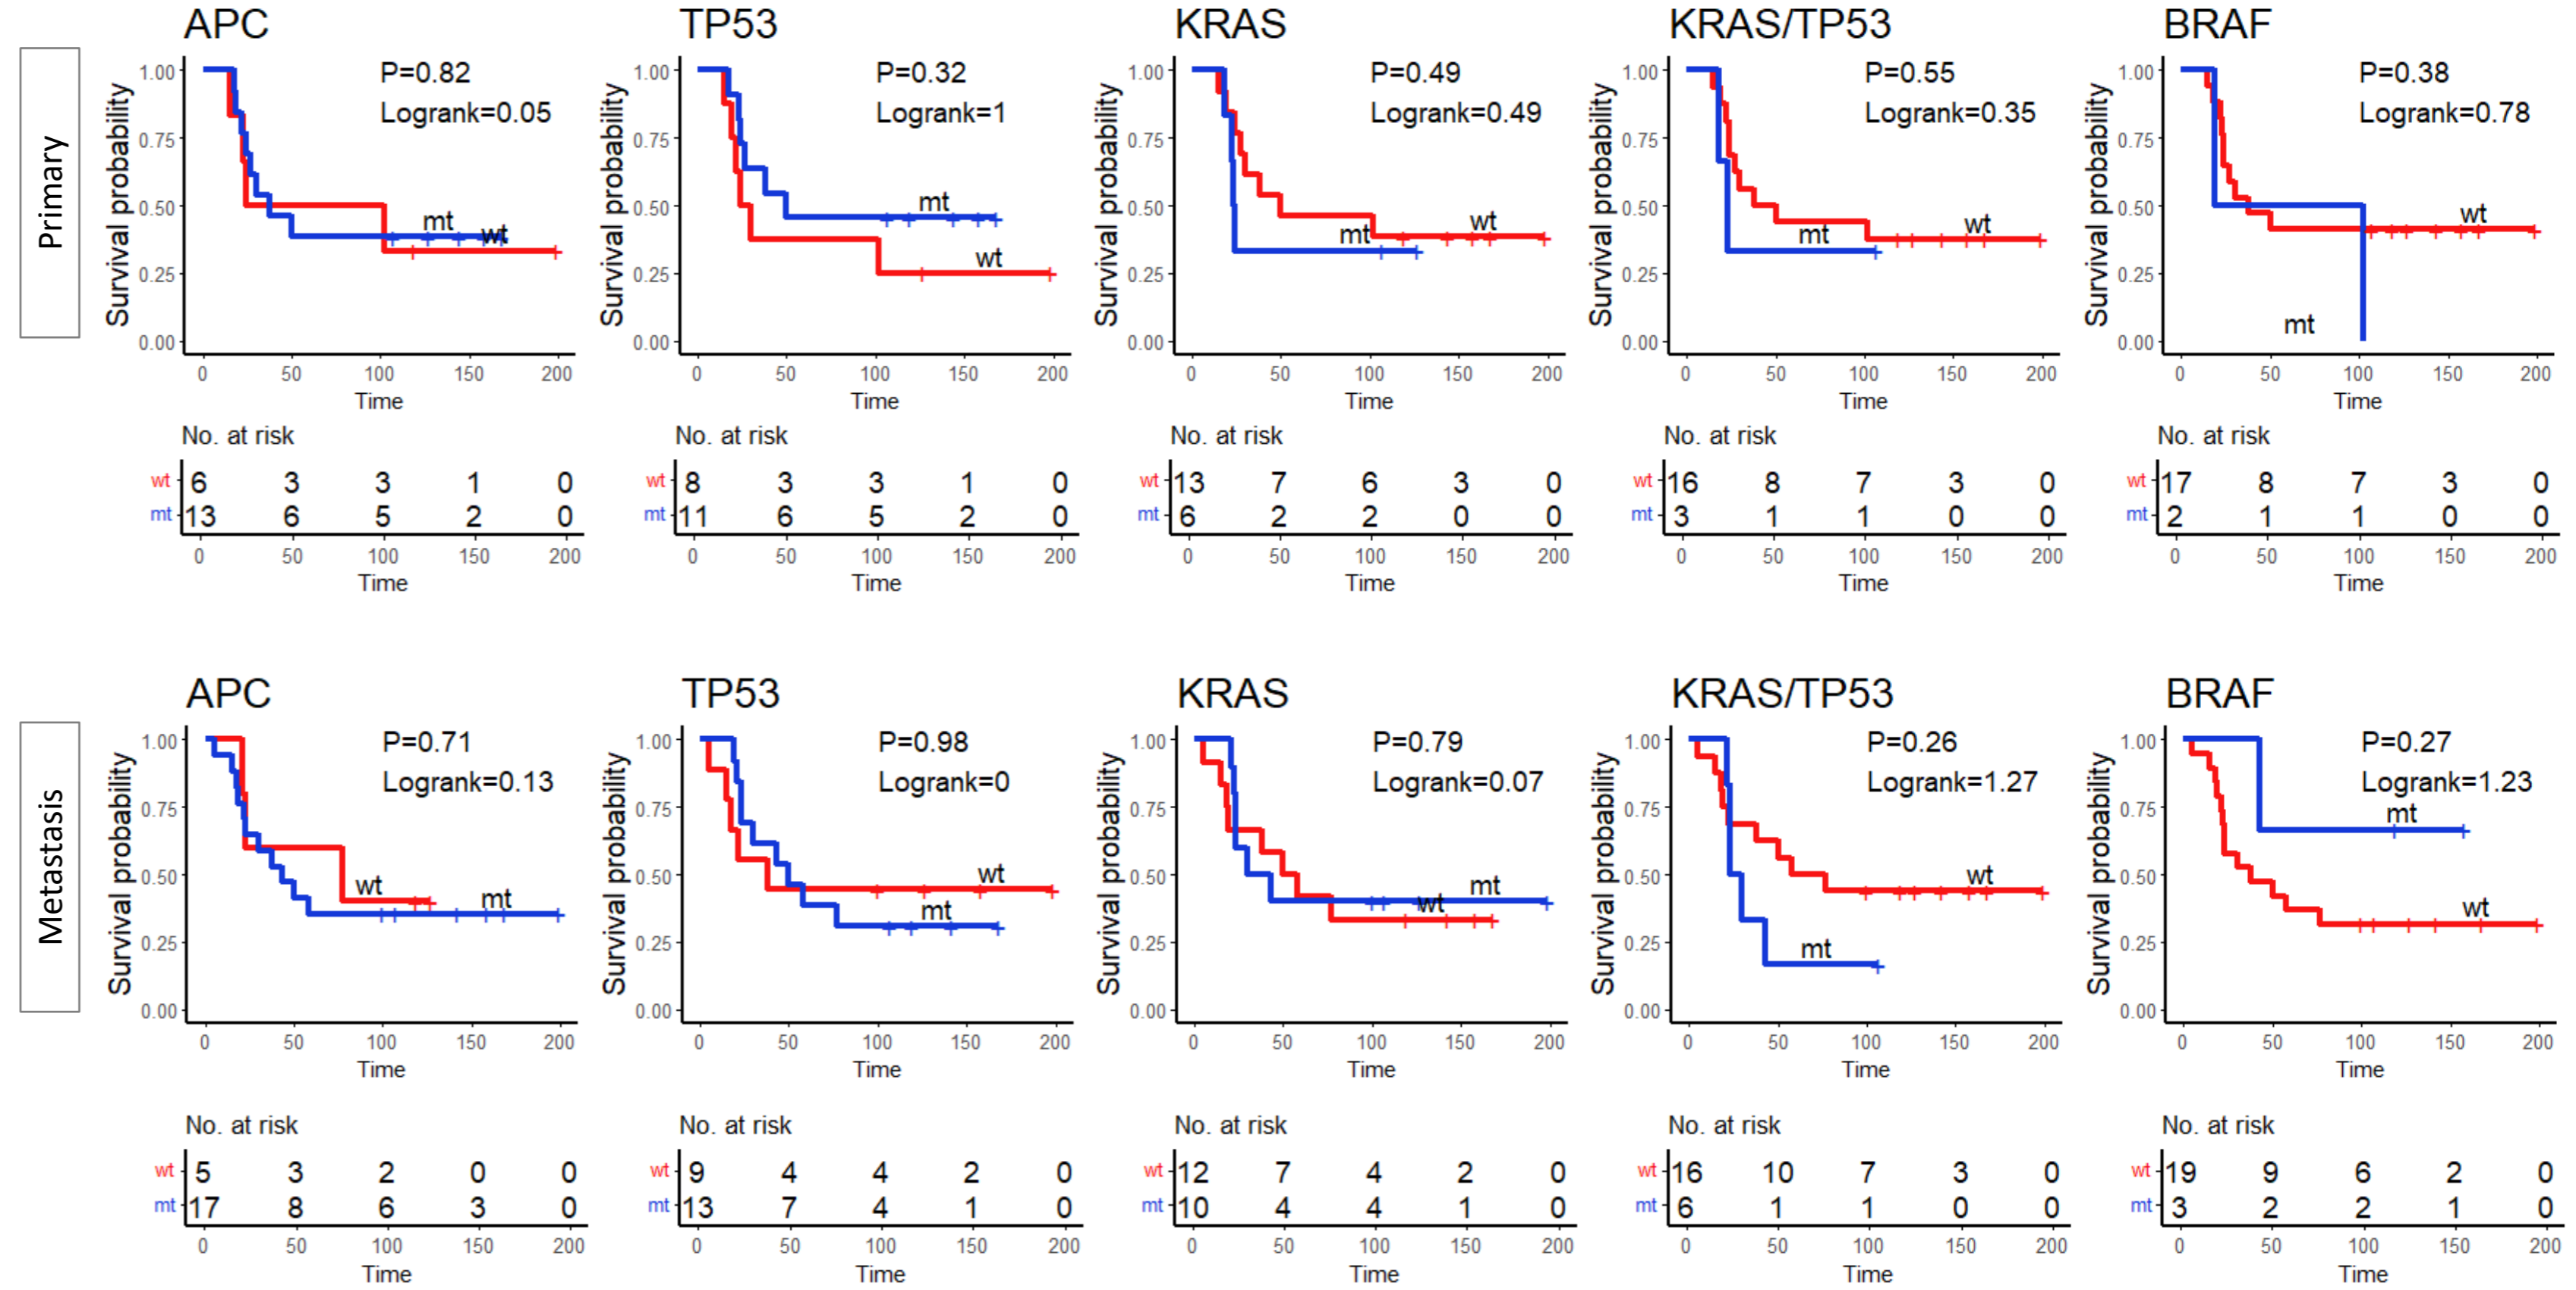

## Supplemental Figure 7

A: Forrest plot demonstrating mutational discordance between primary and secondary (non-matched lesions)

B: Kaplan Meier survival plots for cancer specific survival by mutational groups with Log-rank test and P-value displayed.

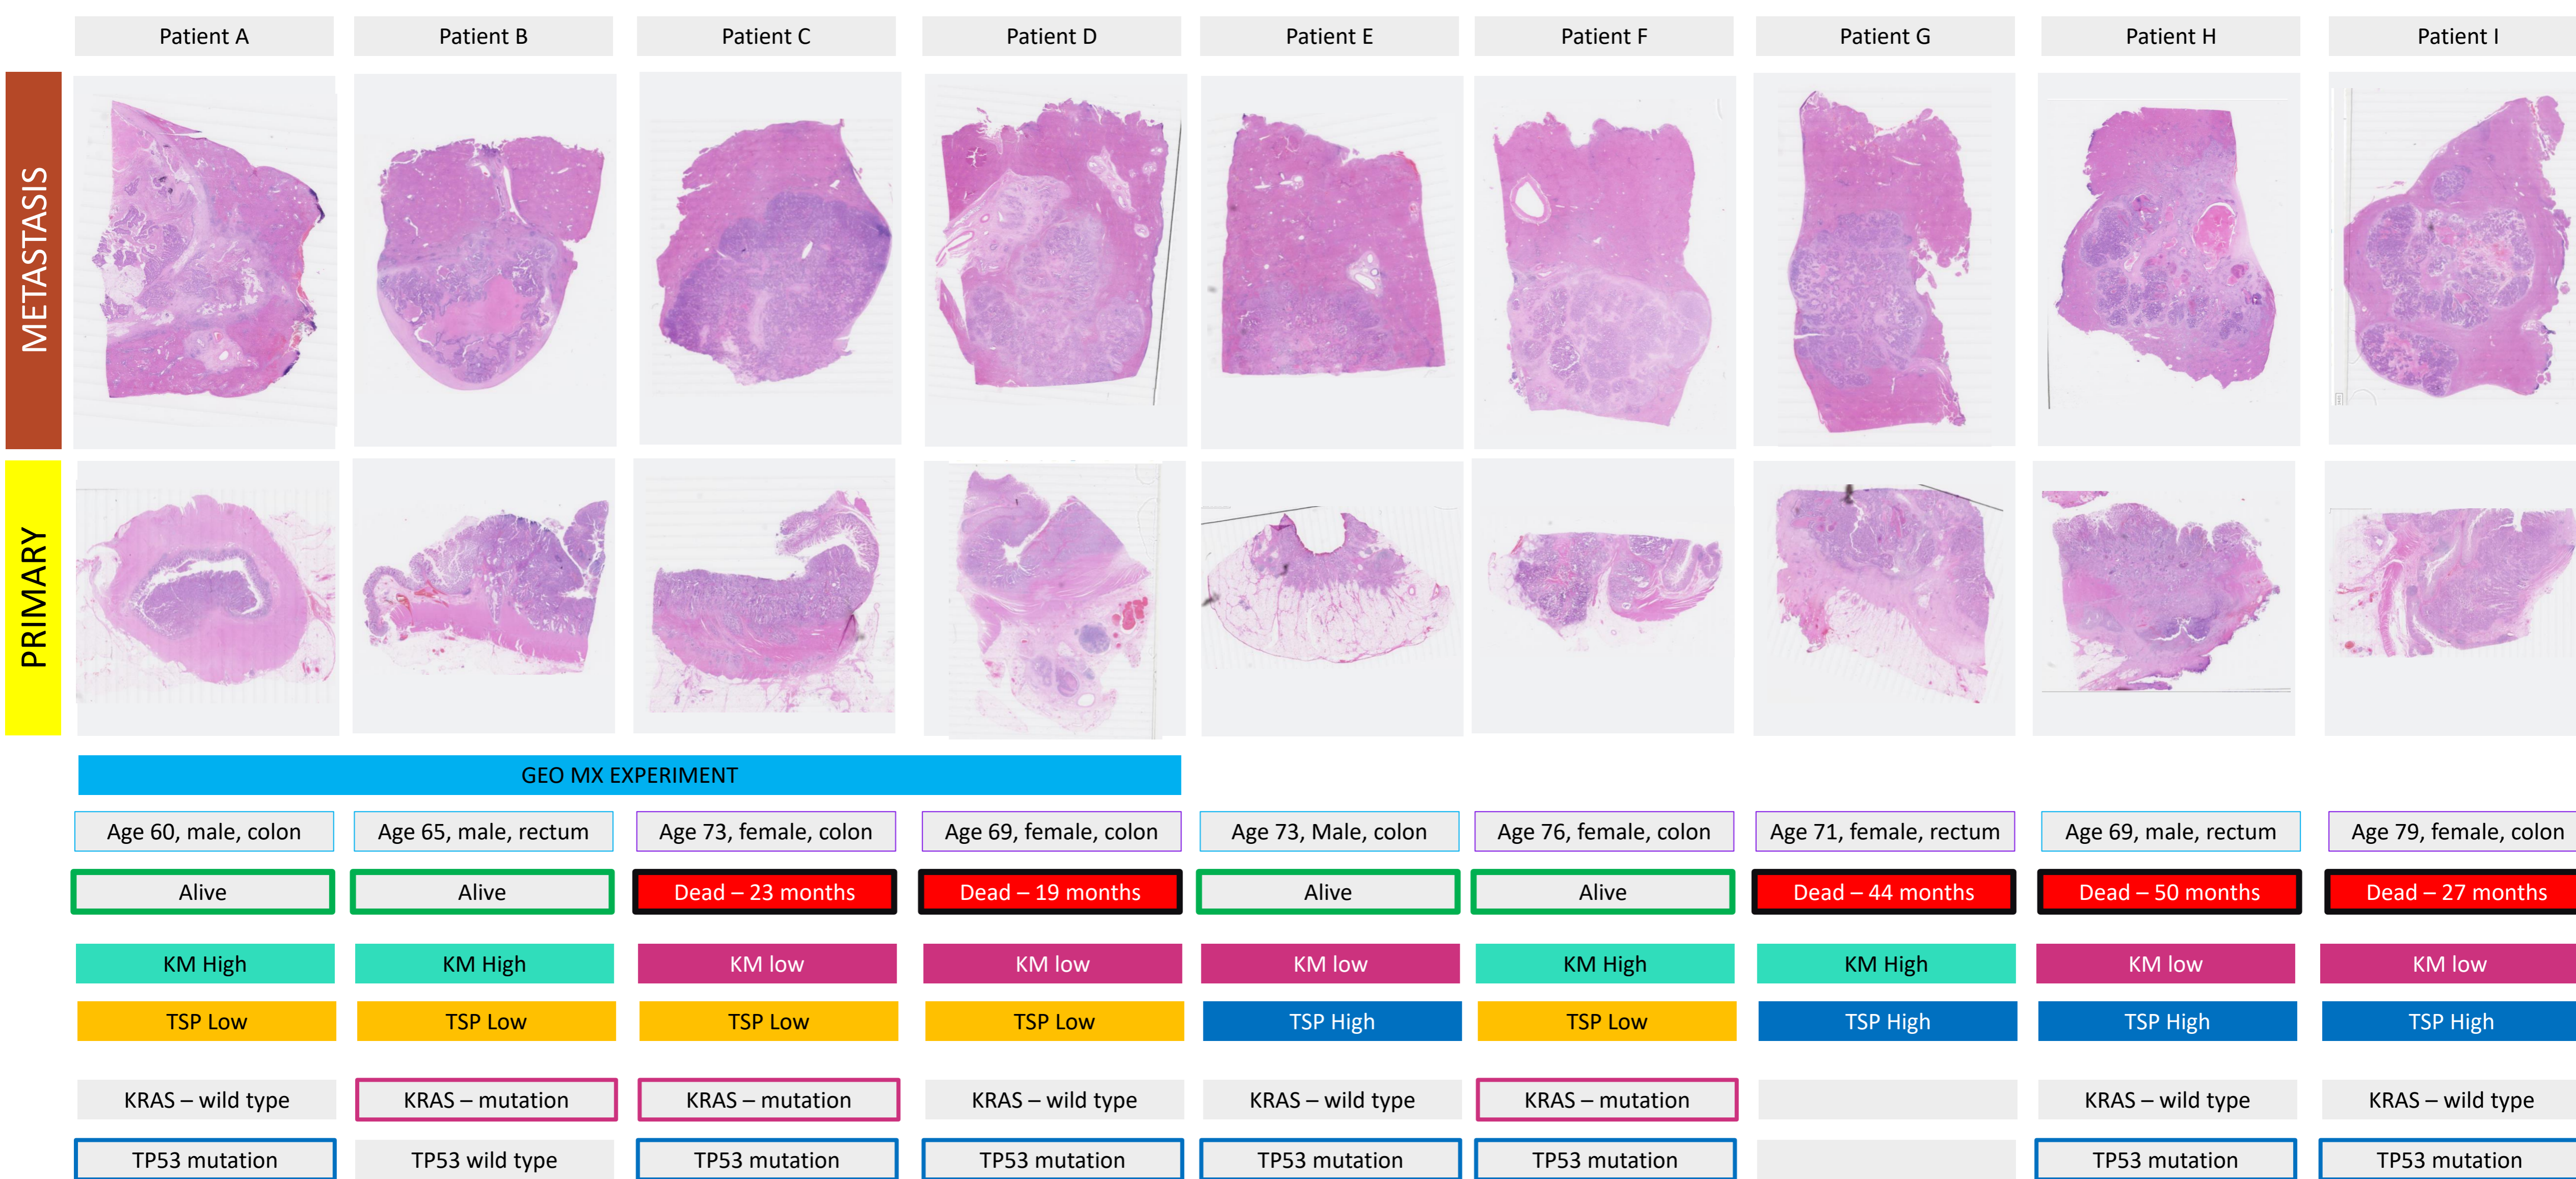

**Supplemental Figure 8: Representative H+E and clinicopathological, mutational and survival details of patients (n=9) undergoing Bulk transcriptomic analysis on the nCounter platform**

9 patients from the cohort (patients A-D in Supplemental Figures 2-4) had bulk transcriptomic analysis on the ncounter platform using the Pancancer IO360 (770 genes) panel with clinicopathological, morphological and mutational characteristics as demonstrated. Representative H+E from the primary and metastatic lesions from the patients are demonstrated. 4 of the patients were selected for analysis on the GeoMx Digital Spatial Profiler. A selection of KM and TSP score were selected for comparison.



**A**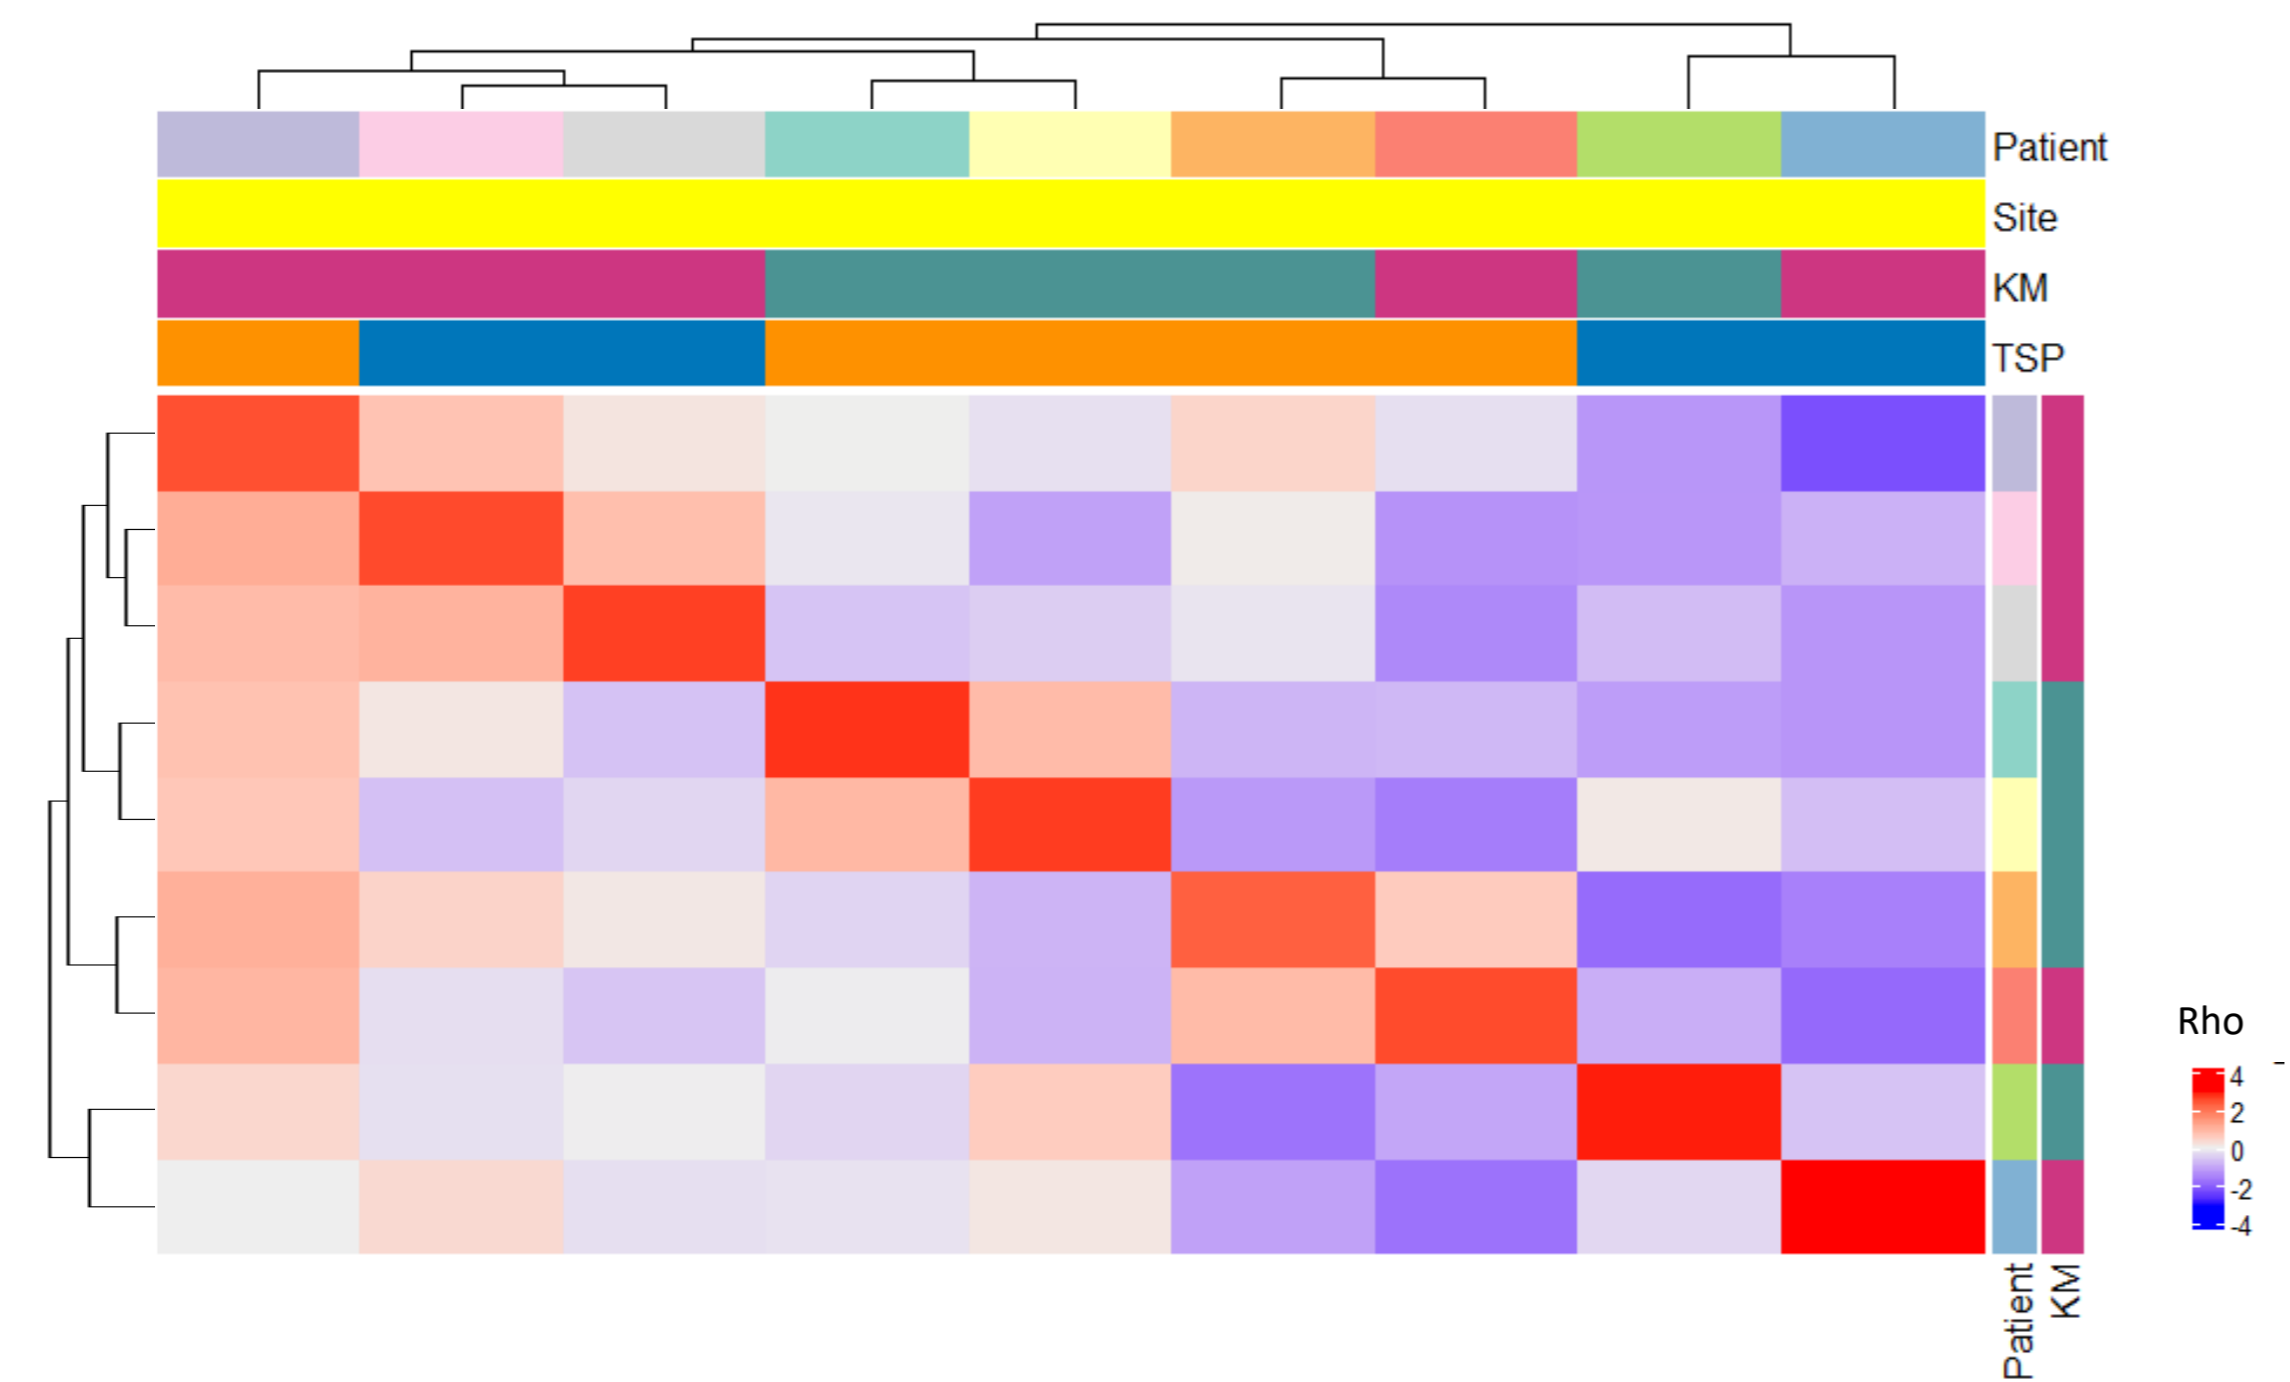**B**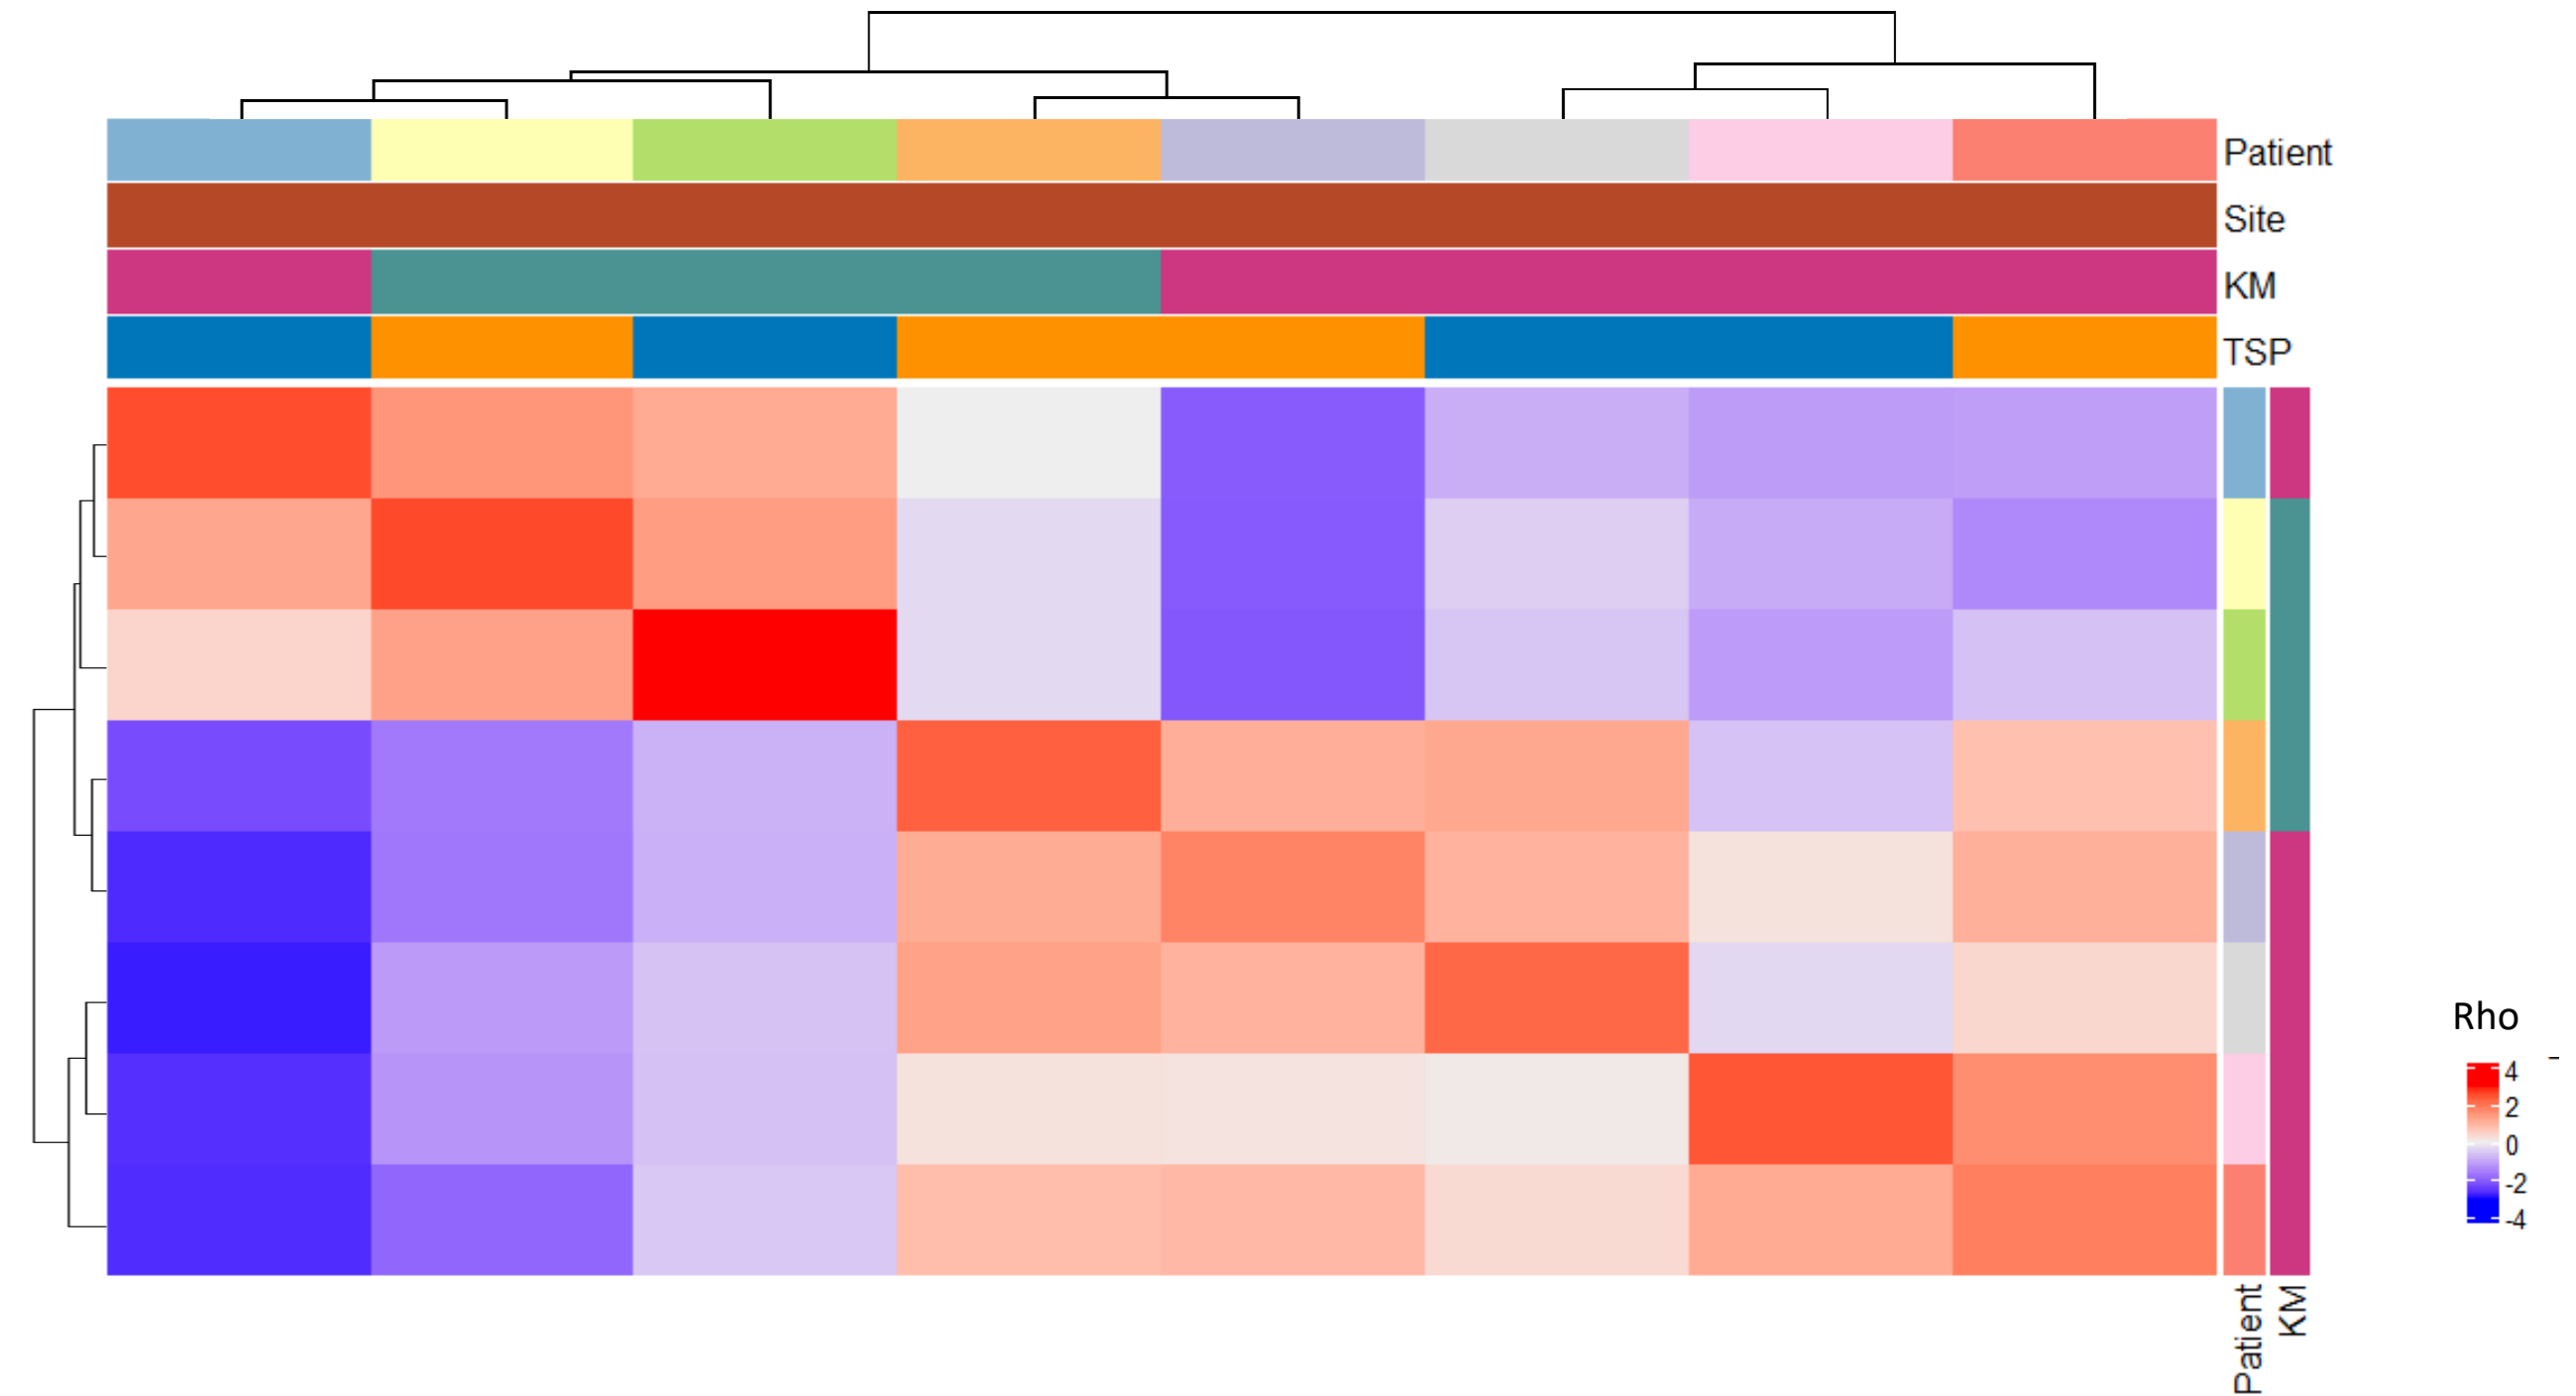

## Supplemental Figure 9

A: Unsupervised analysis using gene expression correlation matrix for Primary lesions only. Patient, site, KM grade, tumor stromal percentage (TSP) are depicted by key. Spearman correlation of all expressed genes performed between each sample sequenced and plotted on the heatmap. k-means clustering of heatmap to demonstrate correlated samples. Red represents strong correlation. Blue represents negative correlation

B: Unsupervised analysis using gene expression correlation matrix for Metastatic lesions. Patient, site, KM grade, tumor stromal percentage (TSP) are depicted by key. Spearman correlation of all expressed genes performed between each sample sequenced and plotted on the heatmap. k-means clustering of heatmap to demonstrate correlated samples. Red represents strong correlation. Blue represents negative correlation

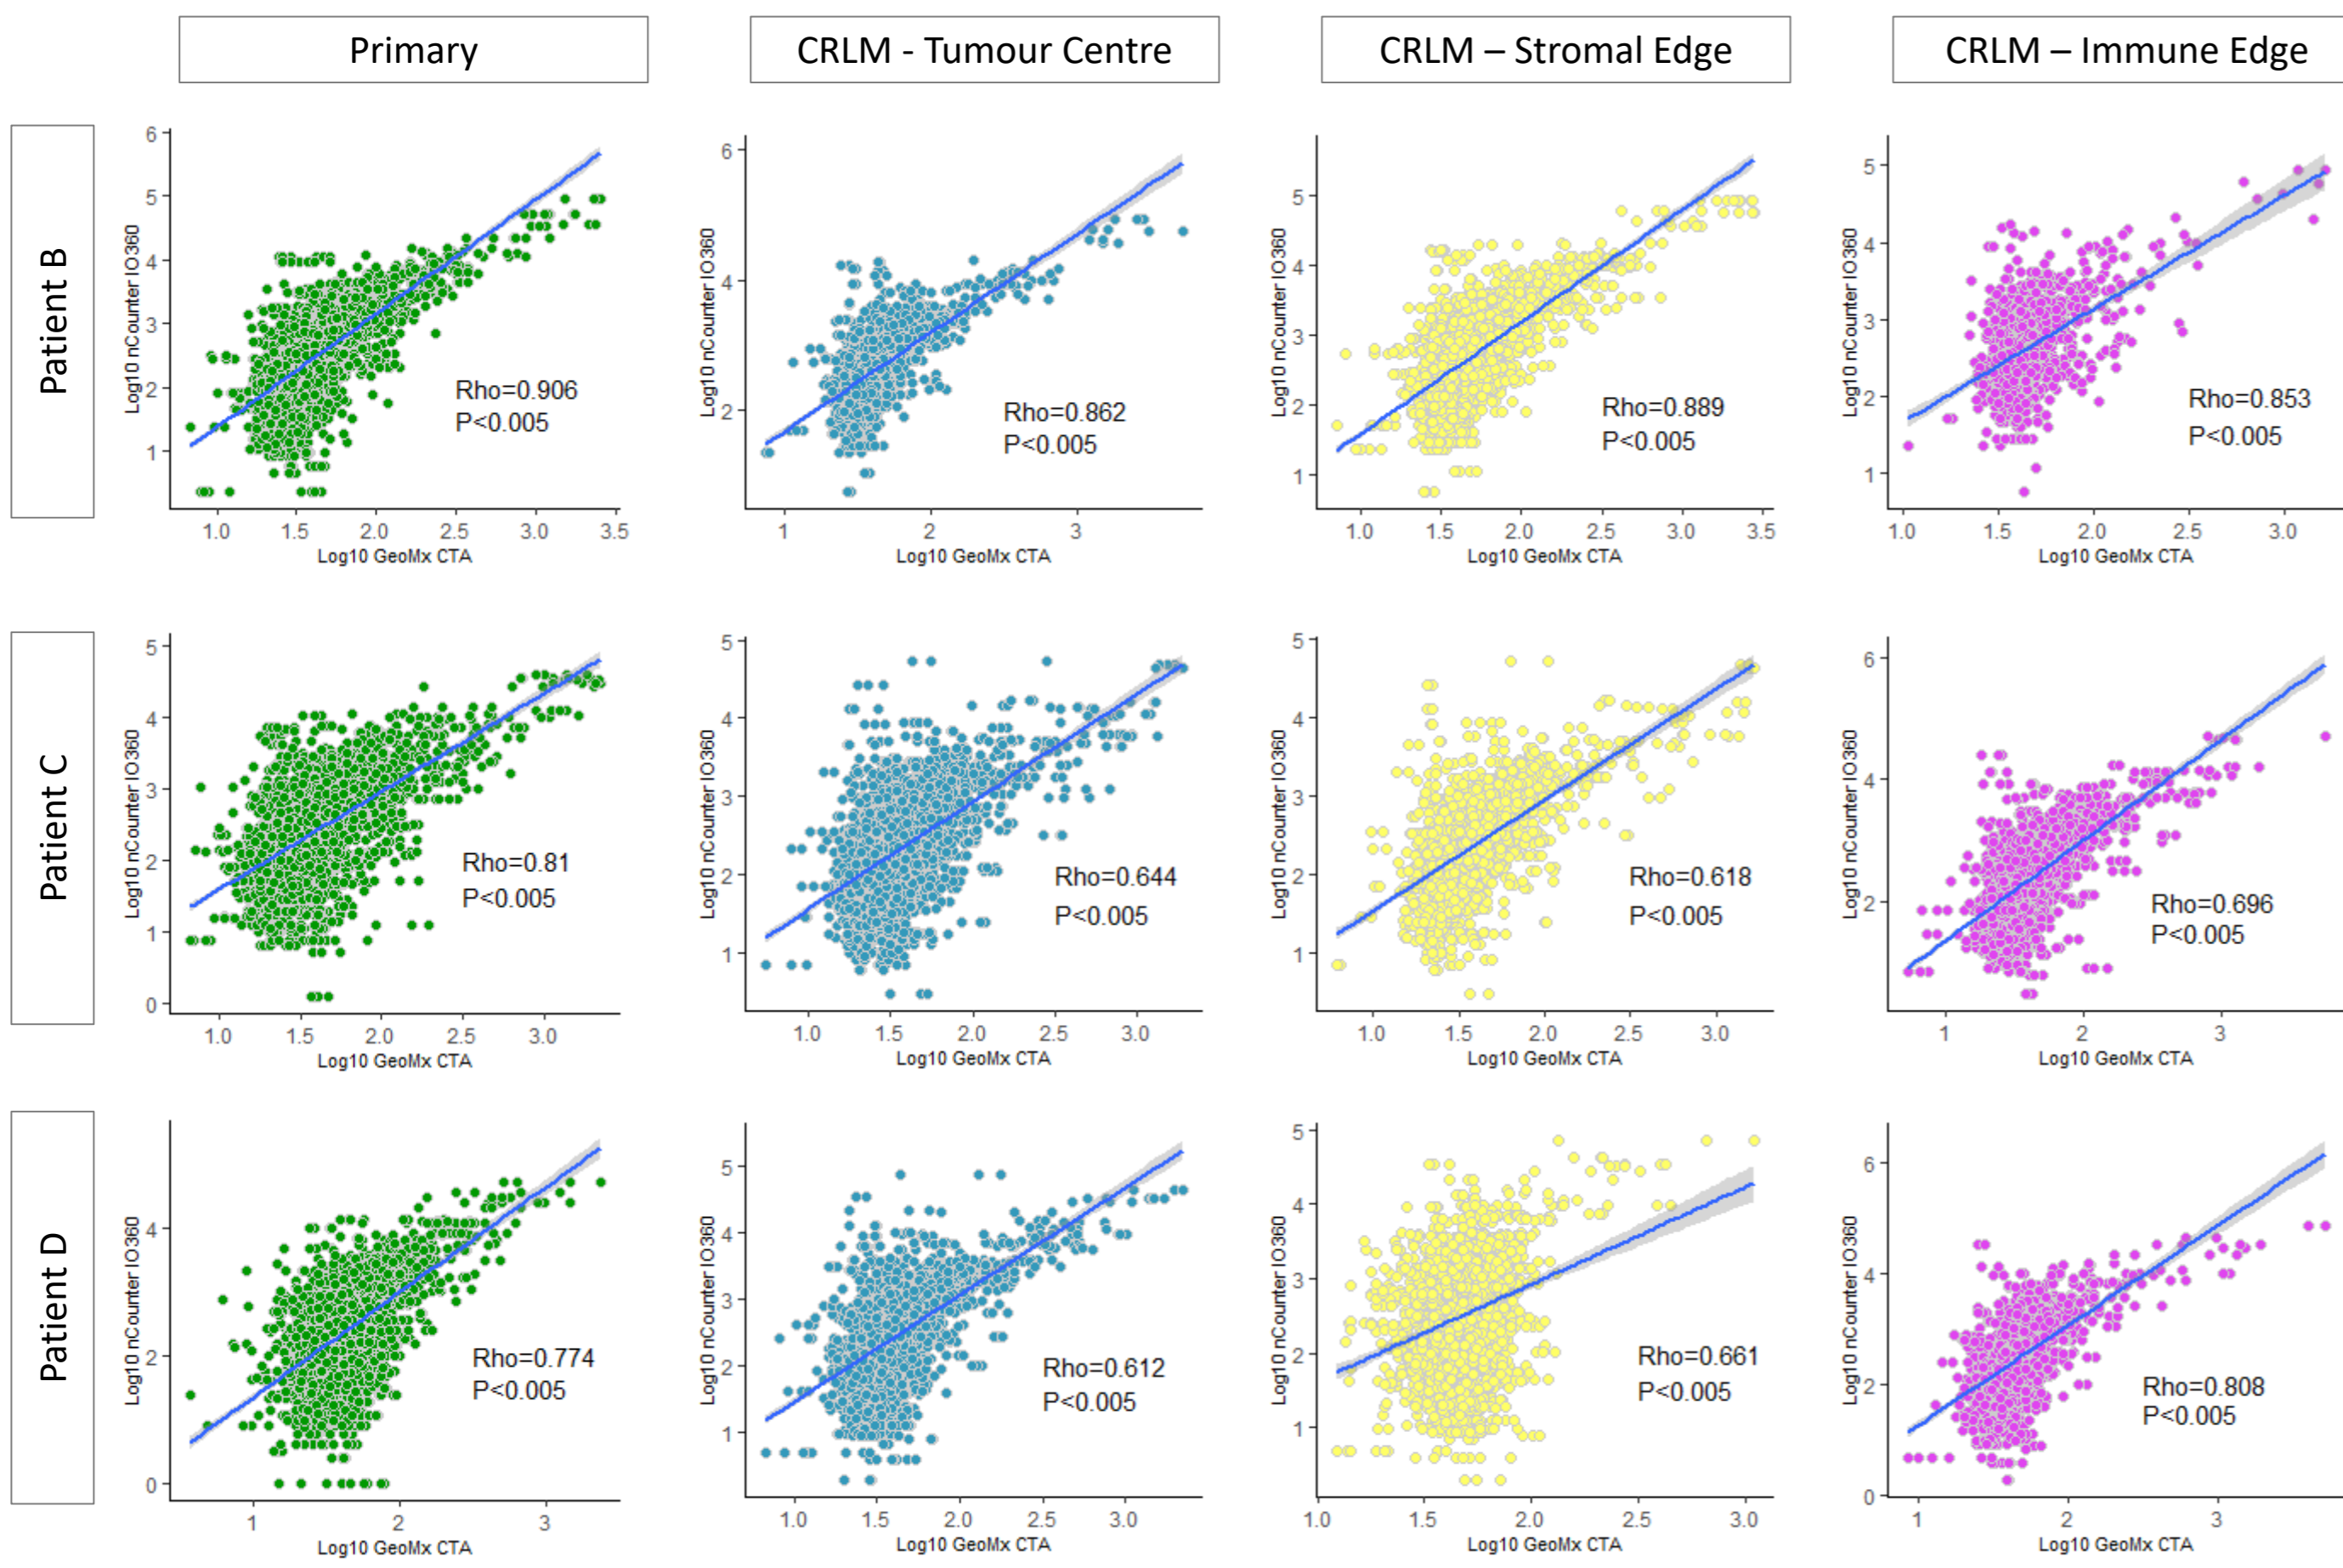

## Supplemental Figure 10

### Comparison of nCounter IO360 and GeoMx CTA Gene Expression in Matched Samples

Each dot represents log10 expression of gene on nCounter IO360 (y-axis) and GeoMx (x-axis) organised by region and patient.

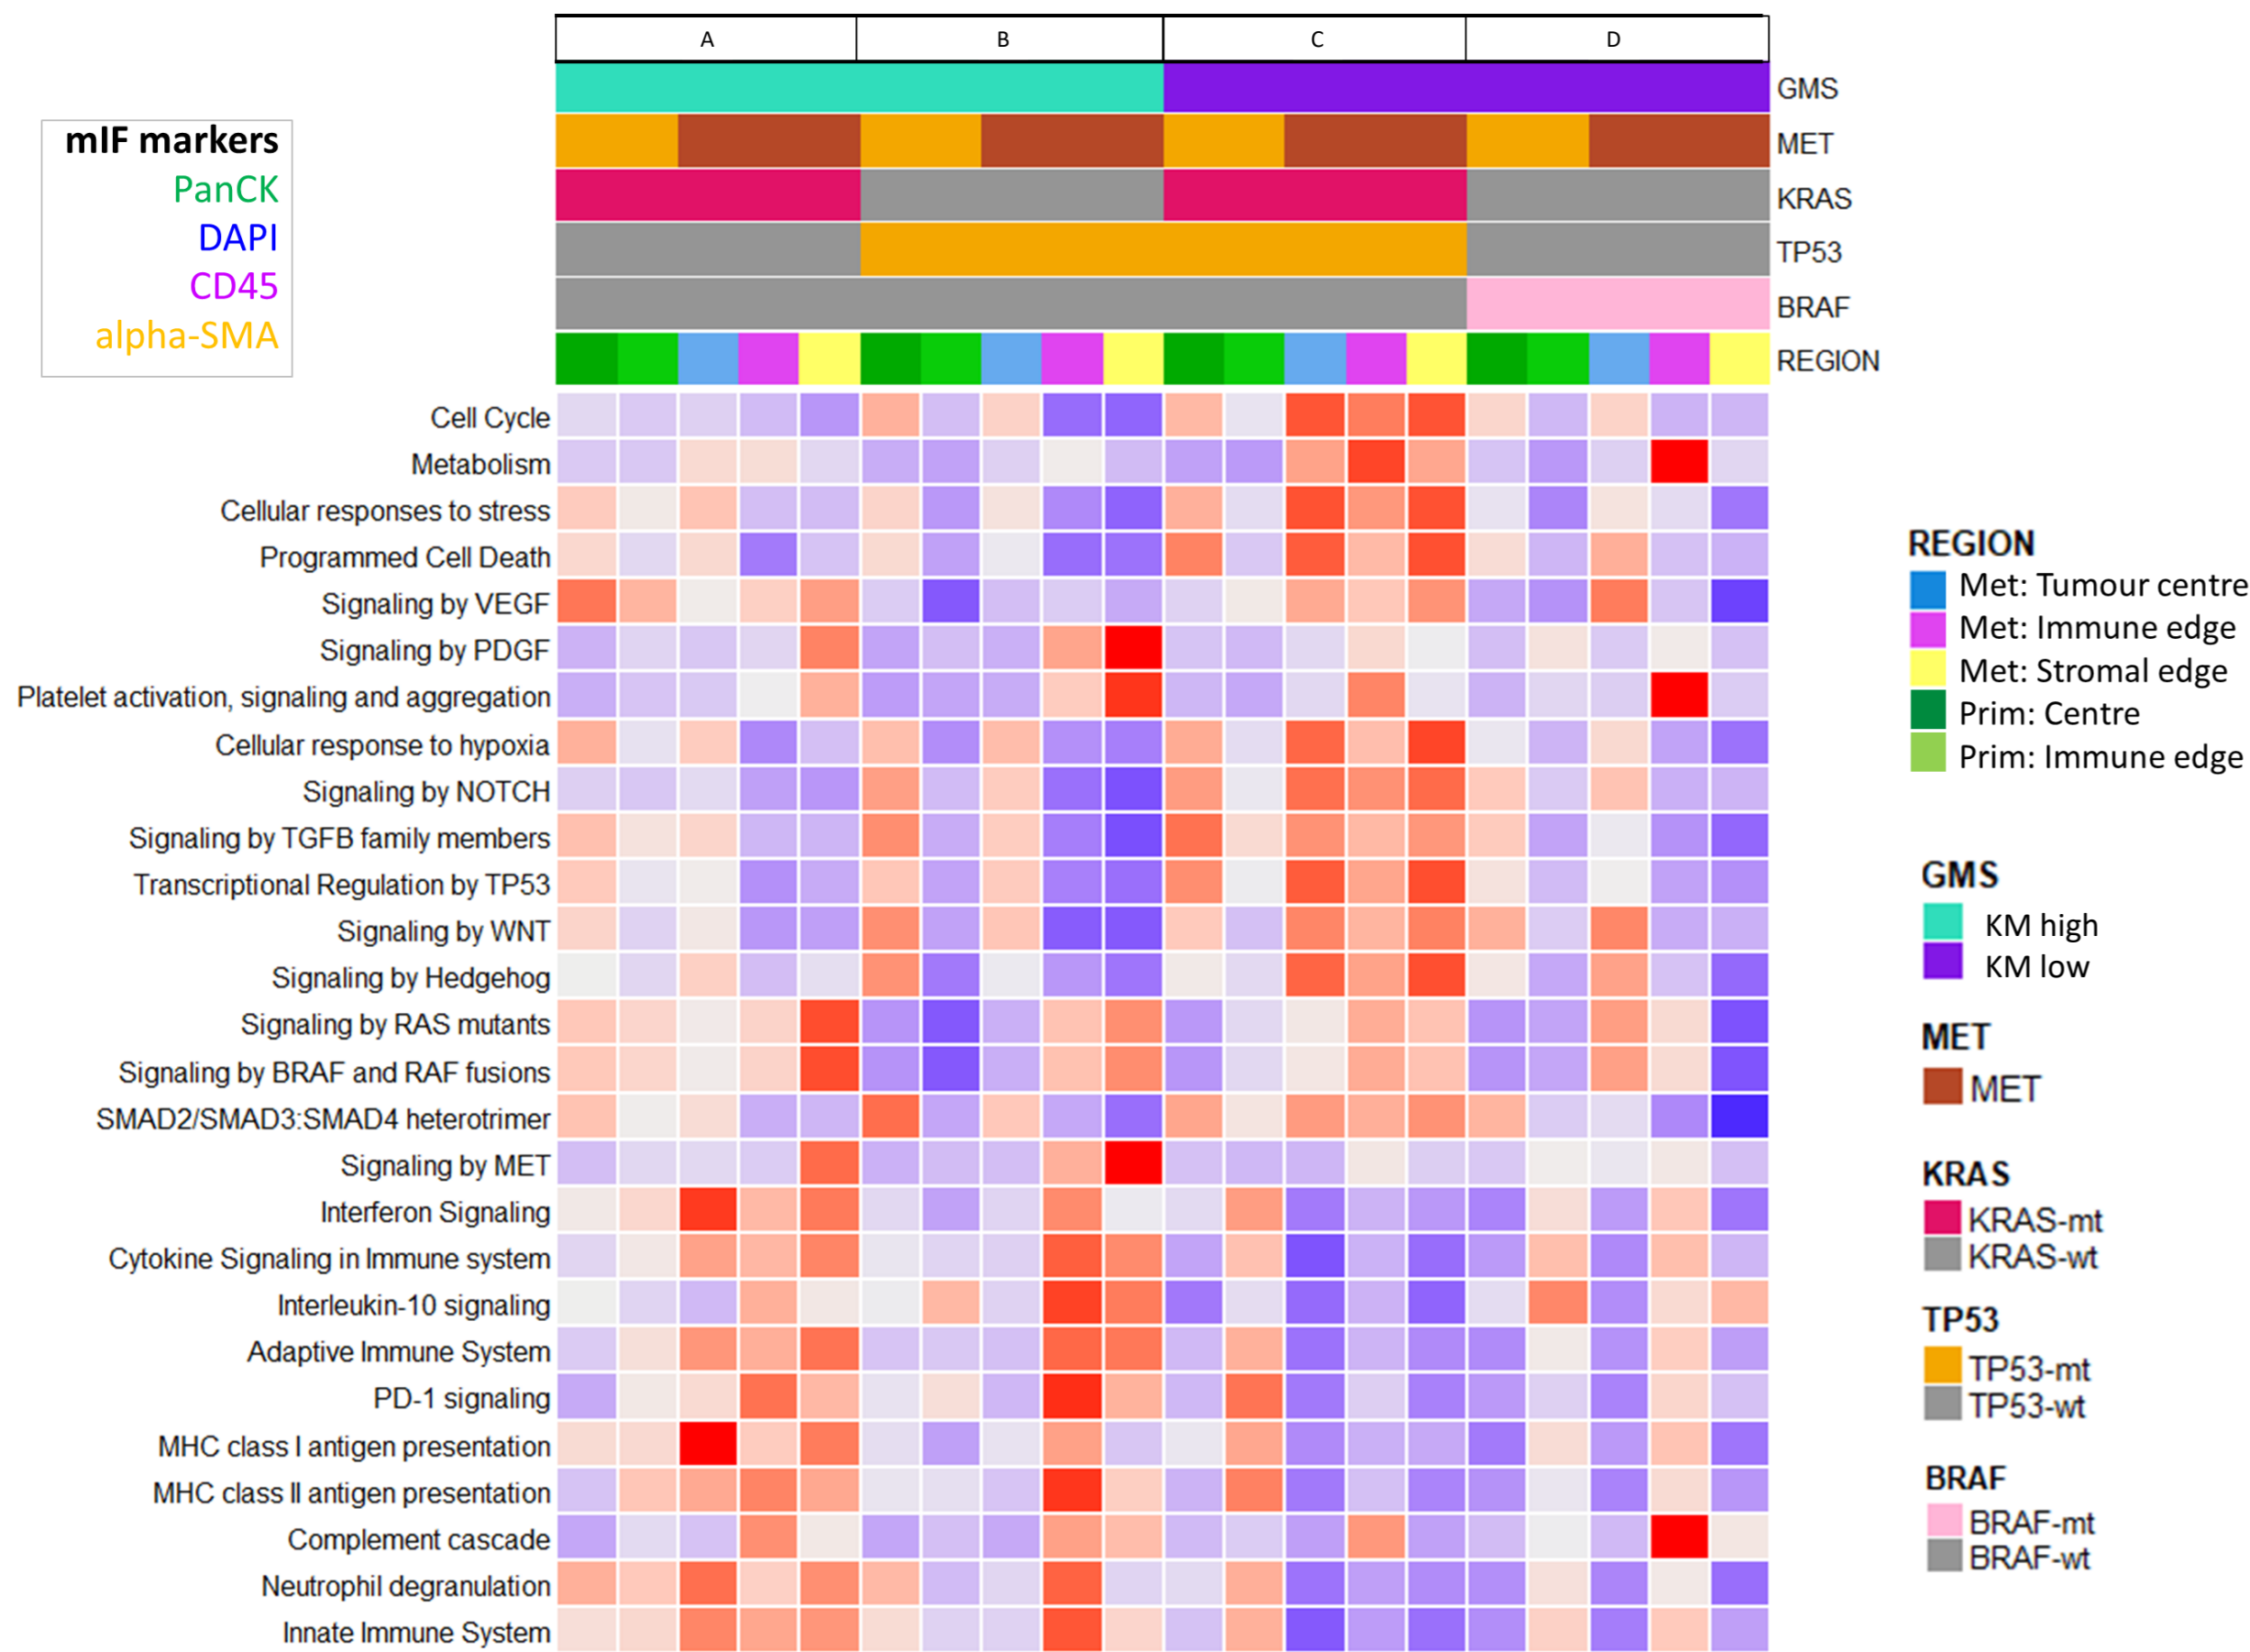

## Supplemental Figure 11

### Spatially Resolved Transcriptomic Analysis using REACTOME curated gene sets

Unclustered heatmap demonstrating summarised mean gene expression for each selected REACTOME pathway with annotations as shown. Ordered by patient, lesion (primary, metastasis) and annotated topographical region.

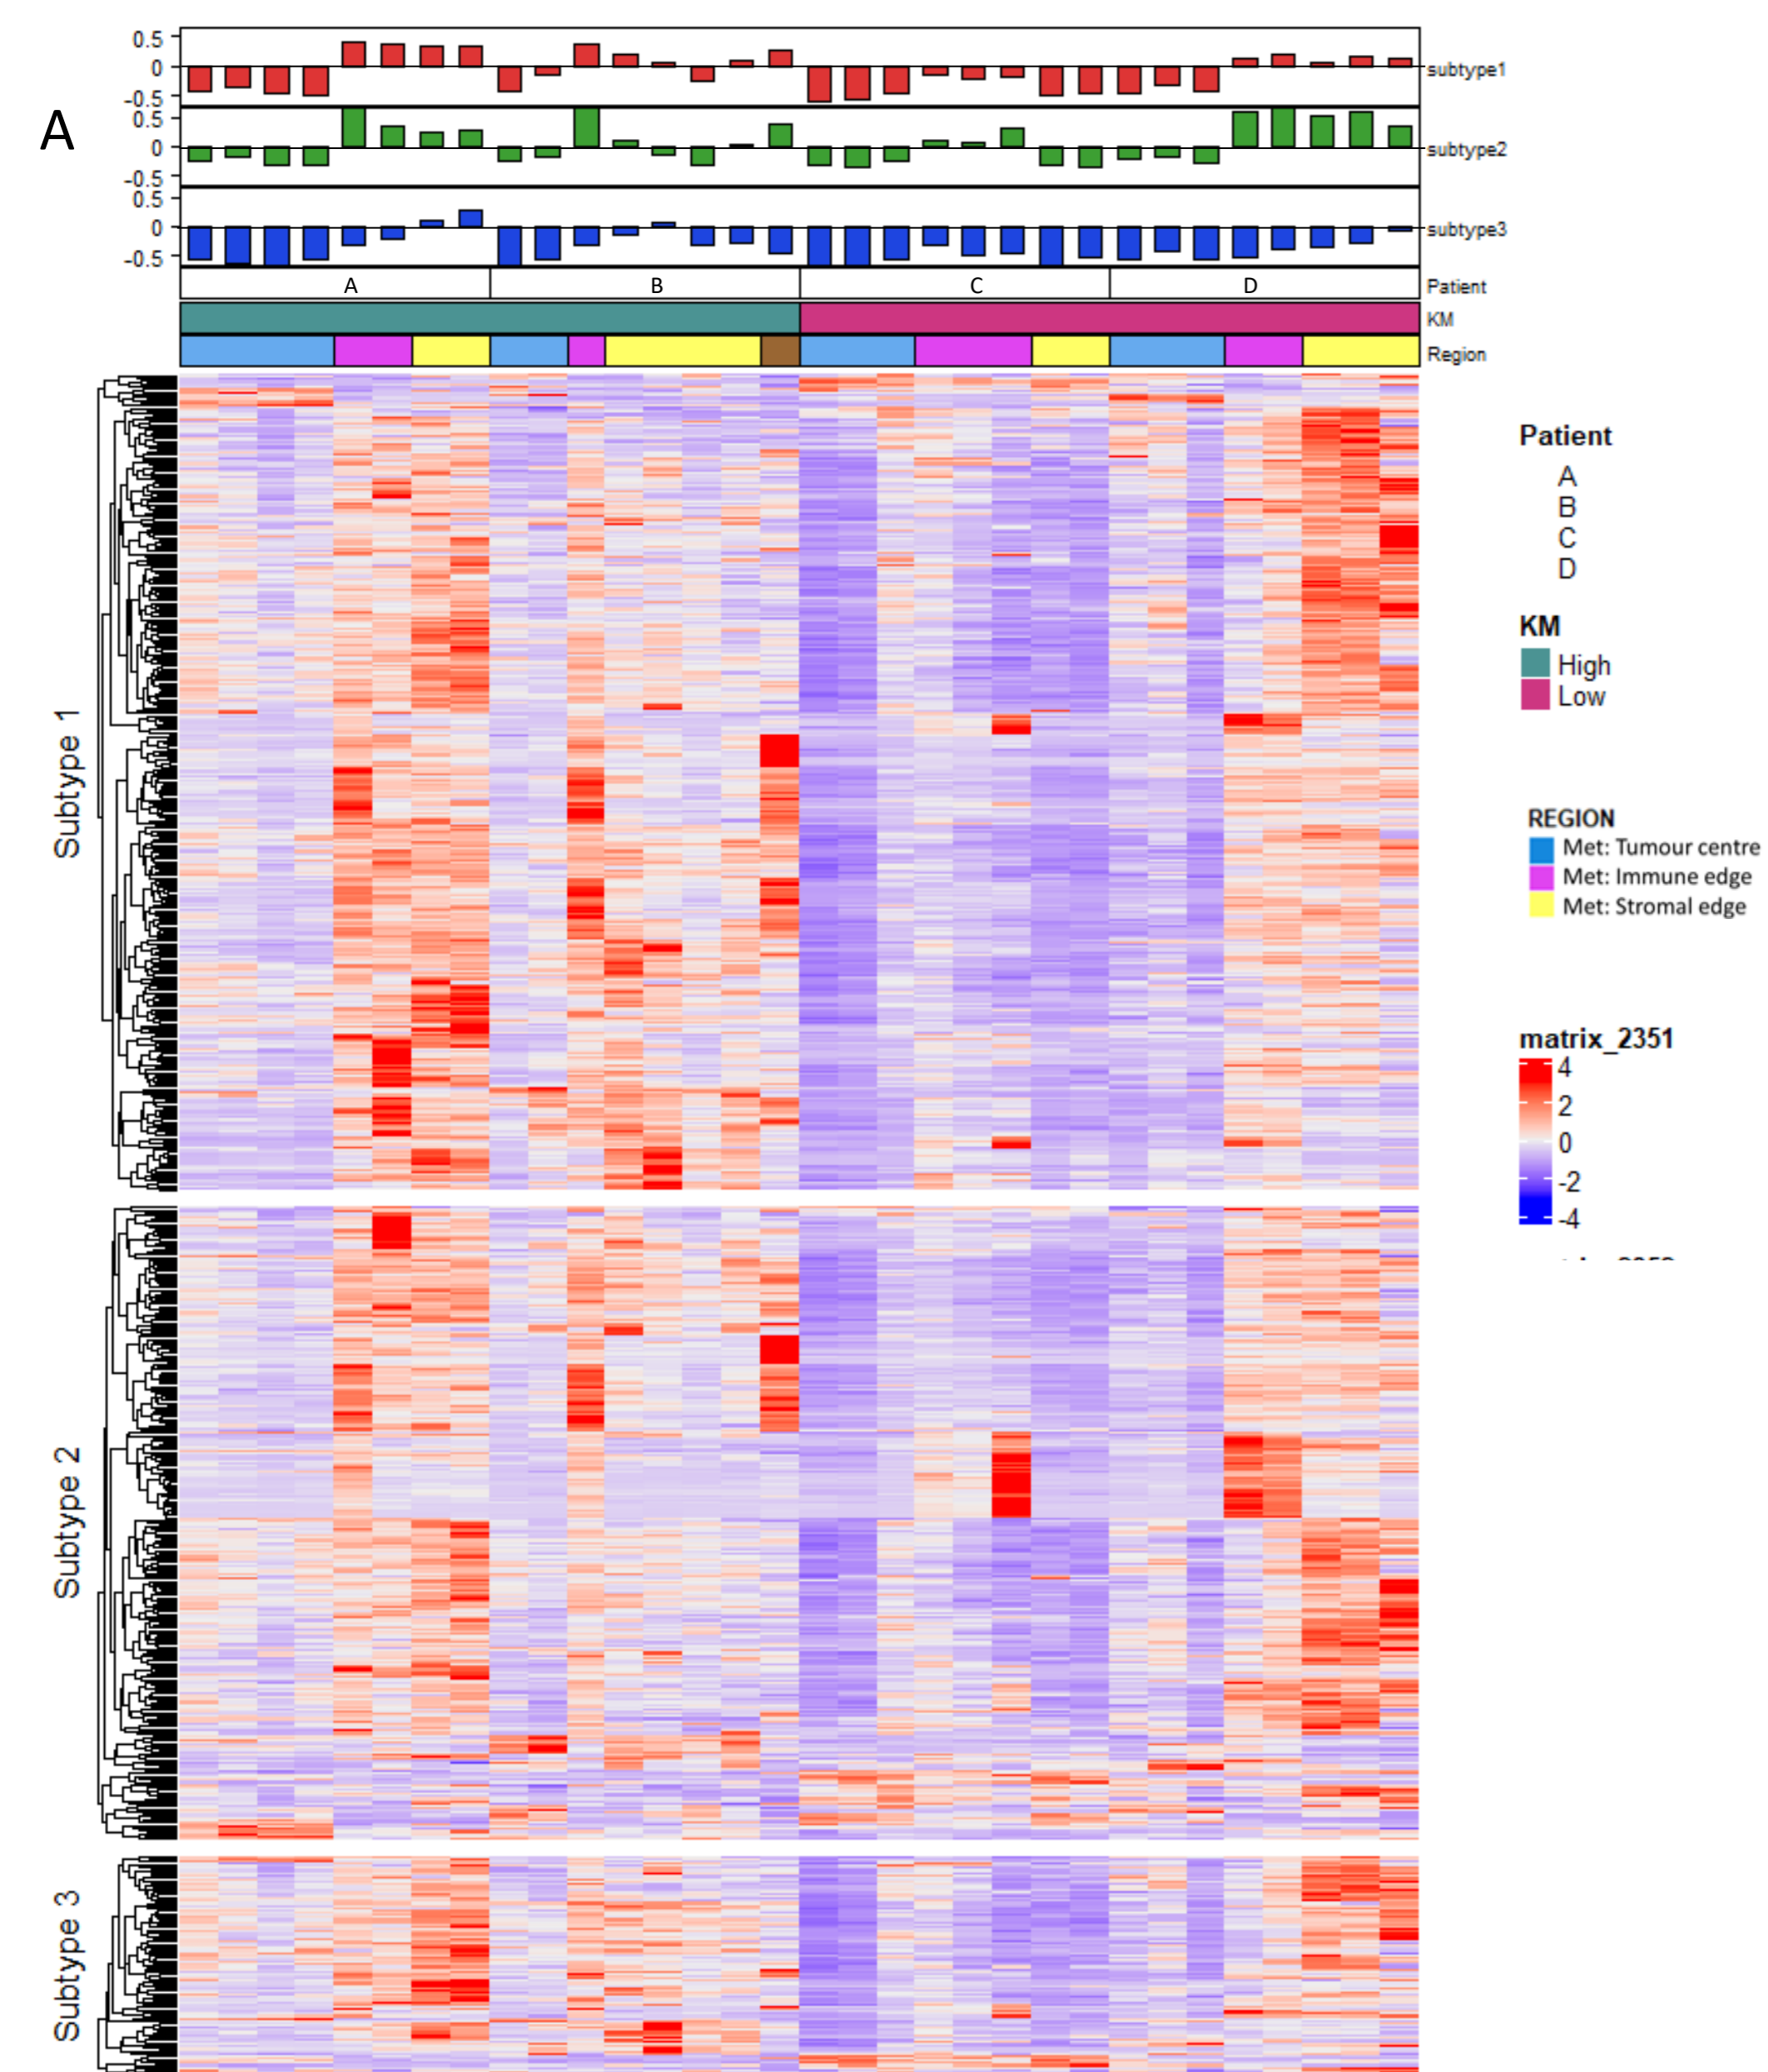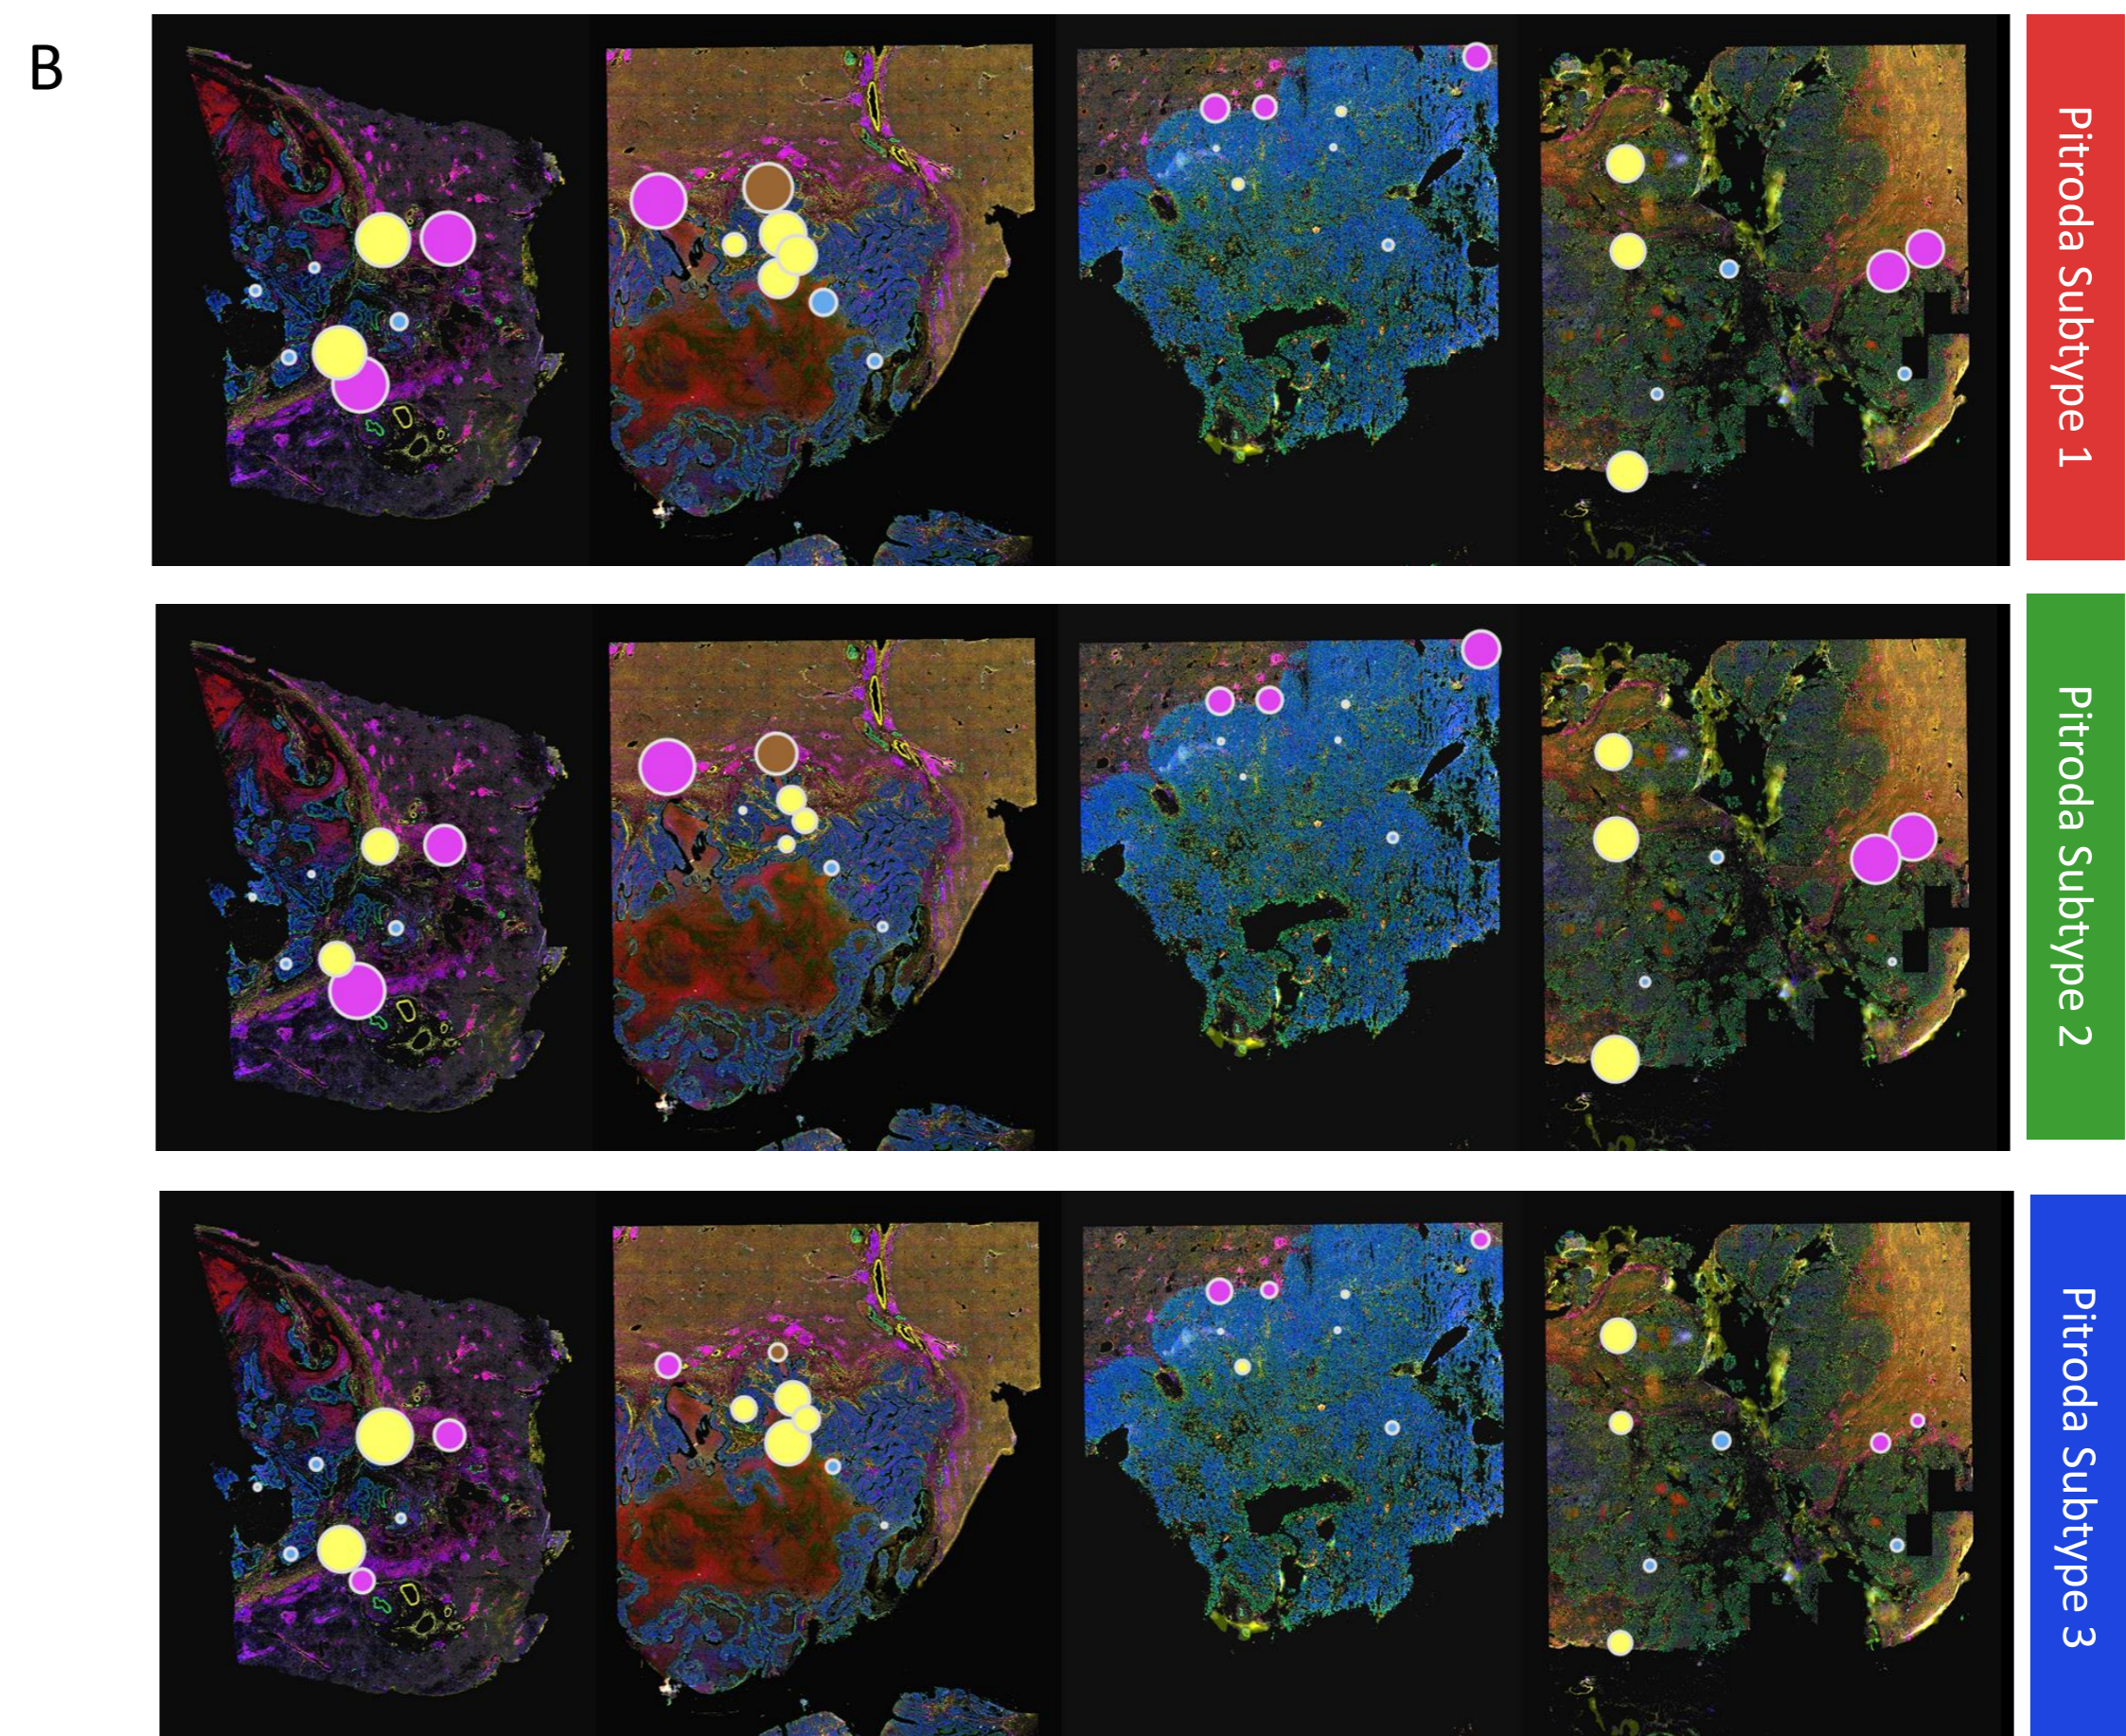

## Supplementary Figure 12

A: Pitroda et al gene sets applied across spatial transcriptomic data set. ssGSEA enrichment score at top of heat map. Heat map comparing expression across CRLM and region. Overlap between CTA and Pitroda geneset, Subtype 1: (348 of 1506 genes) Subtype 2: (270 of 1259 genes) Subtype 3: (94 of 603 genes)

B: Geneset Enrichment score for each Pitroda subtype demonstrated by radius of region and topographic location on tumour. Annotated region demonstrated by color

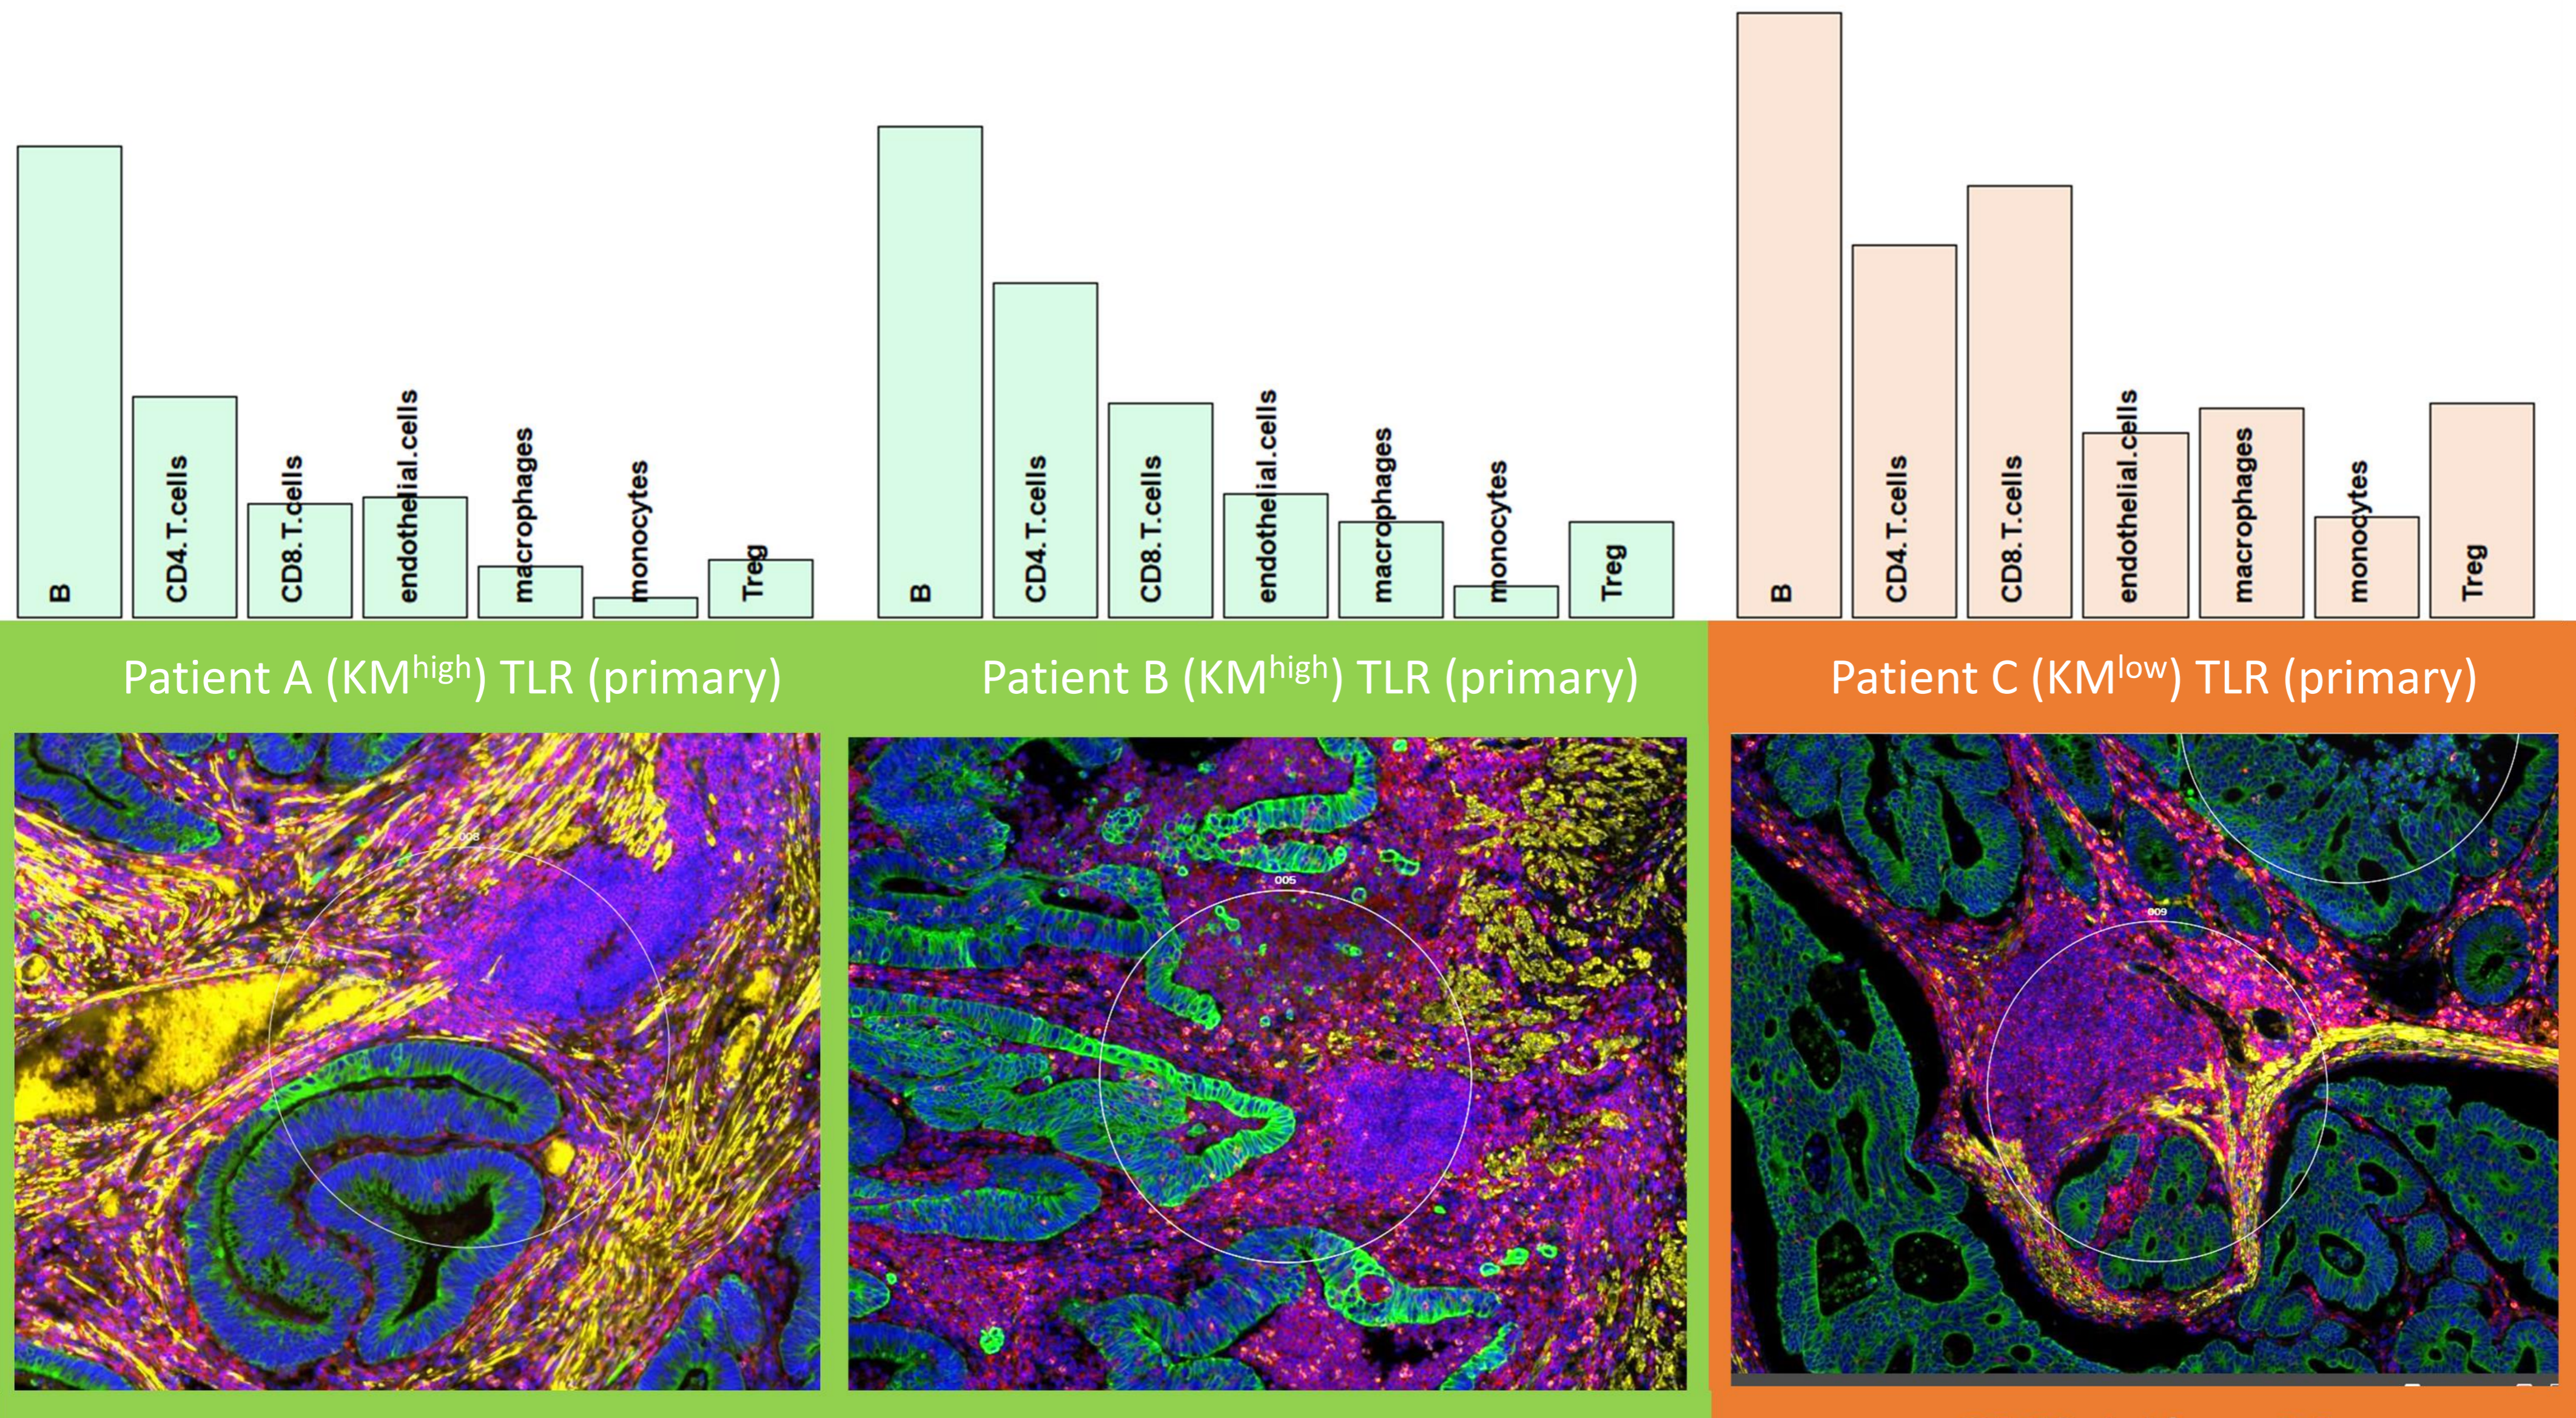

**Supplementary Figure 13: Immune Cell Spatial Deconvolution of Tertiary Lymphoid Regions**

*The immune cell populations are plotted for Tertiary Lymphoid Regions in Lesions A,B (KM-high) (Patient A, image 5, Supplemental Figure 3 and Patient B, image 1, Supplemental Figure 4) and Lesion C (KM-low) (Patient C, image 9, Supplemental Figure 5).*
